# Supplementary material
Source: publisher figshare collection journal article supplement (https://future-science-group.figshare.com/ndownloader/files/34994842)
Supplement: Supplementary file 1 [file 34994842]

## Sheet: (Supplementary_table_8)_Signifi
NGS_ID	location	KMT2D_1	KMT2D_2	KMT2D_3	KMT2D_4	KMT2D_6	KMT2D_7	KMT2D_8	KMT2D_9	KMT2D_10	control1	control2	control3	control4	control5	control6	control7	control8	control9	control10	control11	control12	control13	control14	control15	control16	control17	control18	control19	control20	control21	control22	control23	control24	control25	control26	control27	control28	control29	KMT2B_1	KMT2B_2	KMT2B_3	KMT2B_4	KMT2B_5	KMT2B_6	KMT2B_7	KMT2B_8	KMT2B_9	KMT2B_10
NGS_ID	location	KS1	KS1	KS1	KS1	KS1	KS1	KS1	KS1	KS1	control	control	control	control	control	control	control	control	control	control	control	control	control	control	control	control	control	control	control	control	control	control	control	control	control	control	control	control	control	DYT-KMT2B	DYT-KMT2B	DYT-KMT2B	DYT-KMT2B	DYT-KMT2B	DYT-KMT2B	DYT-KMT2B	DYT-KMT2B	DYT-KMT2B	DYT-KMT2B
109375	Island	0.301887	0.914286	0.877193	0.237288	0.5	0.333333	0.130435	0.4	0.148148	0.464789	0.230769	0.638298	0.156863	0.264368	0.176471	0.347222	0.25641	0.151515	0.349206	0.264151	0.115385	0.210526	0.169231	0.0666667	0.0508475	0.0833333	0.181818	0.153846	0.15625	0.0491803	0.226667	0.0666667	0.264706	0.103448	0.121951	0.00819672	0.111111	0.214286	0.0606061	0.225806	0.535714	0.285714	0.21875	0.2	0.193548	0.2375	0.148148	0.444444
109377	Island	0.285714	0.902778	0.965517	0.283333	0.526316	0.333333	0.144928	0.422222	0.240741	0.486111	0.309091	0.659574	0.173077	0.252747	0.144928	0.376623	0.234568	0.183099	0.34375	0.290909	0.12	0.28	0.166667	0.0434783	0.0169492	0.117647	0.184211	0.175926	0.151515	0.0645161	0.263158	0.0935252	0.297297	0.122222	0.275	0.0409836	0.12069	0.225806	0.114286	0.253968	0.535714	0.285714	0.215385	0.189655	0.151515	0.246914	0.142857	0.444444
109379	Island	0.288136	0.971831	0.901639	0.25	0.5	0.297297	0.147059	0.422222	0.160714	0.459459	0.285714	0.680851	0.153846	0.239583	0.114286	0.358974	0.2375	0.191781	0.338462	0.218182	0.12	0.266667	0.161765	0.0833333	0.0645161	0.12	0.179487	0.155963	0.130435	0.0322581	0.240506	0.0851064	0.253333	0.111111	0.190476	0.0390625	0.135593	0.21875	0.0571429	0.25	0.642857	0.277778	0.208955	0.16129	0.151515	0.22619	0.137931	0.444444
109381	Island	0.292308	0.962963	0.863636	0.222222	0.483871	0.315789	0.140845	0.489362	0.157895	0.4375	0.322034	0.66	0.163636	0.245098	0.130435	0.345679	0.222222	0.216216	0.328125	0.196429	0.102041	0.270588	0.164179	0.0612245	0.0634921	0.0980392	0.153846	0.158333	0.138889	0.0461538	0.228916	0.0604027	0.231707	0.106383	0.195652	0.046875	0.135593	0.235294	0.0833333	0.258065	0.655172	0.277778	0.171875	0.228571	0.138889	0.272727	0.121212	0.45
109383	Island	0.30303	0.942529	0.887097	0.181818	0.5	0.371429	0.117647	0.511628	0.118644	0.366667	0.372881	0.565217	0.109375	0.223301	0.15625	0.348837	0.229885	0.164384	0.298507	0.160714	0.155556	0.269663	0.15942	0.0909091	0.0588235	0.0851064	0.197368	0.173228	0.144737	0.0338983	0.183908	0.0526316	0.228916	0.108696	0.160714	0.047619	0.138462	0.25	0.05	0.184615	0.517241	0.230769	0.164179	0.197368	0.190476	0.2375	0.108108	0.470588
109385	Island	0.3	0.952381	0.83871	0.307692	0.431034	0.369863	0.164179	0.609756	0.114754	0.354167	0.372881	0.653061	0.106061	0.2	0.178571	0.329268	0.213483	0.246575	0.246154	0.196429	0.122449	0.285714	0.111111	0.0769231	0.0540541	0.0930233	0.189189	0.154412	0.1375	0.0555556	0.174419	0.0606061	0.2	0.0823529	0.114754	0.0172414	0.1	0.297872	0.0512821	0.211268	0.555556	0.238095	0.150685	0.255814	0.243902	0.291139	0.0909091	0.411765
109387	Island	0.269841	0.671053	0.625	0.296296	0.301887	0.323529	0.181818	0.6	0.0952381	0.275862	0.42	0.686275	0.0958904	0.235294	0.147059	0.253731	0.170732	0.222222	0.206897	0.189655	0.1875	0.213333	0.075	0.0576923	0.0263158	0.142857	0.125	0.167883	0.171053	0.0285714	0.135135	0.0522876	0.153846	0.0740741	0.173913	0.027027	0.0394737	0.181818	0.102041	0.191781	0.576923	0.209302	0.15493	0.291667	0.211538	0.265823	0.097561	0.409091
109389	Island	0.25	0.909091	0.816327	0.3125	0.369565	0.311475	0.181818	0.589744	0.1	0.384615	0.341463	0.666667	0.0952381	0.273684	0.137931	0.235294	0.223881	0.243243	0.27451	0.22449	0.212766	0.258065	0.0833333	0.0576923	0.078125	0.142857	0.114286	0.196581	0.164179	0.016129	0.138889	0.0551724	0.173913	0.116883	0.1	0.0217391	0.0704225	0.225	0.121951	0.126761	0.666667	0.225	0.171875	0.292135	0.195652	0.2875	0.027027	0.470588
109391	Island	0.283019	0.949153	0.761905	0.265306	0.333333	0.269231	0.188679	0.588235	0.0851064	0.413333	0.292683	0.589744	0.0819672	0.255814	0.163636	0.245902	0.233333	0.25	0.25	0.226415	0.219512	0.272727	0.0857143	0.05	0.0526316	0.176471	0.0833333	0.227273	0.112903	0.0188679	0.138889	0.0373134	0.175439	0.0897436	0.1	0.021978	0.078125	0.243243	0.121951	0.19697	0.777778	0.264706	0.15873	0.303371	0.263158	0.267606	0.0588235	0.533333
109393	Island	0.269231	0.820896	0.727273	0.25	0.342857	0.269231	0.160714	0.571429	0.0909091	0.472973	0.384615	0.595238	0.111111	0.211111	0.156863	0.278689	0.245902	0.272727	0.266667	0.211538	0.219512	0.266667	0.0428571	0.0465116	0.0555556	0.181818	0.0967742	0.20354	0.166667	0.0178571	0.178082	0.0307692	0.164179	0.0821918	0.128205	0.0206186	0.1	0.236842	0.102564	0.208955	0.653846	0.3125	0.2	0.309524	0.228571	0.235294	0.0571429	0.466667
109395	Island	0.294118	0.880597	0.767442	0.267857	0.314286	0.27451	0.147541	0.571429	0.08	0.466667	0.390244	0.545455	0.0923077	0.238636	0.140351	0.306452	0.206349	0.220588	0.282609	0.25	0.214286	0.278689	0.0447761	0.0697674	0.0545455	0.176471	0.114754	0.215517	0.153846	0.0169492	0.173913	0.0384615	0.2	0.0945946	0.135135	0.0194175	0.101449	0.25641	0.135135	0.214286	0.75	0.277778	0.169492	0.313953	0.264706	0.239437	0.0606061	0.4375
109399	Island	0.423729	0.886076	0.904762	0.380952	0.372093	0.271186	0.136986	0.541667	0.0655738	0.519481	0.452381	0.584906	0.102941	0.265306	0.191781	0.269841	0.242857	0.24	0.333333	0.180328	0.272727	0.253731	0.027027	0.0769231	0.015873	0.189189	0.144928	0.26087	0.166667	0.0136986	0.166667	0.0434783	0.194444	0.097561	0.0652174	0.0173913	0.0740741	0.307692	0.155556	0.191781	0.8	0.425	0.177419	0.301075	0.277778	0.222222	0.0588235	0.363636
109405	Island	0.368421	0.853659	0.816327	0.34375	0.347826	0.21875	0.133333	0.531915	0.056338	0.358974	0.469388	0.59322	0.115942	0.296703	0.133333	0.28125	0.26087	0.164384	0.222222	0.190476	0.243902	0.238095	0.0481928	0.104167	0.0166667	0.142857	0.228916	0.283333	0.195652	0.0394737	0.141026	0.0514706	0.168831	0.0769231	0.0789474	0.0168067	0.0568182	0.153846	0.28	0.197368	0.76	0.540541	0.189655	0.322581	0.242424	0.166667	0.0285714	0.363636
109407	Island	0.368421	0.935065	0.956522	0.359375	0.372093	0.238095	0.119048	0.543478	0.0294118	0.369863	0.469388	0.603448	0.119403	0.290323	0.168831	0.3125	0.230769	0.180556	0.234043	0.180328	0.25	0.245902	0.0625	0.106383	0.0166667	0.193548	0.222222	0.29661	0.204545	0.0133333	0.177215	0.0514706	0.202703	0.114943	0.0833333	0.0438596	0.0853659	0.24	0.28	0.152778	0.791667	0.527778	0.245614	0.373626	0.225806	0.178571	0.030303	0.380952
452907	Open Sea	0.391304	0.682927	0.357143	0.647059	0.757576	0.52	0.555556	0.954545	0.6875	0.648148	0.435897	0.459459	0.464286	0.41791	0.464286	0.349206	0.533333	0.46875	0.509091	0.322581	0.315789	0.65	0.322581	0.2	0.228571	0.2	0.64	0.68	0.333333	0.366667	0.482759	0.638298	0.142857	0.588235	0.0689655	0.333333	0.15	0.357143	0.619048	0.583333	0.541667	0.380952	0.658537	0.581395	0.703704	0.744186	0.777778	0.625
1017329	Open Sea	0.769231	0.592593	0.322581	0.580247	0.795918	0.509091	0.555556	0.932203	0.741935	0.554217	0.469388	0.738095	0.596154	0.541667	0.615385	0.538462	0.485714	0.333333	0.64	0.482759	0.484848	0.625	0.567568	0.482759	0.403846	0.315789	0.47619	0.533333	0.45098	0.594595	0.568182	0.484211	0.686567	0.506024	0.48	0.483146	0.442623	0.586207	0.793103	0.833333	0.875	0.853659	0.746667	0.827586	0.666667	0.80198	0.903226	0.809524
1188543	Open Sea	0.607843	0.95	0.911765	0.37037	0.84	0.25	0.276596	0.655172	0.125	0.489362	0.410256	0.666667	0.166667	0.488372	0.0285714	0.358974	0.192308	0.25	0.392857	0.346154	0.0833333	0.268293	0.148148	0.15	0.030303	0.25	0.266667	0.292308	0.238095	0.08	0.121951	0.0724638	0.181818	0.153846	0.136364	0.0833333	0.03125	0.214286	0.125	0.217391	0.6	0.416667	0.275862	0.325581	0.227273	0.425532	0.235294	0.4
2068891	Open Sea	0.577778	0.728571	0.307692	0.451613	0.630435	0.813953	0.623377	0.9	0.357143	0.465753	0.45283	0.545455	0.5	0.422222	0.310345	0.206897	0.571429	0.65	0.4375	0.403509	0.681818	0.574468	0.461538	0.72	0.326531	0.357143	0.875	0.788732	0.4	0.530612	0.204545	0.515789	0.266667	0.538462	0.44186	0.480769	0.26	0.6	0.787879	0.857143	0.851852	0.875	0.628571	0.833333	0.769231	0.89011	0.64	0.708333
2687985	Open Sea	0.576271	0.6	0.42	0.604651	0.55	0.517857	0.397436	0.730769	0.387755	0.302326	0.479167	0.518519	0.533333	0.241379	0.5	0.288889	0.537037	0.475	0.574468	0.648649	0.37037	0.732143	0.463415	0.485714	0.441176	0.357143	0.534884	0.445652	0.45	0.566667	0.361702	0.753086	0.305556	0.653061	0.444444	0.743243	0.272727	0.357143	0.939394	0.78	0.793103	0.962963	0.875	0.825	0.906977	0.95098	0.897436	0.954545
2687999	Open Sea	0.47	0.526316	0.466667	0.666667	0.555556	0.516484	0.468254	0.592105	0.35	0.377953	0.520408	0.414634	0.55102	0.405797	0.577586	0.430233	0.550562	0.447368	0.583333	0.671875	0.645833	0.484536	0.506494	0.477273	0.454545	0.333333	0.60241	0.452055	0.454545	0.505618	0.375	0.787097	0.483146	0.631579	0.342105	0.75969	0.318182	0.852941	0.9	0.829545	0.863636	0.954545	0.967391	0.942857	0.923077	0.971014	0.9	0.9
2688003	Open Sea	0.438776	0.536082	0.575342	0.7	0.640625	0.581081	0.391667	0.621212	0.346154	0.487603	0.559524	0.453333	0.542553	0.398374	0.616071	0.493506	0.577778	0.558824	0.578313	0.651515	0.609756	0.566667	0.466667	0.314286	0.576271	0.333333	0.654321	0.57554	0.581081	0.472222	0.4375	0.786207	0.444444	0.643678	0.40625	0.776786	0.362069	0.821429	0.906977	0.9125	0.923077	0.895833	0.95	0.961165	0.981481	0.991736	0.978723	0.882353
2688005	Open Sea	0.44	0.666667	0.632353	0.691176	0.634921	0.534247	0.4	0.651515	0.346154	0.401639	0.458824	0.486842	0.380435	0.471545	0.546296	0.513158	0.47191	0.5	0.475	0.478261	0.525	0.511111	0.459459	0.242424	0.310345	0.5	0.60241	0.474453	0.438356	0.521127	0.333333	0.697183	0.391892	0.549451	0.40625	0.792793	0.355932	0.714286	0.977778	0.810127	0.975	0.895833	0.848101	0.942308	0.981818	0.941176	0.893617	0.870968
2688007	Open Sea	0.375	0.542553	0.560606	0.641791	0.557377	0.383562	0.327731	0.507692	0.319149	0.299145	0.477273	0.378378	0.397727	0.381356	0.518868	0.375	0.409091	0.347826	0.473684	0.550725	0.377778	0.5	0.347222	0.264706	0.327273	0.294118	0.547619	0.492188	0.402778	0.405797	0.355932	0.654135	0.32	0.511628	0.321429	0.688679	0.264151	0.655172	0.97619	0.805556	0.891892	0.866667	0.835443	0.946809	0.981481	0.983051	0.959184	0.84375
2688015	Open Sea	0.22619	0.439024	0.553571	0.530612	0.408163	0.352941	0.235294	0.537037	0.15	0.191489	0.289855	0.259259	0.2	0.201923	0.412371	0.213333	0.3125	0.163934	0.298507	0.428571	0.324324	0.394366	0.246377	0.4	0.107143	0.157895	0.375	0.291667	0.283333	0.313433	0.285714	0.584071	0.111111	0.392857	0.222222	0.654762	0.177778	0.517241	0.666667	0.650794	0.735294	0.704545	0.777778	0.896104	0.97619	0.903509	0.875	0.827586
2688019	Open Sea	0.193548	0.267606	0.0465116	0.333333	0.384615	0.396226	0.13253	0.45283	0.0769231	0.104478	0.25	0.214286	0.19403	0.0721649	0.27027	0.0606061	0.214286	0.116667	0.204082	0.288462	0.0689655	0.389831	0.137931	0.107143	0.0727273	0.0666667	0.337662	0.1875	0.145455	0.241935	0.155172	0.353535	0.0166667	0.213333	0.217391	0.57971	0.0227273	0.384615	0.74359	0.631579	0.689655	0.810811	0.666667	0.862745	0.645161	0.838384	0.742857	0.705882
2688023	Open Sea	0.153846	0.263158	0.196429	0.243902	0.317073	0.362319	0.115385	0.5	0.114286	0.135802	0.351852	0.169811	0.0769231	0.113402	0.282051	0.160714	0.269231	0.123077	0.258065	0.264151	0.185185	0.36	0.148148	0.0357143	0.0384615	0.047619	0.202703	0.156863	0.15	0.213333	0.208955	0.366337	0.0135135	0.15493	0.117647	0.457143	0.0588235	0.153846	0.533333	0.660714	0.612903	0.657143	0.686275	0.733333	0.703704	0.811881	0.607143	0.571429
2688027	Open Sea	0.177419	0.292683	0.237288	0.255814	0.333333	0.342466	0.190476	0.5	0.0882353	0.09375	0.232558	0.2	0.20339	0.177083	0.410959	0.22449	0.307692	0.183333	0.193548	0.428571	0.25	0.470588	0.173077	0.0344828	0.208333	0.0869565	0.174603	0.232143	0.272727	0.306667	0.229508	0.416667	0.0273973	0.292308	0.444444	0.784615	0.18	0.384615	0.689655	0.76087	0.833333	0.875	0.85	0.789474	0.875	0.877778	0.736842	0.8
2785837	Open Sea	0.777778	0.904762	0.833333	0.857143	0.75	0.958333	0.655172	0.869565	0.833333	0.690476	0.619048	0.607143	0.684211	0.357143	0.5	0.428571	0.407407	0.466667	0.513514	0.25	0.428571	0.62963	0.6	0.4375	0.25	0.5	0.515152	0.367347	0.391304	0.304348	0.470588	0.354167	0.416667	0.444444	0.6	0.409091	0.4	0.4	0.4	0.272727	0.916667	0.454545	0.666667	0.636364	0.785714	0.613636	0.583333	0.769231
2819445	Open Sea	0.461538	0.857143	0.677966	0.5	0.571429	0.470588	0.290909	0.75	0.153846	0.359375	0.194444	0.513514	0.152174	0.392405	0.311688	0.350877	0.290323	0.173077	0.191489	0.395349	0.310345	0.44898	0.351852	0.173913	0.184211	0.259259	0.172414	0.37037	0.181818	0.0294118	0.238095	0.171717	0.276596	0.304348	0.25	0.0677966	0.113636	0.21875	0.2	0.522727	0.694444	0.35	0.348837	0.5	0.451613	0.384615	0.318182	0.294118
3137091	Open Sea	0.695652	0.503226	0.681818	0.484848	0.4125	0.545455	0.466667	0.491379	0.288136	0.561983	0.597701	0.505495	0.577778	0.457364	0.322835	0.278846	0.390805	0.336449	0.284091	0.349515	0.54386	0.418919	0.422018	0.45098	0.257143	0.447368	0.386139	0.441176	0.361446	0.320755	0.450549	0.357542	0.305556	0.403226	0.40625	0.282443	0.276596	0.409091	0.603774	0.6125	0.833333	0.689655	0.756098	0.698925	0.697674	0.75	0.738095	0.777778
3137097	Open Sea	0.45082	0.534031	0.625	0.282353	0.387097	0.534722	0.323944	0.407143	0.25	0.5	0.47	0.491071	0.422764	0.383721	0.264151	0.286822	0.38	0.28125	0.275862	0.322581	0.337662	0.37037	0.302326	0.283333	0.2	0.396226	0.413223	0.417178	0.240741	0.248	0.409524	0.247706	0.155844	0.263158	0.428571	0.186335	0.181034	0.344828	0.533333	0.5	0.837838	0.637681	0.705882	0.714286	0.583333	0.73494	0.655172	0.666667
3137187	Open Sea	0.774648	0.719101	0.885714	0.76087	0.770492	0.915254	0.55814	0.831461	0.446809	0.835443	0.813333	0.735849	0.569231	0.66	0.489796	0.5	0.46	0.586957	0.509804	0.590909	0.705882	0.586207	0.368421	0.580645	0.396226	0.369565	0.53125	0.493976	0.365385	0.240741	0.477612	0.401709	0.484848	0.368421	0.591837	0.293651	0.435484	0.411765	0.553191	0.666667	0.961538	0.755556	0.80597	0.75	0.475	0.744898	0.714286	0.821429
4058507	Open Sea	0.489796	0.603175	0.75	0.730769	0.333333	0.65	0.22449	0.707317	0.290323	0.596774	0.309524	0.425532	0.52381	0.405797	0.333333	0.422222	0.241379	0.307692	0.333333	0.395349	0.666667	0.507463	0.375	0.387097	0.146341	0.290323	0.4375	0.22093	0.431818	0.268293	0.432432	0.34375	0.326923	0.253968	0.15	0.32	0.189189	0.347826	0.363636	0.46	0.818182	0.571429	0.542857	0.5	0.645833	0.666667	0.56	0.8125
4093811	Open Sea	0.321429	0.214286	0.481481	0.366667	0.56	0.382353	0.113636	0.45	0.173913	0.181818	0.214286	0.047619	0.125	0.262295	0.262295	0.171429	0.3	0.18	0.125	0.204545	0.333333	0.173913	0.146341	0.103448	0.06	0.222222	0.263158	0.261905	0.119048	0.117647	0.25	0.181818	0.191489	0.0909091	0.2	0.37037	0.214286	0.318182	0.689655	0.534884	0.484848	0.275862	0.487179	0.85	0.454545	0.436364	0.592593	0.352941
4093813	Open Sea	0.428571	0.295455	0.518519	0.548387	0.740741	0.485714	0.377778	0.763158	0.26087	0.318182	0.348837	0.2	0.142857	0.290323	0.283582	0.2	0.254545	0.230769	0.454545	0.227273	0.323529	0.270833	0.186047	0.275862	0.352941	0.166667	0.526316	0.356322	0.261905	0.333333	0.414634	0.3	0.24	0.253731	0.3	0.423077	0.302326	0.47619	0.848485	0.568182	0.636364	0.375	0.589744	0.928571	0.6	0.464286	0.714286	0.375
4093815	Open Sea	0.428571	0.288889	0.333333	0.5	0.551724	0.416667	0.276596	0.621622	0.208333	0.291667	0.234043	0.0952381	0.243243	0.30303	0.333333	0.205128	0.309091	0.192308	0.388889	0.163265	0.342857	0.326531	0.2	0.285714	0.196078	0.194444	0.315789	0.313953	0.111111	0.326923	0.363636	0.273973	0.306122	0.283582	0.285714	0.309091	0.136364	0.473684	0.8	0.577778	0.69697	0.323529	0.6	0.844444	0.72	0.45	0.612903	0.411765
4125377	Island	0.878049	0.9375	0.928571	0.921053	0.954545	0.884615	0.941176	0.9375	0.85	0.777778	0.884615	0.714286	0.942857	0.943396	0.574468	0.744681	0.857143	0.625	0.875	0.725	0.68	0.870968	0.71875	0.882353	0.52381	0.846154	0.702128	0.802817	0.577778	0.8	0.969697	0.773196	0.738095	0.825	0.814815	0.733333	0.594595	0.857143	0.8	0.947368	0.909091	0.888889	0.972222	0.977778	0.95	0.90625	1	0.9
4125379	Island	0.911111	0.944444	0.896552	0.921053	0.904762	1	0.923077	0.972222	0.714286	0.865385	0.814815	0.673913	0.74359	0.690909	0.76	0.72	0.827586	0.695652	0.8125	0.604651	0.576923	0.852941	0.787879	0.909091	0.76087	0.933333	0.807692	0.808219	0.607843	0.866667	0.852941	0.685714	0.840909	0.755556	0.903226	0.870968	0.675	0.954545	0.904762	0.95	1	0.904762	0.972222	0.959184	0.96	1	0.75	1
4125381	Island	0.931818	0.836364	0.935484	0.95	0.791667	0.8125	0.76087	0.972222	0.7	0.6	0.758621	0.386364	0.714286	0.574074	0.615385	0.528302	0.676471	0.529412	0.588235	0.510638	0.419355	0.676471	0.714286	0.666667	0.423077	0.882353	0.603774	0.607595	0.537037	0.520833	0.891892	0.555556	0.543478	0.608696	0.5625	0.878788	0.372093	0.84	0.55	0.952381	0.857143	0.84	0.853659	0.94	0.925926	0.890411	0.842105	0.714286
4125383	Island	0.978261	0.90566	1	0.85	0.84	0.842105	0.77551	0.904762	0.631579	0.551282	0.833333	0.344828	0.804348	0.571429	0.537037	0.580645	0.540541	0.5	0.483871	0.576923	0.4375	0.615385	0.658537	0.638889	0.483871	0.888889	0.481481	0.579545	0.473684	0.571429	0.763158	0.394737	0.568627	0.714286	0.214286	0.638889	0.4	0.846154	0.772727	0.934783	0.722222	0.72	0.866667	0.934783	0.931034	0.935065	0.666667	0.857143
4125385	Island	0.978261	0.836364	1	1	0.92	0.815789	0.96	0.880952	0.833333	0.759494	0.774194	0.736842	0.787234	0.68254	0.526316	0.666667	0.594595	0.648148	0.709677	0.538462	0.75	0.736842	0.772727	0.666667	0.6	0.888889	0.563636	0.577778	0.631579	0.72549	0.906977	0.632479	0.72	0.66	0.555556	0.914286	0.565217	0.814815	0.681818	0.893617	0.947368	0.851852	0.913043	0.957447	1	0.949367	0.916667	0.904762
4125387	Island	0.979167	0.881356	0.966667	0.914286	0.892857	0.85	0.909091	0.928571	0.8	0.701299	0.64	0.480769	0.75	0.507692	0.453125	0.59375	0.564103	0.423077	0.642857	0.588235	0.62069	0.828571	0.659091	0.628571	0.433333	0.9375	0.344828	0.545455	0.627119	0.769231	0.783784	0.547826	0.58	0.458333	0.407407	0.805556	0.44898	0.875	0.56	0.957447	0.722222	0.814815	0.847826	0.897959	0.8	0.974026	0.72	0.857143
4125389	Island	0.782609	0.857143	0.84375	0.628571	0.703704	0.6	0.563636	0.619048	0.4	0.328947	0.4	0.25	0.5	0.366667	0.258065	0.31746	0.447368	0.288462	0.413793	0.26	0.517241	0.571429	0.261905	0.441176	0.118644	0.75	0.210526	0.304348	0.305085	0.471698	0.564103	0.387387	0.24	0.265306	0.37037	0.714286	0.297872	0.5	0.6	0.717391	0.294118	0.555556	0.744186	0.638298	0.733333	0.730769	0.695652	0.571429
4125391	Island	0.822222	0.875	0.71875	0.703704	0.76	0.675	0.4	0.853659	0.5625	0.52439	0.347826	0.333333	0.5	0.245902	0.287879	0.40678	0.394737	0.320755	0.322581	0.23913	0.310345	0.6	0.324324	0.433333	0.258621	0.8125	0.148148	0.325581	0.241379	0.372549	0.65	0.343137	0.340909	0.170213	0.148148	0.615385	0.195652	0.541667	0.521739	0.729167	0.529412	0.62963	0.809524	0.680851	0.833333	0.893333	0.681818	0.8
4125393	Island	0.977778	0.816327	0.774194	0.73913	0.571429	0.658537	0.574074	0.880952	0.4	0.4	0.392857	0.277778	0.357143	0.241379	0.184615	0.172414	0.352941	0.267857	0.344828	0.22	0.275862	0.395349	0.228571	0.428571	0.0508475	0.6875	0.26	0.295455	0.137931	0.361702	0.575	0.202247	0.166667	0.18	0.142857	0.675	0.222222	0.333333	0.52381	0.7	0.421053	0.653846	0.658537	0.73913	0.8125	0.739726	0.454545	0.52381
4125395	Island	0.733333	0.734694	0.612903	0.652174	0.392857	0.547619	0.185185	0.731707	0.3125	0.297619	0.222222	0.176471	0.395349	0.155172	0.109375	0.172414	0.216216	0.153846	0.2	0.244898	0.166667	0.348837	0.323529	0.142857	0.137931	0.625	0.125	0.181818	0.122807	0.282609	0.378378	0.133333	0.121951	0.104167	0.115385	0.439024	0.155556	0.434783	0.25	0.632653	0.421053	0.2	0.4	0.545455	0.483871	0.685714	0.5	0.545455
4125397	Island	1	0.86	0.941176	0.84	0.766667	0.75	0.709091	0.926829	0.6875	0.690476	0.592593	0.428571	0.714286	0.448276	0.5	0.440678	0.435897	0.372549	0.483871	0.408163	0.516129	0.555556	0.742857	0.5	0.403509	0.733333	0.377778	0.393258	0.438596	0.425532	0.710526	0.366667	0.52381	0.531915	0.32	0.725	0.446809	0.727273	0.666667	0.93617	0.75	0.791667	0.804878	0.916667	0.78125	0.985714	0.782609	0.8
4125399	Island	0.888889	0.807692	0.705882	0.62963	0.689655	0.717391	0.509091	0.804878	0.75	0.440476	0.333333	0.1875	0.522727	0.241935	0.21875	0.232143	0.307692	0.145833	0.375	0.208333	0.5	0.456522	0.457143	0.291667	0.267857	0.764706	0.155556	0.243902	0.203704	0.354167	0.567568	0.23913	0.190476	0.25	0.230769	0.511628	0.288889	0.409091	0.6	0.75	0.55	0.708333	0.659091	0.770833	0.78125	0.873239	0.652174	0.571429
4125401	Island	0.886364	0.755102	0.774194	0.666667	0.666667	0.666667	0.509804	0.894737	0.666667	0.487805	0.241379	0.204082	0.458333	0.241935	0.360656	0.232143	0.190476	0.24	0.189189	0.28	0.321429	0.444444	0.4375	0.434783	0.109091	0.705882	0.255319	0.3	0.269231	0.291667	0.666667	0.2	0.181818	0.3	0.307692	0.447368	0.097561	0.5	0.533333	0.782609	0.55	0.695652	0.658537	0.804348	0.833333	0.820896	0.565217	0.684211
4125403	Island	1	0.941176	0.75	0.833333	0.888889	0.902439	0.891304	0.921053	1	0.825	0.862069	0.76	0.851064	0.656716	0.716667	0.732143	0.707317	0.666667	0.742857	0.729167	0.78125	0.795455	1	0.95	0.775862	0.764706	0.787234	0.807692	0.877551	0.772727	0.945946	0.8	0.733333	0.690909	0.689655	0.974359	0.609756	0.75	1	0.957447	0.8	0.952381	0.880952	1	0.972222	0.984375	0.92	1
4125405	Island	0.948718	0.977778	0.862069	0.952381	0.703704	0.891892	0.928571	0.921053	0.9	0.837838	0.84	0.673469	0.808511	0.848485	0.736842	0.614035	0.648649	0.72093	0.866667	0.555556	0.6875	0.794872	0.911765	0.894737	0.82	0.941176	0.755556	0.721519	0.744681	0.923077	0.8	0.759494	0.72093	0.745455	0.541667	0.794872	0.575	0.863636	1	0.880952	0.888889	1	0.897436	0.978261	0.947368	0.968254	0.833333	0.944444
4125407	Island	0.942857	0.8	0.925926	0.6875	0.62069	0.685714	0.682927	0.864865	0.857143	0.774648	0.615385	0.5625	0.613636	0.5	0.407407	0.5	0.578947	0.609756	0.633333	0.536585	0.703704	0.605263	0.7	0.588235	0.477273	0.714286	0.547619	0.529412	0.560976	0.677419	0.78125	0.44	0.574468	0.592593	0.461538	0.714286	0.432432	0.636364	0.9	0.857143	0.882353	0.952381	0.794118	0.883721	0.916667	0.945455	0.791667	1
4543665	Open Sea	0.552632	0.444444	0.690909	0.375	0.341463	0.746269	0.612903	0.744681	0.517241	0.594203	0.52	0.343284	0.48	0.419355	0.352941	0.415094	0.480769	0.461538	0.324324	0.605263	0.681818	0.509434	0.571429	0.28	0.230769	0.5	0.568182	0.504505	0.253521	0.431373	0.371429	0.45679	0.263889	0.461538	0.5	0.245614	0.380952	0.352941	0.9375	0.644444	0.952381	0.47619	0.628571	0.714286	0.939394	0.873239	0.454545	0.62963
4543671	Open Sea	0.5	0.548387	0.783784	0.590909	0.275	0.625	0.589286	0.666667	0.391304	0.465517	0.470588	0.333333	0.291667	0.27451	0.25	0.4	0.5625	0.235294	0.36	0.342105	0.411765	0.414634	0.326923	0.222222	0.130435	0.409091	0.578947	0.4	0.236364	0.333333	0.272727	0.424242	0.267606	0.555556	0.518519	0.363636	0.2	0.238095	0.588235	0.375	0.636364	0.444444	0.548387	0.695652	0.807692	0.803922	0.619048	0.315789
4543697	Island	0.522727	0.526316	0.782609	0.545455	0.477273	0.518519	0.75	0.565217	0.6	0.6875	0.254545	0.422222	0.385965	0.214286	0.38	0.37931	0.615385	0.204545	0.261905	0.615385	0.585366	0.461538	0.351351	0.181818	0.222222	0.461538	0.6	0.596774	0.162791	0.266667	0.3125	0.605634	0.348837	0.537037	0.391304	0.27907	0.386364	0.466667	0.925926	0.75	0.6875	0.692308	0.526316	0.666667	1	0.742424	0.428571	0.3
4543699	Island	0.590909	0.506494	1	0.7	0.466667	0.703704	0.727273	0.608696	0.8	0.666667	0.313725	0.581395	0.526316	0.491525	0.403846	0.517241	0.64	0.288889	0.261905	0.575	0.585366	0.564103	0.378378	0.290323	0.185185	0.583333	0.677419	0.66129	0.309524	0.288136	0.3125	0.486111	0.348837	0.716981	0.541667	0.275	0.431818	0.5625	0.962963	0.727273	0.875	0.538462	0.717949	0.794872	1	0.779412	0.47619	0.5
4543701	Island	0.72093	0.641026	1	0.6	0.545455	0.83871	0.761905	0.625	0.5	0.757576	0.264151	0.533333	0.45614	0.515625	0.45283	0.689655	0.615385	0.4	0.285714	0.65	0.564103	0.615385	0.421053	0.387097	0.241379	0.384615	0.645161	0.539683	0.295455	0.262295	0.484848	0.561644	0.44186	0.696429	0.52381	0.35	0.431818	0.333333	0.888889	0.73913	0.823529	0.769231	0.769231	0.65	1	0.84058	0.285714	0.5
4543709	Island	0.609756	0.61194	0.952381	0.464286	0.487805	0.8125	0.851064	0.645161	0.7	0.701493	0.349206	0.469388	0.507692	0.428571	0.388889	0.594595	0.5	0.382979	0.288889	0.642857	0.621622	0.634146	0.619048	0.3	0.4	0.470588	0.676471	0.650794	0.163265	0.355932	0.461538	0.594595	0.407407	0.796296	0.5	0.5	0.458333	0.363636	0.96	0.836735	0.789474	0.8	0.840909	0.702128	0.916667	0.90411	0.65	0.636364
4543711	Island	0.446809	0.57971	0.814815	0.428571	0.413043	0.628571	0.617021	0.625	0.428571	0.485294	0.149254	0.350877	0.380952	0.285714	0.253968	0.378378	0.40625	0.226415	0.304348	0.5	0.380952	0.565217	0.333333	0.206897	0.186047	0.291667	0.648649	0.393939	0.169492	0.137931	0.333333	0.469136	0.350877	0.527273	0.28	0.309091	0.245283	0.333333	0.821429	0.714286	0.578947	0.538462	0.688889	0.627451	0.928571	0.686747	0.285714	0.533333
4543713	Island	0.5	0.642857	0.814815	0.448276	0.377778	0.647059	0.695652	0.625	0.5625	0.507463	0.2	0.410714	0.459016	0.25974	0.370968	0.45	0.514286	0.226415	0.4	0.473684	0.439024	0.44898	0.386364	0.258065	0.125	0.333333	0.648649	0.451613	0.155172	0.155172	0.266667	0.476744	0.339623	0.480769	0.416667	0.22807	0.313725	0.363636	0.961538	0.541667	0.571429	0.518519	0.55814	0.607843	0.846154	0.860759	0.55	0.533333
4543715	Island	0.604167	0.676471	0.923077	0.448276	0.434783	0.823529	0.777778	0.612903	0.4375	0.606061	0.21519	0.403509	0.525424	0.423077	0.387097	0.487179	0.571429	0.196078	0.363636	0.589744	0.512821	0.531915	0.391304	0.258065	0.121951	0.375	0.702703	0.532258	0.122807	0.133333	0.333333	0.590361	0.415094	0.574074	0.44	0.305085	0.339623	0.454545	0.928571	0.770833	0.590909	0.703704	0.785714	0.74	1	0.777778	0.5	0.866667
4543717	Island	0.511111	0.73913	0.857143	0.548387	0.454545	0.805556	0.75	0.611111	0.526316	0.656716	0.282051	0.534483	0.381818	0.453333	0.377049	0.534884	0.529412	0.27451	0.488889	0.525	0.538462	0.612245	0.5	0.34375	0.268293	0.347826	0.638889	0.651515	0.20339	0.362069	0.391304	0.609756	0.384615	0.592593	0.541667	0.387097	0.346154	0.416667	0.962963	0.826087	0.6	0.769231	0.85	0.884615	0.785714	0.86747	0.73913	0.722222
4543719	Island	0.522727	0.758065	0.888889	0.483871	0.477273	0.815789	0.837209	0.657143	0.55	0.666667	0.465753	0.603774	0.462963	0.578947	0.559322	0.55	0.583333	0.296296	0.555556	0.589744	0.583333	0.659574	0.434783	0.34375	0.214286	0.44	0.75	0.612903	0.241379	0.37037	0.4375	0.670886	0.431373	0.64	0.521739	0.491803	0.372549	0.5	1	0.851064	0.666667	0.8	0.897436	0.846154	0.928571	0.86747	0.761905	0.833333
4543721	Island	0.318182	0.645161	0.884615	0.34375	0.333333	0.675676	0.674419	0.4	0.526316	0.352941	0.211268	0.407407	0.22	0.350649	0.275862	0.307692	0.4	0.132075	0.422222	0.487179	0.333333	0.422222	0.380952	0.125	0.119048	0.166667	0.555556	0.433333	0.157895	0.222222	0.130435	0.381579	0.283019	0.428571	0.318182	0.180328	0.25	0.333333	0.84	0.680851	0.388889	0.576923	0.538462	0.826923	0.714286	0.682927	0.545455	0.888889
4543723	Island	0.395349	0.586207	0.740741	0.483871	0.477273	0.657143	0.634146	0.65625	0.333333	0.424242	0.271429	0.5	0.352941	0.351351	0.368421	0.394737	0.411765	0.235294	0.465116	0.447368	0.542857	0.571429	0.358974	0.3	0.0243902	0.272727	0.606061	0.442623	0.218182	0.178571	0.282609	0.441558	0.25	0.545455	0.380952	0.262295	0.2	0.454545	1	0.66	0.578947	0.625	0.585366	0.840909	0.882353	0.739726	0.45	0.764706
4543725	Island	0.386364	0.629032	0.851852	0.515152	0.333333	0.702703	0.536585	0.65625	0.35	0.492537	0.253521	0.527273	0.27451	0.333333	0.357143	0.459459	0.441176	0.215686	0.309524	0.578947	0.388889	0.547619	0.317073	0.166667	0.05	0.318182	0.735294	0.540984	0.163636	0.157895	0.133333	0.5	0.313725	0.477273	0.318182	0.196721	0.219512	0.333333	0.956522	0.645833	0.631579	0.708333	0.756098	0.883721	0.823529	0.739726	0.6	0.705882
4543731	Island	0.410256	0.527273	0.714286	0.645161	0.395349	0.806452	0.611111	0.677419	0.4	0.4	0.203125	0.392857	0.350877	0.382716	0.490196	0.324324	0.421053	0.234043	0.388889	0.6	0.424242	0.636364	0.432432	0.238095	0.191489	0.173913	0.55	0.5	0.24	0.318182	0.340426	0.565217	0.212766	0.4375	0.25	0.320755	0.307692	0.5	0.941176	0.7	0.733333	0.695652	0.8	0.902439	0.882353	0.797297	0.777778	0.8125
4543733	Island	0.447368	0.471698	0.7	0.464286	0.372093	0.677419	0.483871	0.666667	0.3	0.392857	0.121212	0.3	0.285714	0.320513	0.538462	0.277778	0.475	0.234043	0.411765	0.484848	0.470588	0.534884	0.432432	0.217391	0.133333	0.2	0.589744	0.509804	0.259259	0.179487	0.302326	0.455882	0.285714	0.611111	0.375	0.27451	0.225	0.6	0.823529	0.619048	0.625	0.727273	0.666667	0.878049	0.736842	0.850746	0.777778	0.692308
4543751	Island	0.473684	0.516667	0.837838	0.68	0.394737	0.731707	0.533333	0.461538	0.375	0.380952	0.214286	0.270833	0.365385	0.328947	0.405405	0.230769	0.459459	0.269231	0.292683	0.527778	0.538462	0.552632	0.294118	0.0625	0.0769231	0.210526	0.404762	0.584906	0.285714	0.255814	0.466667	0.342105	0.155556	0.697674	0.388889	0.138889	0.243902	0.4	0.923077	0.697674	0.722222	0.666667	0.709677	0.892857	0.8	0.622222	0.6	0.8
4543753	Island	0.425	0.561404	0.694444	0.8	0.486486	0.711111	0.5	0.68	0.272727	0.492063	0.140351	0.270833	0.192308	0.253333	0.35	0.236842	0.378378	0.132075	0.275	0.485714	0.538462	0.55	0.25	0.05	0.0952381	0.142857	0.35	0.461538	0.229167	0.205128	0.409091	0.361111	0.1875	0.465116	0.210526	0.151515	0.170732	0.307692	0.833333	0.622222	0.75	0.625	0.606061	0.903226	0.809524	0.590909	0.705882	0.5
4543755	Island	0.261905	0.508772	0.621622	0.5	0.2	0.465116	0.206897	0.461538	0.173913	0.186441	0.0714286	0.102041	0.211538	0.164557	0.292683	0.131579	0.315789	0.115385	0.1	0.342857	0.307692	0.368421	0.195122	0.1	0.0731707	0.0454545	0.25641	0.306122	0.234043	0.230769	0.173913	0.189189	0.0869565	0.355556	0.25	0.0606061	0.0731707	0.214286	0.692308	0.377778	0.529412	0.25	0.40625	0.62069	0.52381	0.428571	0.470588	0.3125
4543757	Island	0.512195	0.586207	0.692308	0.84	0.388889	0.777778	0.538462	0.653846	0.347826	0.508772	0.245614	0.204082	0.307692	0.358974	0.4	0.289474	0.555556	0.269231	0.317073	0.571429	0.56	0.564103	0.309524	0.190476	0.170732	0.363636	0.526316	0.541667	0.291667	0.325	0.478261	0.426667	0.18	0.577778	0.315789	0.2	0.307692	0.6	0.846154	0.704545	0.882353	0.8125	0.65625	0.892857	0.8	0.790698	0.823529	0.647059
4543759	Island	0.534884	0.637931	0.795455	0.791667	0.378378	0.711111	0.551724	0.69697	0.391304	0.5	0.261538	0.352941	0.285714	0.304878	0.428571	0.35	0.447368	0.254545	0.395349	0.555556	0.48	0.625	0.232558	0.272727	0.136364	0.347826	0.5	0.509804	0.230769	0.358974	0.458333	0.447368	0.26	0.5	0.315789	0.236842	0.357143	0.529412	0.928571	0.636364	0.777778	0.833333	0.766667	0.8125	0.809524	0.702128	0.588235	0.611111
4543761	Island	0.512195	0.614035	0.73913	0.677419	0.5	0.727273	0.551724	0.692308	0.391304	0.396226	0.188406	0.294118	0.307692	0.3125	0.295455	0.363636	0.414634	0.214286	0.261905	0.527778	0.521739	0.652174	0.295455	0.190476	0.0952381	0.238095	0.571429	0.469388	0.137255	0.22449	0.340426	0.395062	0.211538	0.553191	0.470588	0.238095	0.238095	0.611111	0.75	0.736842	0.857143	0.6	0.588235	0.939394	0.666667	0.653846	0.625	0.4
4543763	Island	0.564103	0.642857	0.708333	0.733333	0.55	0.818182	0.586207	0.75	0.318182	0.574074	0.231884	0.387755	0.270833	0.275	0.543478	0.340909	0.512195	0.220339	0.452381	0.657895	0.636364	0.659091	0.25	0.15	0.111111	0.238095	0.585366	0.5	0.176471	0.294118	0.304348	0.444444	0.132075	0.693878	0.470588	0.212766	0.304348	0.526316	0.75	0.666667	0.818182	0.857143	0.676471	0.878788	0.789474	0.818182	0.6875	0.772727
4543765	Island	0.52381	0.701754	0.777778	0.678571	0.5	0.795455	0.645161	0.692308	0.347826	0.6	0.257143	0.4	0.270833	0.268293	0.581395	0.377778	0.463415	0.22807	0.26087	0.567568	0.52	0.652174	0.333333	0.157895	0.106383	0.375	0.547619	0.461538	0.134615	0.333333	0.369565	0.448718	0.185185	0.591837	0.421053	0.244898	0.361702	0.555556	0.8125	0.756098	0.857143	0.7	0.787879	0.875	0.789474	0.818182	0.8125	0.521739
4543767	Island	0.341463	0.633333	0.630435	0.733333	0.461538	0.666667	0.625	0.55102	0.391304	0.6	0.257576	0.240741	0.102041	0.316456	0.382979	0.288889	0.479167	0.22807	0.265306	0.560976	0.380952	0.730769	0.326531	0.166667	0.0408163	0.272727	0.577778	0.537037	0.178571	0.181818	0.309524	0.455696	0.113208	0.607843	0.368421	0.229167	0.354167	0.5	0.875	0.634146	0.636364	0.789474	0.722222	0.730769	0.55	0.689655	0.6875	0.636364
4543769	Island	0.625	0.6	0.808511	0.733333	0.575	0.708333	0.5625	0.734694	0.333333	0.645833	0.257576	0.245283	0.222222	0.358025	0.531915	0.377778	0.557692	0.280702	0.416667	0.604651	0.45	0.666667	0.333333	0.235294	0.0851064	0.434783	0.627907	0.472727	0.237288	0.25	0.463415	0.544304	0.169811	0.660377	0.454545	0.265306	0.367347	0.611111	0.8125	0.785714	0.863636	0.789474	0.805556	0.851852	0.8	0.790323	0.6875	0.583333
4543771	Island	0.666667	0.54386	0.638298	0.740741	0.571429	0.795918	0.69697	0.734694	0.458333	0.653061	0.402985	0.346154	0.354167	0.402597	0.574468	0.581395	0.607843	0.316667	0.4375	0.652174	0.52381	0.75	0.361702	0.222222	0.183673	0.590909	0.6	0.54386	0.350877	0.303571	0.52381	0.469136	0.226415	0.685185	0.375	0.346939	0.45098	0.555556	0.875	0.8	0.809524	0.842105	0.780488	0.827586	0.736842	0.90625	0.875	0.695652
4543775	Island	0.268293	0.581818	0.377778	0.548387	0.459459	0.446809	0.605263	0.618182	0.375	0.408163	0.289855	0.156863	0.340426	0.369048	0.38	0.4	0.46	0.216667	0.395833	0.456522	0.3125	0.66	0.367347	0.333333	0.0952381	0.380952	0.512195	0.365079	0.147541	0.206349	0.522727	0.383721	0.218182	0.576923	0.230769	0.470588	0.372881	0.55	0.529412	0.621622	0.64	0.533333	0.684211	0.482759	0.6875	0.652778	0.4375	0.478261
4543777	Island	0.428571	0.358491	0.468085	0.586207	0.588235	0.608696	0.589744	0.719298	0.56	0.553191	0.367647	0.428571	0.466667	0.448276	0.634615	0.261905	0.586957	0.163934	0.487179	0.521739	0.684211	0.574468	0.471698	0.192308	0.159091	0.470588	0.675	0.550725	0.253731	0.280702	0.55814	0.494118	0.370968	0.588235	0.4	0.285714	0.403226	0.73913	0.571429	0.74359	0.869565	0.705882	0.585366	0.793103	0.705882	0.775	0.461538	0.608696
4543779	Island	0.47619	0.339286	0.265306	0.612903	0.636364	0.822222	0.564103	0.77193	0.678571	0.622642	0.434783	0.454545	0.533333	0.375	0.592593	0.325	0.632653	0.298507	0.47619	0.547619	0.529412	0.630435	0.462963	0.192308	0.22449	0.578947	0.578947	0.560606	0.304348	0.305085	0.571429	0.658228	0.354839	0.630435	0.517241	0.42623	0.262295	0.608696	0.636364	0.685714	0.958333	0.777778	0.878049	0.866667	0.722222	0.837209	0.785714	0.791667
4543781	Island	0.756098	0.410714	0.46	0.806452	0.833333	0.818182	0.7	0.75	0.689655	0.740741	0.447761	0.666667	0.522727	0.402299	0.672727	0.555556	0.729167	0.419355	0.5625	0.717949	0.722222	0.680851	0.638298	0.296296	0.302326	0.588235	0.644444	0.873016	0.538462	0.410714	0.5	0.675676	0.630769	0.72	0.551724	0.575758	0.555556	0.807692	0.772727	0.794118	0.76	0.882353	0.822222	0.911765	0.75	0.727273	0.823529	0.708333
4543783	Island	0.641026	0.431373	0.666667	0.6875	0.756098	0.847826	0.692308	0.745098	0.68	0.666667	0.548387	0.395833	0.553191	0.5	0.777778	0.621622	0.604167	0.275862	0.52	0.755556	0.772727	0.68	0.695652	0.37931	0.525	0.631579	0.78	0.650794	0.516667	0.473684	0.452381	0.58427	0.507692	0.557692	0.466667	0.493151	0.542373	0.666667	0.958333	0.6	0.84	0.875	0.8125	0.942857	0.894737	0.909091	0.882353	0.730769
4543785	Island	0.704545	0.584906	0.571429	0.71875	0.825	0.9375	0.72973	0.903846	0.642857	0.666667	0.571429	0.489796	0.530612	0.593407	0.864407	0.702703	0.612245	0.459016	0.68	0.73913	0.652174	0.694915	0.652174	0.428571	0.416667	0.7	0.843137	0.769231	0.442623	0.479167	0.463415	0.571429	0.462963	0.568627	0.655172	0.573529	0.610169	0.695652	1	0.882353	0.708333	0.875	0.826087	0.972973	0.894737	0.864198	0.5625	0.84
4543787	Island	0.844444	0.8	0.851064	0.764706	0.736842	0.916667	0.833333	0.901961	0.785714	0.826087	0.824561	0.704545	0.56	0.709302	0.803571	0.756757	0.647059	0.448276	0.72	0.826087	0.791667	0.883333	0.822222	0.724138	0.657895	0.842105	0.901961	0.815385	0.618182	0.688889	0.65	0.766234	0.75	0.75	0.851852	0.753846	0.745763	0.9	0.956522	0.911765	0.916667	1	0.913043	0.918919	0.941176	0.945946	1	0.884615
4543789	Island	0.860465	0.755102	0.68	0.78125	0.820513	0.604651	0.714286	0.804348	0.740741	0.642857	0.535714	0.547619	0.454545	0.54878	0.745455	0.588235	0.596154	0.527273	0.615385	0.809524	0.826087	0.824561	0.642857	0.518519	0.540541	0.7	0.836735	0.75	0.5	0.534884	0.575	0.702703	0.462963	0.565217	0.6	0.476923	0.510204	0.666667	0.8	0.694444	0.75	0.785714	0.914894	0.820513	1	0.849315	0.888889	0.73913
4543791	Island	0.866667	0.541667	0.7	0.827586	0.763158	0.767442	0.75	0.697674	0.740741	0.738095	0.5	0.439024	0.488889	0.686047	0.649123	0.527778	0.7	0.545455	0.519231	0.756098	0.681818	0.857143	0.636364	0.576923	0.405405	0.65	0.84	0.80303	0.509091	0.439024	0.585366	0.689189	0.545455	0.638298	0.625	0.52381	0.55102	0.736842	0.95	0.685714	0.8	0.857143	0.869565	0.769231	1	0.767123	0.842105	0.782609
4543793	Island	0.906977	0.787234	0.8	1	0.914286	0.9	0.888889	0.861111	0.793103	1	0.944444	0.837209	1	0.906667	0.92	0.885714	1	0.769231	0.823529	0.97619	0.833333	1	0.979167	0.888889	0.9	0.904762	0.931818	0.878049	0.807018	0.883721	0.891892	0.962963	0.888889	0.86	0.8	0.919355	0.814815	1	0.9375	0.925	1	0.933333	0.933333	0.897436	1	0.959459	1	0.809524
4543795	Island	0.568627	0.488889	0.617021	0.633333	0.388889	0.636364	0.611111	0.806452	0.625	0.613636	0.388889	0.367347	0.282609	0.394366	0.622642	0.333333	0.4	0.291667	0.469388	0.692308	0.583333	0.509804	0.488372	0.444444	0.526316	0.47619	0.625	0.658537	0.321429	0.333333	0.25641	0.4	0.44	0.541667	0.444444	0.366667	0.509804	0.588235	0.833333	0.6	0.761905	0.466667	0.545455	0.634146	0.761905	0.743902	0.421053	0.47619
4543797	Island	0.735849	0.695652	0.913043	0.806452	0.714286	0.607143	0.857143	0.9	0.69697	0.688889	0.518519	0.653061	0.644444	0.605634	0.788462	0.6	0.585366	0.612245	0.519231	0.837838	0.75	0.804348	0.731707	0.592593	0.416667	0.5	0.875	0.865854	0.481481	0.568182	0.463415	0.697674	0.74	0.583333	0.730769	0.542373	0.679245	0.941176	0.833333	0.707317	0.761905	0.866667	0.818182	0.642857	0.904762	0.820513	0.578947	0.857143
4543799	Island	0.722222	0.55102	0.770833	0.806452	0.789474	0.732143	0.857143	0.933333	0.59375	0.829787	0.490196	0.7	0.688889	0.616438	0.777778	0.648649	0.75	0.531915	0.666667	0.722222	0.76	0.723404	0.666667	0.555556	0.405405	0.55	0.851064	0.740741	0.454545	0.545455	0.380952	0.621951	0.571429	0.66	0.791667	0.483871	0.596154	0.764706	0.894737	0.731707	0.809524	0.9375	0.8	0.785714	0.826087	0.807692	0.761905	0.954545
4543801	Island	0.857143	0.847826	0.844444	0.71875	0.871795	0.824561	0.806452	0.869565	0.827586	0.711111	0.617021	0.538462	0.565217	0.728571	0.803922	0.794872	0.842105	0.6	0.734694	0.828571	0.692308	0.733333	0.608696	0.846154	0.540541	0.75	0.8	0.763158	0.716981	0.575	0.55	0.776316	0.847826	0.836735	0.652174	0.6	0.740741	0.8125	0.941176	0.697674	0.944444	0.866667	0.868421	0.902439	0.916667	0.821918	0.888889	1
4543803	Island	0.851064	0.808511	0.956522	0.83871	0.921053	0.851852	0.8	0.869565	0.870968	0.906977	0.555556	0.803922	0.755556	0.779412	0.84	0.685714	0.702703	0.688889	0.714286	0.787879	0.769231	0.818182	0.8	0.76	0.72973	0.55	0.933333	0.930556	0.584906	0.74359	0.627907	0.88	0.826087	0.844444	0.863636	0.559322	0.759259	0.933333	0.941176	0.883721	0.941176	0.866667	0.888889	0.952381	0.84	0.888889	0.5	0.894737
4609477	Open Sea	0.247619	0.126214	0.0315789	0.1875	0.285714	0.4	0.110092	0.488889	0.266667	0.37963	0.576923	0.170732	0.461538	0.344086	0.0884956	0.428571	0.473684	0.311475	0.815385	0.553846	0.418919	0.326923	0.66129	0.576923	0.542373	0.775	0.357143	0.312925	0.383562	0.449275	0.480769	0.684211	0.252525	0.398058	0.265625	0.361111	0.52	0.333333	0.291667	0.240964	0.0416667	0.0888889	0.0952381	0.145631	0.183673	0.00775194	0.242424	0.416667
4609479	Open Sea	0.218182	0.0925926	0.0288462	0.15625	0.263889	0.385542	0.0873016	0.488889	0.225806	0.390909	0.52809	0.0879121	0.386667	0.320388	0.0731707	0.356322	0.453125	0.229508	0.737705	0.536232	0.342466	0.254902	0.606061	0.566667	0.472727	0.771429	0.383838	0.248322	0.375	0.38961	0.473684	0.614815	0.234234	0.369369	0.223881	0.342105	0.443038	0.307692	0.22	0.2125	0.0576923	0.0434783	0.0882353	0.135922	0.145833	0.00775194	0.285714	0.4
4609483	Open Sea	0.324324	0.138889	0.0178571	0.122449	0.285714	0.4	0.0485437	0.546875	0.238095	0.486111	0.587302	0.246154	0.533333	0.345679	0.121622	0.346667	0.444444	0.2	0.791667	0.660377	0.472727	0.361702	0.661017	0.652174	0.53125	0.740741	0.551724	0.365854	0.290909	0.460317	0.659574	0.631148	0.247312	0.358974	0.309091	0.360465	0.542857	0.36	0.294118	0.254545	0.0606061	0.147059	0.0588235	0.227848	0.205882	0.02	0.137931	0.52381
4609487	Open Sea	0.314815	0.156863	0.025	0.105263	0.15625	0.367347	0.0652174	0.488372	0.258065	0.392857	0.54386	0.211538	0.531915	0.3	0.0869565	0.4	0.484848	0.2	0.818182	0.594595	0.5	0.382353	0.62	0.571429	0.52381	0.571429	0.586957	0.408451	0.194444	0.395349	0.483871	0.587629	0.190476	0.272727	0.236842	0.369231	0.604167	0.363636	0.185185	0.209302	0.0434783	0.185185	0.0392157	0.258621	0.347826	0.015625	0.208333	0.461538
4609489	Open Sea	0.392157	0.139535	0.0555556	0.189189	0.129032	0.434783	0.0813953	0.613636	0.233333	0.62	0.6	0.24	0.47619	0.275862	0.186047	0.363636	0.59375	0.255814	0.733333	0.666667	0.457143	0.40625	0.6875	0.666667	0.619048	0.642857	0.571429	0.43662	0.294118	0.511628	0.62069	0.573034	0.213115	0.301887	0.297297	0.344262	0.574468	0.391304	0.16	0.146341	0.0952381	0.307692	0.0851064	0.25	0.409091	0.0677966	0.263158	0.615385
5179223	Open Sea	0.313725	0.858824	0.71875	0.676471	0.387097	0.461538	0.298507	0.372093	0.222222	0.283784	0.235294	0.220588	0.255814	0.515625	0.327869	0.373134	0.310345	0.215385	0.512821	0.392157	0.454545	0.309091	0.339623	0.259259	0.307692	0.392857	0.4	0.253165	0.338983	0.323077	0.209302	0.385542	0.468085	0.411765	0.407407	0.333333	0.294118	0.384615	0.516129	0.657143	0.625	0.75	0.686275	0.703704	0.575	0.771084	0.6	0.684211
5469951	Open Sea	0.242424	0.471154	0.447368	0.368421	0.43662	0.321839	0.321101	0.6125	0.428571	0.316832	0.363636	0.225352	0.444444	0.330189	0.442308	0.258427	0.25974	0.292308	0.506329	0.260417	0.361702	0.470588	0.35	0.245614	0.363636	0.451613	0.541176	0.557143	0.202247	0.163043	0.181818	0.532051	0.146667	0.197674	0.254902	0.228261	0.213333	0.387097	0.744681	0.617978	0.727273	0.694444	0.702381	0.851064	0.773585	0.646018	0.658537	0.758621
6808765	Open Sea	0.444444	0.657143	0.633333	0.6	0.6	0.459459	0.285714	0.5	0.590909	0.425532	0.28	0.4	0.272727	0.463415	0.529412	0.285714	0.241379	0.392857	0.351351	0.375	0.347826	0.258065	0.190476	0.125	0.342857	0.294118	0.459459	0.350649	0.34375	0.5	0.296296	0.350877	0.346939	0.534483	0.642857	0.375	0.277778	0.357143	0.6	0.615385	0.6875	0.65	0.888889	0.694444	0.875	0.74	0.6875	0.6
6987033	Open Sea	0.222222	0.301887	0.444444	0.348837	0.394737	0.37037	0.377049	0.226415	0.321429	0.190476	0.0571429	0.25	0.411765	0.306452	0.202899	0.189655	0.3125	0.181818	0.282609	0.163265	0.261905	0.421053	0.136364	0.363636	0.132075	0.357143	0.282609	0.428571	0.282051	0.163934	0.428571	0.188679	0.346939	0.2	0.2	0.188406	0.263158	0.333333	0.925926	0.529412	0.777778	0.428571	0.516129	0.933333	0.666667	0.774648	0.933333	0.761905
7035989	Island	0.359375	0.508197	0.545455	0.511628	0.378378	0.446429	0.442623	0.613636	0.277778	0.268293	0.363636	0.479167	0.633333	0.37234	0.377778	0.231707	0.243243	0.378049	0.578125	0.245614	0.576923	0.521739	0.178571	0.323529	0.253731	0.315789	0.555556	0.4625	0.245614	0.363636	0.4	0.449153	0.15625	0.615385	0.717949	0.380282	0.6	0.538462	0.84	0.678571	0.666667	0.956522	0.692308	0.655738	0.6	0.878788	0.857143	0.7
7035991	Island	0.230769	0.377049	0.466667	0.27907	0.27027	0.333333	0.283333	0.555556	0.277778	0.180723	0.283784	0.428571	0.435484	0.195652	0.423913	0.243902	0.273973	0.256098	0.384615	0.175439	0.433962	0.340426	0.0701754	0.342857	0.208955	0.238095	0.46875	0.457831	0.220339	0.212121	0.368421	0.305085	0.0952381	0.515152	0.769231	0.357143	0.433962	0.64	0.814815	0.636364	0.703704	0.458333	0.553846	0.619048	0.7	0.820896	0.694444	0.548387
7035993	Island	0.353846	0.419355	0.755102	0.568182	0.342105	0.45614	0.363636	0.688889	0.3	0.348837	0.32	0.44	0.558824	0.354839	0.263158	0.278481	0.328947	0.430233	0.580645	0.105263	0.517857	0.576923	0.15	0.305556	0.2	0.428571	0.553846	0.432099	0.174603	0.323529	0.372881	0.415254	0.0769231	0.557143	0.641026	0.216216	0.436364	0.62963	0.814815	0.722222	0.8	0.72	0.686567	0.646154	0.8	0.957746	0.757576	0.793103
7035995	Island	0.5625	0.516129	0.77551	0.533333	0.315789	0.526316	0.446154	0.695652	0.285714	0.413793	0.310811	0.52	0.695652	0.354167	0.354167	0.285714	0.373333	0.472527	0.606557	0.186441	0.614035	0.528302	0.290323	0.388889	0.285714	0.47619	0.61194	0.578313	0.435484	0.41791	0.40678	0.45	0.228571	0.722222	0.828571	0.56	0.596491	0.518519	0.888889	0.745455	0.870968	1	0.808824	0.737705	0.681818	0.916667	0.90625	0.827586
7035997	Island	0.549296	0.462687	0.76	0.511111	0.378378	0.578947	0.46875	0.608696	0.375	0.404494	0.346154	0.461538	0.661972	0.357895	0.376238	0.364706	0.345679	0.424242	0.551724	0.177419	0.545455	0.518519	0.222222	0.414634	0.295775	0.285714	0.676056	0.577778	0.234375	0.4	0.433333	0.388889	0.208333	0.649351	0.682927	0.552941	0.508197	0.615385	0.9	0.836066	0.882353	0.962963	0.8	0.768116	0.791667	0.986667	0.818182	0.821429
7035999	Island	0.371429	0.308824	0.68	0.444444	0.189189	0.446429	0.28125	0.568182	0.208333	0.271739	0.142857	0.37037	0.506849	0.244898	0.282828	0.117647	0.246753	0.21	0.316667	0.0833333	0.290909	0.320755	0.0958904	0.195122	0.205479	0.333333	0.464789	0.376344	0.227273	0.205479	0.307692	0.24812	0.0684932	0.345679	0.707317	0.443182	0.47619	0.407407	0.8	0.645161	0.764706	0.807692	0.557143	0.583333	0.8	0.815789	0.78125	0.7
7036001	Island	0.4	0.402985	0.773585	0.465116	0.348837	0.545455	0.34375	0.659574	0.25	0.261364	0.271605	0.360656	0.632911	0.27451	0.316832	0.280899	0.289157	0.346939	0.459016	0.151515	0.438596	0.472727	0.155844	0.230769	0.25974	0.347826	0.581081	0.521739	0.242857	0.282051	0.382353	0.331034	0.17284	0.44186	0.636364	0.397849	0.507937	0.464286	0.709677	0.813559	0.78125	0.956522	0.671429	0.75	0.75	0.880952	0.852941	0.724138
7036003	Island	0.371429	0.380282	0.690909	0.521739	0.318182	0.491228	0.2	0.55102	0.269231	0.184783	0.261905	0.34375	0.569767	0.208696	0.284314	0.212766	0.266667	0.254717	0.33871	0.128571	0.306452	0.446429	0.142857	0.236842	0.146341	0.333333	0.426829	0.45098	0.150685	0.157895	0.353846	0.286624	0.0864198	0.435294	0.673469	0.247423	0.514286	0.413793	0.757576	0.741379	0.717949	0.88	0.611111	0.714286	0.666667	0.880952	0.789474	0.8
7036005	Island	0.357143	0.355263	0.383333	0.489362	0.326087	0.517857	0.298507	0.576923	0.296296	0.195876	0.277778	0.461538	0.5	0.333333	0.254902	0.142857	0.288889	0.225225	0.366667	0.132353	0.383333	0.311475	0.127907	0.238095	0.170732	0.304348	0.404762	0.463636	0.133333	0.246753	0.313433	0.217949	0.192771	0.453488	0.693878	0.21	0.492537	0.448276	0.771429	0.677419	0.666667	0.851852	0.623188	0.741573	0.730769	0.738095	0.794872	0.766667
7036007	Island	0.166667	0.345238	0.360656	0.392157	0.276596	0.433333	0.202703	0.518519	0.275862	0.176471	0.157895	0.289474	0.41573	0.19469	0.138614	0.13	0.23913	0.234783	0.177419	0.0933333	0.227273	0.3	0.0434783	0.106383	0.0930233	0.275862	0.241758	0.264957	0.120482	0.226667	0.238806	0.163522	0.0888889	0.404494	0.6	0.18018	0.432836	0.322581	0.575	0.640625	0.692308	0.733333	0.48	0.641304	0.666667	0.733333	0.659091	0.612903
7036009	Island	0.179487	0.357895	0.479452	0.157895	0.303571	0.352113	0.318182	0.482759	0.242424	0.213592	0.252427	0.380952	0.436782	0.243697	0.256881	0.113821	0.205882	0.24031	0.25	0.267442	0.246753	0.202703	0.0729167	0.195652	0.105882	0.40625	0.27551	0.274809	0.0967742	0.325	0.304348	0.244318	0.13	0.397959	0.64	0.193548	0.453125	0.2	0.642857	0.521739	0.69697	0.764706	0.418919	0.69	0.75	0.62963	0.642857	0.862069
7036011	Island	0.227848	0.42268	0.5	0.40678	0.4	0.459459	0.272727	0.536232	0.307692	0.194915	0.358974	0.414634	0.532609	0.290076	0.225	0.195312	0.25	0.311111	0.37037	0.206186	0.385542	0.317073	0.222222	0.313725	0.214286	0.351351	0.45098	0.384058	0.27551	0.298851	0.333333	0.302703	0.247706	0.524272	0.854167	0.414815	0.513889	0.351351	0.857143	0.703704	0.857143	0.947368	0.623529	0.666667	0.684211	0.773913	0.784314	0.862069
7036013	Island	0.170455	0.252427	0.3125	0.229508	0.370968	0.430233	0.291262	0.450704	0.15	0.169231	0.177419	0.242105	0.383838	0.183824	0.174603	0.110236	0.158333	0.181159	0.23913	0.121495	0.357143	0.27381	0.157407	0.176471	0.11236	0.307692	0.277778	0.183099	0.0666667	0.191919	0.233333	0.185185	0.0973451	0.415929	0.693878	0.205882	0.384615	0.175	0.642857	0.505747	0.714286	0.864865	0.447059	0.622642	0.692308	0.592	0.692308	0.833333
7036015	Island	0.213483	0.409091	0.487179	0.220588	0.369231	0.451613	0.373832	0.487179	0.325	0.161765	0.244444	0.393939	0.479592	0.289855	0.157025	0.140625	0.163793	0.275362	0.391304	0.168067	0.386364	0.178571	0.176991	0.192308	0.136364	0.27907	0.297297	0.295775	0.157895	0.223301	0.21978	0.329949	0.181034	0.421488	0.74	0.328571	0.4	0.181818	0.755556	0.574713	0.765957	0.789474	0.471264	0.706422	0.636364	0.644928	0.826923	0.833333
7036017	Island	0.17757	0.325758	0.395604	0.222222	0.296296	0.485714	0.40625	0.431818	0.196078	0.109677	0.144737	0.351351	0.556701	0.238095	0.172662	0.0939597	0.134328	0.254902	0.350515	0.157143	0.25	0.22449	0.115702	0.155172	0.19	0.276596	0.322581	0.3	0.193548	0.151261	0.21	0.234742	0.10687	0.51773	0.672727	0.237179	0.391304	0.173913	0.722222	0.617021	0.617021	0.869565	0.445652	0.710938	0.616667	0.630872	0.788462	0.75
7036019	Island	0.152542	0.25	0.19469	0.28	0.288889	0.366972	0.325758	0.375	0.181818	0.0843373	0.0875	0.290076	0.378378	0.178161	0.112583	0.0636943	0.0820896	0.130137	0.25	0.133333	0.252427	0.212963	0.0629921	0.196721	0.16	0.215686	0.282609	0.236111	0.0731707	0.153285	0.141509	0.137931	0.0735294	0.381295	0.40678	0.263158	0.28972	0.0566038	0.763636	0.519608	0.5	0.75	0.354167	0.7	0.671875	0.541667	0.714286	0.736842
7036021	Island	0.139073	0.124324	0.19697	0.119658	0.17757	0.255814	0.202703	0.338983	0.121622	0.0654206	0.0451977	0.174194	0.276119	0.0878049	0.0804598	0.0335196	0.034965	0.0971429	0.116279	0.0595238	0.0787402	0.135338	0.0144928	0.0540541	0.0571429	0.166667	0.143836	0.156	0.030303	0.0473373	0.0873016	0.045977	0.0512821	0.327586	0.396825	0.102941	0.135593	0.0597015	0.482759	0.322314	0.430769	0.618182	0.252336	0.492754	0.565789	0.441489	0.691176	0.375
7036023	Island	0.0967742	0.109948	0.175573	0.0333333	0.196429	0.140625	0.228188	0.282051	0.0921053	0.055814	0.027933	0.193548	0.257576	0.0904762	0.0621469	0.043956	0.0482759	0.0804598	0.110236	0.0689655	0.131783	0.0902256	0.028777	0.0533333	0.0471698	0.1	0.122449	0.146825	0.0588235	0.0526316	0.0866142	0.0393701	0.0576923	0.210227	0.222222	0.0825243	0.133333	0.0606061	0.491525	0.373984	0.318182	0.350877	0.198198	0.258993	0.402597	0.356021	0.5	0.390244
7036025	Island	0.143713	0.169312	0.360902	0.15873	0.175439	0.322835	0.174194	0.423077	0.1375	0.0681818	0.052356	0.191083	0.514286	0.154185	0.108247	0.0628571	0.0933333	0.134503	0.179104	0.0883978	0.114286	0.138889	0.0266667	0.0405405	0.105263	0.328358	0.14966	0.179487	0.128571	0.102273	0.154412	0.0769231	0.03125	0.365079	0.405797	0.236364	0.222222	0.0967742	0.507937	0.403226	0.539474	0.733333	0.403509	0.7125	0.55	0.581731	0.703125	0.5
7036027	Island	0.174419	0.265306	0.181159	0.102941	0.235849	0.372414	0.147436	0.385185	0.0978261	0.0785124	0.0820513	0.172222	0.391304	0.138211	0.0873786	0.0388889	0.0372671	0.127072	0.141892	0.0782123	0.136054	0.15493	0.0240964	0.040404	0.117188	0.197368	0.155844	0.222591	0.0902778	0.0989011	0.101911	0.0974026	0.0509554	0.291866	0.375	0.178261	0.260563	0.166667	0.569231	0.391667	0.486842	0.790323	0.385965	0.557471	0.518519	0.585859	0.637681	0.45283
7036029	Island	0.292398	0.497382	0.481481	0.218978	0.366071	0.4375	0.2875	0.415385	0.260417	0.177866	0.178218	0.247368	0.401235	0.233607	0.129808	0.101695	0.11465	0.163743	0.315436	0.20904	0.265306	0.251613	0.103448	0.239583	0.15748	0.269231	0.28	0.369281	0.157143	0.215116	0.123457	0.207006	0.10828	0.405263	0.458824	0.178723	0.377622	0.225806	0.707692	0.457627	0.567901	0.825397	0.390625	0.655738	0.594937	0.601064	0.676056	0.690909
7036031	Island	0.248555	0.335079	0.447761	0.123188	0.297297	0.302817	0.216561	0.333333	0.170213	0.103448	0.119171	0.183673	0.360759	0.164557	0.0841584	0.0643275	0.0743243	0.140351	0.2	0.119048	0.236111	0.153333	0.0882353	0.135417	0.115385	0.219512	0.24	0.274576	0.0833333	0.145349	0.0843373	0.171429	0.103659	0.300546	0.481928	0.130435	0.27972	0.147541	0.558824	0.426357	0.4625	0.727273	0.322581	0.589888	0.471429	0.641304	0.728571	0.516667
7036033	Island	0.143678	0.206522	0.372263	0.0652174	0.207207	0.291667	0.140127	0.360902	0.0967742	0.0615385	0.103627	0.125	0.25625	0.126582	0.0909091	0.0414201	0.0608108	0.0958084	0.184211	0.0598802	0.179856	0.147436	0.0662651	0.1	0.107692	0.168675	0.275168	0.240418	0.0482759	0.122807	0.0538922	0.0679612	0.0606061	0.244565	0.325	0.12069	0.228188	0.163934	0.632353	0.356589	0.45	0.606061	0.227642	0.380682	0.454545	0.518519	0.528571	0.440678
7036035	Island	0.152047	0.2	0.36	0.128571	0.256198	0.286667	0.212903	0.320611	0.150538	0.0839695	0.08	0.229947	0.319018	0.192	0.0703518	0.0920245	0.038961	0.0960452	0.214765	0.105263	0.123188	0.168831	0.0632184	0.173077	0.0503597	0.280488	0.210526	0.221429	0.0733333	0.125714	0.136905	0.211726	0.0639535	0.276382	0.298701	0.101266	0.219178	0.1	0.583333	0.350746	0.433735	0.602941	0.358779	0.440678	0.373333	0.650794	0.730159	0.516667
7036037	Island	0.14881	0.287293	0.429752	0.1	0.285714	0.355263	0.191083	0.374046	0.134831	0.0583658	0.0588235	0.194737	0.390244	0.200787	0.108374	0.0306748	0.0774194	0.127907	0.227273	0.0765027	0.175182	0.14375	0.0574713	0.114286	0.122302	0.292683	0.218543	0.238596	0.0331126	0.0949721	0.121212	0.159609	0.0465116	0.30303	0.342105	0.145299	0.277419	0.222222	0.621622	0.366412	0.333333	0.58209	0.343511	0.522222	0.461538	0.642857	0.790323	0.53125
7036039	Island	0.181818	0.20765	0.395161	0.0680272	0.254098	0.320261	0.269231	0.363636	0.107143	0.0902256	0.0656566	0.230366	0.345912	0.164062	0.08867	0.0314465	0.0440252	0.0823529	0.170886	0.0378378	0.124088	0.148387	0.0282486	0.114286	0.0472973	0.271605	0.191083	0.226481	0.0337838	0.0809249	0.0892857	0.0996885	0.0930233	0.338384	0.315068	0.0982906	0.233766	0.109375	0.671233	0.311111	0.4125	0.521739	0.323308	0.517241	0.481481	0.572917	0.731343	0.5
7036041	Island	0.191617	0.346591	0.38843	0.12766	0.300813	0.254902	0.283019	0.328358	0.149425	0.135849	0.0742574	0.255208	0.384146	0.179283	0.0990099	0.0641026	0.0613497	0.130952	0.217391	0.139896	0.0928571	0.210191	0.0742857	0.140187	0.121622	0.258824	0.24359	0.231293	0.0794702	0.156977	0.125	0.180982	0.115607	0.338462	0.480519	0.136752	0.26875	0.196721	0.675676	0.342857	0.488095	0.685714	0.485507	0.591954	0.535714	0.624339	0.80303	0.575758
7036043	Island	0.0892857	0.195402	0.228814	0.0340136	0.192	0.236842	0.229814	0.348837	0.104651	0.0666667	0.0606061	0.136842	0.236686	0.0980392	0.0456853	0.0254777	0.0179641	0.0818713	0.0961538	0.0459184	0.141791	0.183007	0.0282486	0.0792079	0.0392157	0.172414	0.168605	0.187291	0.0258065	0.0769231	0.0681818	0.0660661	0.0508475	0.172414	0.270588	0.044843	0.159236	0.1	0.567568	0.239437	0.395349	0.541667	0.209459	0.443182	0.369048	0.42487	0.707692	0.348485
7036045	Island	0.157233	0.300578	0.308333	0.0791367	0.25641	0.305195	0.280488	0.419355	0.223529	0.110236	0.0821256	0.241026	0.48	0.142292	0.0927835	0.0653595	0.0714286	0.119048	0.189873	0.0842105	0.269841	0.214286	0.0632184	0.161616	0.135484	0.227848	0.215116	0.236111	0.0466667	0.122222	0.140449	0.153153	0.0874317	0.338384	0.426829	0.104545	0.25	0.147541	0.688312	0.368056	0.493827	0.782609	0.328767	0.570652	0.569767	0.6	0.8125	0.676471
7036047	Island	0.2	0.223958	0.162162	0.0787402	0.166667	0.197279	0.275	0.362832	0.169492	0.104839	0.0952381	0.152941	0.320988	0.0818966	0.075	0.0733333	0.0282486	0.0645161	0.165644	0.0341463	0.179487	0.159236	0.0538922	0.0555556	0.0428571	0.324675	0.125714	0.17551	0.0516129	0.0925926	0.0866667	0.0737179	0.0989011	0.197115	0.25	0.0679612	0.149351	0.0909091	0.542857	0.233333	0.25	0.547945	0.362319	0.459627	0.425	0.420765	0.666667	0.412698
7036049	Island	0.133333	0.198864	0.391304	0.105691	0.172414	0.134228	0.226415	0.40708	0.178571	0.0833333	0.109091	0.217949	0.272152	0.130252	0.0904762	0.0604027	0.0289017	0.0759494	0.17284	0.0621762	0.142857	0.146853	0.0628931	0.114943	0.120301	0.27027	0.107345	0.185654	0.0596026	0.10559	0.151316	0.0746753	0.0497238	0.236181	0.282051	0.130208	0.166667	0.123077	0.560606	0.258741	0.285714	0.492537	0.272727	0.583333	0.518072	0.482955	0.622642	0.465517
7036051	Island	0.184	0.224138	0.292453	0.105691	0.279661	0.262069	0.266234	0.37963	0.185185	0.0843882	0.0792683	0.295302	0.398693	0.137339	0.0980392	0.0694444	0.105882	0.129032	0.231788	0.145161	0.2	0.235294	0.134969	0.241379	0.137405	0.479452	0.17341	0.226891	0.0733333	0.189873	0.193333	0.20202	0.0824176	0.335052	0.383562	0.120879	0.205479	0.215385	0.666667	0.413043	0.442857	0.724138	0.484375	0.601307	0.666667	0.694444	0.679245	0.519231
7036053	Island	0.171875	0.410714	0.460784	0.2	0.221154	0.333333	0.318182	0.377358	0.27451	0.0950413	0.134615	0.360544	0.411765	0.156951	0.134328	0.104895	0.135294	0.167785	0.224638	0.106145	0.227723	0.261194	0.139394	0.225	0.0854701	0.442857	0.205882	0.225532	0.167785	0.235294	0.222222	0.150685	0.150289	0.335135	0.384615	0.155556	0.285714	0.166667	0.621212	0.459854	0.538462	0.758065	0.516393	0.57047	0.648352	0.661202	0.763636	0.685185
7036055	Island	0.301587	0.475904	0.646465	0.184	0.346154	0.469697	0.313725	0.433962	0.313725	0.193277	0.176829	0.351724	0.490446	0.24878	0.181373	0.138158	0.136095	0.210884	0.407143	0.238636	0.316832	0.313433	0.15528	0.2	0.241667	0.514286	0.302326	0.276596	0.254902	0.36478	0.307692	0.250859	0.226744	0.456989	0.476923	0.252747	0.335766	0.179104	0.712121	0.521127	0.553846	0.741379	0.563025	0.836735	0.696629	0.764045	0.614035	0.631579
7036057	Island	0.193548	0.35	0.42	0.128	0.306931	0.321168	0.202703	0.441441	0.22	0.1875	0.152439	0.298611	0.422819	0.180488	0.146465	0.125874	0.170732	0.208333	0.26087	0.150602	0.252427	0.238095	0.0880503	0.210526	0.114035	0.492754	0.248521	0.181416	0.0945946	0.221519	0.188406	0.190813	0.193939	0.288043	0.296875	0.182857	0.251908	0.227273	0.571429	0.466667	0.507937	0.678571	0.482456	0.534247	0.54023	0.614943	0.563636	0.592593
7036059	Island	0.254386	0.288591	0.388889	0.260163	0.357143	0.288889	0.331034	0.42	0.27451	0.159292	0.129412	0.338346	0.454545	0.202073	0.137363	0.125828	0.132075	0.186047	0.407692	0.176056	0.315217	0.258065	0.179487	0.287671	0.164948	0.470588	0.229412	0.275362	0.19708	0.25	0.220339	0.247191	0.0945946	0.5	0.484375	0.169492	0.294118	0.263158	0.742424	0.496063	0.571429	0.777778	0.572727	0.59854	0.666667	0.836364	0.82	0.596154
7036061	Island	0.307692	0.25	0.611765	0.25	0.395604	0.412214	0.323741	0.526316	0.27451	0.208145	0.125	0.372093	0.592308	0.22449	0.124294	0.123288	0.1875	0.18254	0.395349	0.113475	0.355556	0.291667	0.114094	0.242857	0.16129	0.523077	0.253165	0.242268	0.0746269	0.2	0.322034	0.247104	0.113475	0.447674	0.5625	0.205714	0.279661	0.293103	0.734375	0.47541	0.633333	0.679245	0.59	0.609023	0.626667	0.792453	0.75	0.64
7036063	Island	0.275862	0.330827	0.697674	0.103175	0.193182	0.272	0.360902	0.4	0.354167	0.208889	0.15625	0.226891	0.528	0.145946	0.223602	0.0544218	0.121795	0.18254	0.283465	0.151515	0.255556	0.243478	0.0884354	0.25	0.0416667	0.508197	0.205479	0.221053	0.165354	0.196721	0.219298	0.222222	0.153285	0.497006	0.362069	0.222857	0.291667	0.298246	0.727273	0.333333	0.42	0.588235	0.438776	0.532787	0.4625	0.622642	0.566038	0.458333
7036065	Island	0.017094	0	0	0.0403226	0.183908	0	0	0.222222	0	0	0.0714286	0.191667	0.178862	0.0893855	0.0628931	0.0137931	0.0649351	0.0327869	0	0	0.0434783	0	0.00684931	0	0	0.163934	0.112676	0.151351	0.015748	0.0165289	0.0884956	0	0.0518519	0.0123457	0	0	0	0	0.15625	0	0.235294	0.156863	0.181818	0	0	0	0	0
7036067	Island	0.327103	0.294574	0.287356	0.104839	0.313953	0.379032	0.330709	0.54023	0.318182	0.248826	0.161972	0.373913	0.554622	0.163743	0.191083	0.1	0.176871	0.184211	0.364407	0.160305	0.202381	0.36036	0.169118	0.231884	0.076087	0.442623	0.240876	0.247253	0.231405	0.245614	0.163462	0.255411	0.106061	0.5	0.345455	0.235294	0.350427	0.178571	0.716667	0.438017	0.688889	0.777778	0.505495	0.824561	0.625	0.813793	0.76	0.777778
7036069	Island	0.523364	0.351562	0.650602	0.322034	0.45122	0.488189	0.408	0.702381	0.454545	0.481132	0.278571	0.426087	0.728814	0.296296	0.326389	0.207692	0.255034	0.315315	0.451327	0.272727	0.409091	0.513514	0.306569	0.307692	0.244186	0.507937	0.469697	0.41573	0.272727	0.455357	0.371429	0.424107	0.28	0.605263	0.72549	0.280255	0.431034	0.375	0.770492	0.504348	0.577778	0.761905	0.715909	0.728972	0.802632	0.904412	0.93617	0.860465
7036071	Island	0.261682	0.387097	0.630952	0.123894	0.289157	0.302326	0.238095	0.4125	0.238095	0.119048	0.171429	0.333333	0.478261	0.149068	0.195804	0.102941	0.118881	0.160377	0.302752	0.108333	0.230769	0.314286	0.102941	0.140625	0.0804598	0.46875	0.167939	0.201117	0.08	0.263636	0.17	0.220183	0.0873016	0.342466	0.276596	0.141026	0.27193	0.254545	0.698413	0.356522	0.489362	0.731707	0.433333	0.631068	0.644737	0.614815	0.75	0.604651
7036073	Island	0.398148	0.305785	0.705882	0.280702	0.329268	0.496063	0.304688	0.623377	0.315789	0.213198	0.234043	0.288288	0.5	0.188312	0.207143	0.161972	0.179856	0.145631	0.317757	0.191304	0.329545	0.326923	0.15748	0.2	0.0731707	0.52381	0.284615	0.291892	0.122951	0.247525	0.207921	0.242718	0.11811	0.476821	0.375	0.233766	0.301887	0.28	0.761905	0.469027	0.574468	0.897436	0.478261	0.533981	0.513158	0.706767	0.854167	0.714286
7036075	Island	0.261682	0.302752	0.586207	0.229358	0.3	0.456	0.278689	0.459459	0.289474	0.134328	0.158273	0.287037	0.411215	0.187919	0.227586	0.112676	0.180451	0.14	0.254902	0.207207	0.247059	0.228571	0.134921	0.258065	0.146341	0.507937	0.220472	0.2	0.231405	0.222222	0.226804	0.245098	0.097561	0.5	0.395833	0.2	0.261682	0.163265	0.806452	0.527273	0.6	0.888889	0.576087	0.548077	0.594595	0.518519	0.8125	0.5
7036077	Island	0.474747	0.33945	0.463768	0.233333	0.409836	0.517544	0.32	0.58209	0.317073	0.281437	0.188406	0.442105	0.457447	0.285714	0.208	0.179104	0.247619	0.181818	0.322917	0.0967742	0.397059	0.446809	0.22	0.292308	0.235294	0.603774	0.319149	0.417722	0.322581	0.232558	0.329114	0.298137	0.137255	0.401709	0.574468	0.258333	0.467391	0.326087	0.875	0.425743	0.631579	0.6875	0.625	0.487805	0.5	0.617188	0.714286	0.604651
7036079	Island	0.40625	0.365385	0.343284	0.244186	0.409836	0.296296	0.234043	0.38806	0.282051	0.172619	0.222222	0.389474	0.351064	0.221239	0.180328	0.123077	0.257143	0.168675	0.290323	0.177778	0.253731	0.354839	0.195876	0.138462	0.1875	0.528302	0.244681	0.305732	0.2	0.170732	0.285714	0.150943	0.141414	0.422414	0.361702	0.381356	0.377778	0.288889	0.6875	0.392157	0.578947	0.666667	0.518519	0.358025	0.471429	0.464567	0.653061	0.465116
7036081	Island	0.489583	0.425743	0.709677	0.240506	0.473684	0.460784	0.311111	0.629032	0.473684	0.358974	0.217054	0.373626	0.545455	0.236364	0.252174	0.147287	0.306122	0.3375	0.483146	0.222222	0.553846	0.470588	0.252747	0.467742	0.213115	0.66	0.402174	0.414966	0.304348	0.292683	0.415584	0.460526	0.11236	0.551724	0.571429	0.258929	0.470588	0.454545	0.864407	0.574468	0.771429	0.806452	0.734177	0.653846	0.69697	0.723577	0.9	0.780488
7036083	Island	0.714286	0.607143	0.944444	0.4	0.477273	0.597826	0.352941	0.66	0.588235	0.416667	0.333333	0.724638	0.666667	0.47191	0.359551	0.194444	0.337349	0.492063	0.444444	0.214286	0.679245	0.507246	0.373134	0.607843	0.306122	0.65	0.458333	0.570175	0.378788	0.362069	0.539683	0.629921	0.352941	0.701031	0.645161	0.494382	0.59375	0.457143	0.782609	0.652778	0.888889	0.833333	0.588235	0.657143	0.890909	0.858586	0.95122	0.941176
7036085	Island	0.626667	0.52439	0.884615	0.407407	0.404762	0.593407	0.292308	0.6875	0.606061	0.392857	0.295455	0.691176	0.649123	0.402299	0.348837	0.205882	0.303797	0.448276	0.413333	0.197183	0.627451	0.58209	0.323077	0.5625	0.255319	0.615385	0.478261	0.563636	0.403226	0.269231	0.507937	0.521008	0.369231	0.714286	0.551724	0.372093	0.491803	0.294118	0.840909	0.585714	0.777778	0.869565	0.65625	0.830769	0.814815	0.683673	0.825	0.735294
7036087	Island	0.56338	0.594595	0.755556	0.44898	0.444444	0.632184	0.3	0.789474	0.571429	0.381443	0.272727	0.661017	0.653846	0.318841	0.443038	0.185567	0.30137	0.54717	0.4	0.318841	0.590909	0.423729	0.372881	0.416667	0.488372	0.685714	0.639344	0.693069	0.509804	0.361702	0.54717	0.552381	0.388889	0.695122	0.655172	0.423077	0.532258	0.354839	0.857143	0.596774	0.72	0.772727	0.622642	0.677966	0.897959	0.825	0.833333	0.758621
7036089	Island	0.692308	0.551724	0.903226	0.428571	0.625	0.618182	0.542857	0.807692	0.647059	0.491803	0.333333	0.567568	0.75	0.533333	0.45283	0.378788	0.483871	0.542857	0.651163	0.571429	0.689655	0.644444	0.538462	0.714286	0.375	0.909091	0.861111	0.61194	0.575758	0.564103	0.5	0.710145	0.571429	0.538462	0.705882	0.512195	0.789474	0.6	1	0.761905	0.866667	0.866667	0.717949	0.837209	0.896552	0.8	0.913043	1
7036091	Island	0.366667	0.428571	0.52381	0.208333	0.4	0.395349	0.423077	0.55	0.411765	0.387755	0.119048	0.322581	0.615385	0.53125	0.177778	0.163636	0.142857	0.15625	0.461538	0.2	0.4	0.428571	0.205882	0.388889	0.222222	0.631579	0.433333	0.413043	0.259259	0.242424	0.259259	0.568966	0.222222	0.390244	0.571429	0.428571	0.310345	0.5625	0.947368	0.65625	0.4	0.75	0.62069	0.870968	0.944444	0.842105	0.9375	0.823529
8103855	Open Sea	0.894737	0.609756	0.782609	0.909091	0.590909	0.864865	0.413793	0.45	0.818182	0.34375	0.404762	0.27027	0.652174	0.5	0.142857	0.142857	0.34375	0.606061	0.5	0.384615	0.172414	0.392857	0.7	0.115385	0.133333	0.6	0.37037	0.45098	0.2	0.333333	0.46875	0.175	0.166667	0.230769	0.142857	0.72973	0.333333	0.545455	0.466667	0.4	0.5625	0.266667	0.428571	0.552632	0.866667	0.363636	0.733333	0.5
8103857	Open Sea	0.722222	0.175	0.826087	0.727273	0.608696	0.744186	0.4	0.466667	0.818182	0.324324	0.444444	0.368421	0.419355	0.456522	0.0925926	0.105263	0.342857	0.470588	0.431818	0.297872	0.147059	0.5	0.583333	0.151515	0.172414	0.529412	0.357143	0.272727	0.09375	0.211538	0.307692	0.155556	0.277778	0.166667	0.1875	0.545455	0.25	0.357143	0.470588	0.518519	0.380952	0.3125	0.392857	0.613636	0.705882	0.326531	0.615385	0.181818
8547289	Island	0.425532	0.509091	0.317073	0.558824	0.488372	0.594595	0.413043	0.742857	0.666667	0.352941	0.216216	0.206897	0.163265	0.295082	0.141176	0.112676	0.202703	0.274194	0.26	0.22449	0.375	0.171875	0.275	0.291667	0.106383	0.208333	0.422222	0.253521	0.236364	0.265306	0.16	0.0973451	0.3	0.267857	0.333333	0.471698	0.244444	0.411765	0.823529	0.166667	0.428571	0.62963	0.538462	0.363636	0.481481	0.571429	0.565217	0.2
8547291	Island	0.434783	0.509091	0.27907	0.6	0.522727	0.589744	0.354167	0.735294	0.666667	0.275362	0.189189	0.125	0.183673	0.283333	0.157303	0.140845	0.194805	0.285714	0.163265	0.208333	0.26087	0.177419	0.238095	0.285714	0.14	0.346154	0.367347	0.257143	0.210526	0.234043	0.2	0.107143	0.254902	0.25	0.291667	0.446429	0.195652	0.277778	0.8	0.163265	0.363636	0.481481	0.45098	0.333333	0.269231	0.492754	0.5	0.166667
8547293	Island	0.375	0.37931	0.244444	0.575	0.560976	0.585366	0.416667	0.741935	0.8125	0.275362	0.184211	0.15625	0.16	0.292308	0.130435	0.138889	0.24	0.230769	0.285714	0.191489	0.25	0.116667	0.276596	0.291667	0.145833	0.391304	0.320755	0.226667	0.152542	0.255814	0.214286	0.119658	0.230769	0.283333	0.333333	0.472727	0.219512	0.1875	0.666667	0.211538	0.157895	0.576923	0.438596	0.321429	0.444444	0.5	0.583333	0.230769
8547295	Island	0.488889	0.47541	0.434783	0.487179	0.513514	0.636364	0.377358	0.675676	0.692308	0.364865	0.171429	0.203125	0.254545	0.344262	0.150538	0.135135	0.213333	0.301587	0.265306	0.16	0.409091	0.233333	0.3	0.259259	0.175439	0.318182	0.309091	0.189873	0.186441	0.3	0.25	0.110169	0.272727	0.309859	0.342857	0.408163	0.268293	0.133333	0.588235	0.229167	0.263158	0.464286	0.4	0.366667	0.653846	0.52381	0.681818	0.307692
8547297	Island	0.568182	0.57377	0.478261	0.538462	0.567568	0.666667	0.358491	0.684211	0.461538	0.350649	0.2	0.212121	0.240741	0.387097	0.141304	0.164384	0.217949	0.354839	0.354167	0.24	0.409091	0.233333	0.32	0.384615	0.109091	0.347826	0.321429	0.253165	0.155172	0.34	0.245614	0.101695	0.310345	0.257576	0.352941	0.372549	0.261905	0.133333	0.588235	0.2	0.263158	0.5	0.416667	0.370968	0.592593	0.541176	0.636364	0.307692
8547299	Island	0.477273	0.5	0.461538	0.487805	0.527778	0.625	0.309091	0.756098	0.705882	0.346154	0.324324	0.233333	0.215686	0.358209	0.170213	0.189189	0.244186	0.315789	0.32	0.22	0.347826	0.303571	0.333333	0.307692	0.222222	0.423077	0.351852	0.261905	0.160714	0.294118	0.280702	0.13913	0.4375	0.304348	0.3125	0.416667	0.326087	0.166667	0.65	0.1875	0.363636	0.44	0.357143	0.380952	0.5	0.463415	0.68	0.375
8547301	Island	0.386364	0.577465	0.448276	0.595745	0.393939	0.734694	0.267857	0.78	0.727273	0.352941	0.311111	0.180328	0.211538	0.318841	0.170213	0.140845	0.182927	0.271186	0.25	0.212766	0.37037	0.377358	0.42	0.285714	0.152542	0.434783	0.333333	0.285714	0.148148	0.288462	0.295082	0.177966	0.411765	0.260274	0.352941	0.474576	0.333333	0.136364	0.608696	0.2	0.36	0.466667	0.318841	0.349206	0.714286	0.465909	0.592593	0.35
8547303	Island	0.477273	0.635135	0.413793	0.673469	0.59375	0.708333	0.275862	0.734694	0.863636	0.317647	0.282609	0.216667	0.235294	0.367647	0.184783	0.164179	0.2	0.315789	0.333333	0.26	0.346154	0.339623	0.38	0.344828	0.157895	0.454545	0.410714	0.284091	0.115385	0.333333	0.316667	0.184874	0.403846	0.319444	0.382353	0.464286	0.363636	0.227273	0.6	0.229167	0.36	0.607143	0.371429	0.42623	0.730769	0.5	0.615385	0.315789
8547305	Island	0.512195	0.637681	0.482143	0.595745	0.733333	0.714286	0.233333	0.833333	0.666667	0.333333	0.358974	0.278689	0.222222	0.428571	0.218391	0.169231	0.207792	0.296296	0.380952	0.255319	0.423077	0.346154	0.425532	0.333333	0.215686	0.454545	0.339623	0.27907	0.1	0.38	0.321429	0.198113	0.465116	0.328358	0.388889	0.396226	0.333333	0.227273	0.565217	0.264151	0.391304	0.655172	0.393939	0.491228	0.636364	0.512195	0.6	0.35
8547307	Island	0.388889	0.622951	0.436364	0.567568	0.636364	0.72093	0.203704	0.76087	0.75	0.337838	0.354839	0.264151	0.297297	0.433333	0.236111	0.155172	0.150685	0.255319	0.171429	0.227273	0.428571	0.348837	0.387755	0.25	0.195652	0.210526	0.26	0.307692	0.2	0.3	0.32	0.1875	0.452381	0.3	0.371429	0.444444	0.315789	0.263158	0.652174	0.244444	0.391304	0.72	0.392857	0.530612	0.714286	0.532468	0.583333	0.181818
8547309	Island	0.285714	0.5	0.333333	0.567568	0.428571	0.615385	0.153846	0.682927	0.526316	0.287671	0.366667	0.18	0.272727	0.392857	0.114286	0.140351	0.15493	0.25	0.30303	0.219512	0.409091	0.244444	0.272727	0.259259	0.1875	0.421053	0.204082	0.181818	0.162162	0.15	0.282609	0.189474	0.459459	0.166667	0.25	0.320755	0.179487	0.277778	0.590909	0.214286	0.391304	0.590909	0.357143	0.422222	0.625	0.459459	0.545455	0.2
8547311	Island	0.3125	0.42	0.245283	0.444444	0.421053	0.470588	0.0625	0.638889	0.555556	0.235294	0.21875	0.170213	0.16129	0.315789	0.193548	0.0196078	0.123077	0.214286	0.2	0.179487	0.272727	0.2	0.175	0.16	0.0697674	0.294118	0.192308	0.180556	0.114286	0.243243	0.139535	0.130435	0.352941	0.140351	0.166667	0.2	0.205128	0.1875	0.555556	0.314286	0.409091	0.421053	0.333333	0.404762	0.6	0.42029	0.35	0.222222
8547313	Island	0.419355	0.612245	0.34	0.611111	0.684211	0.575758	0.183673	0.75	0.8	0.313433	0.34375	0.244444	0.354839	0.428571	0.190476	0.08	0.125	0.309524	0.285714	0.157895	0.35	0.318182	0.358974	0.173913	0.255814	0.375	0.269231	0.232877	0.181818	0.27027	0.302326	0.195652	0.342857	0.254545	0.291667	0.3	0.263158	0.25	0.555556	0.314286	0.409091	0.631579	0.351852	0.547619	0.5	0.567164	0.55	0.263158
8547315	Island	0.40625	0.6875	0.434783	0.677419	0.611111	0.566667	0.204082	0.794118	0.785714	0.360656	0.354839	0.277778	0.222222	0.446429	0.209677	0.125	0.111111	0.275	0.3125	0.216216	0.3	0.365854	0.428571	0.190476	0.157895	0.142857	0.347826	0.26087	0.225806	0.282051	0.285714	0.263736	0.375	0.259259	0.375	0.34	0.25	0.266667	0.647059	0.30303	0.47619	0.7	0.377358	0.5	0.6	0.589286	0.526316	0.235294
8547317	Island	0.419355	0.547619	0.380952	0.655172	0.555556	0.703704	0.155556	0.787879	0.75	0.315789	0.354839	0.28125	0.285714	0.44	0.203704	0.148936	0.101695	0.257143	0.344828	0.2	0.4	0.282051	0.451613	0.166667	0.15	0.285714	0.386364	0.268657	0.241379	0.315789	0.358974	0.25	0.448276	0.255319	0.363636	0.361702	0.25641	0.230769	0.5625	0.28125	0.642857	0.833333	0.361702	0.615385	0.722222	0.612245	0.4375	0.25
9198633	Open Sea	0.272727	0.292683	0.411765	0.5	0.607143	0.3125	0.25	0.619048	0.5	0.472222	0.285714	0.185185	0.34375	0.333333	0.290323	0.212766	0.171429	0.333333	0.225806	0.375	0.413793	0.4	0.315789	0.2	0.266667	0.173913	0.173913	0.391304	0.243243	0.193548	0.206897	0.272727	0.4375	0.125	0.4	0.195122	0.25	0.272727	0.590909	0.421053	0.869565	0.684211	0.484848	0.684211	0.5	0.683333	0.666667	0.666667
9620341	Island	0.696429	0.777778	0.703704	0.675	0.833333	0.880952	0.888889	0.692308	0.72	0.6	0.5	0.542857	0.557692	0.477273	0.507246	0.423077	0.372881	0.459459	0.557692	0.783333	0.585366	0.729167	0.438596	0.566667	0.458333	0.428571	0.74359	0.774648	0.45	0.655172	0.45614	0.350515	0.490196	0.75	0.238095	0.730769	0.578947	0.571429	0.615385	0.555556	0.851852	0.818182	0.830189	0.888889	0.911765	0.744681	0.714286	0.588235
9620343	Island	0.642857	0.764706	0.654545	0.631579	0.756098	0.815789	0.759259	0.727273	0.608696	0.627119	0.40625	0.542857	0.442308	0.443182	0.5	0.26	0.254237	0.388889	0.44898	0.789474	0.486486	0.604651	0.346154	0.482759	0.25	0.392857	0.756757	0.708333	0.428571	0.666667	0.525424	0.305882	0.480769	0.678571	0.3	0.641026	0.509091	0.565217	0.730769	0.466667	0.821429	0.761905	0.75	0.708333	0.8	0.534884	0.7	0.368421
9620345	Island	0.74	0.826087	0.941176	0.757576	0.846154	0.833333	0.788462	0.727273	0.727273	0.660714	0.642857	0.612903	0.64	0.576471	0.606061	0.413043	0.413793	0.567164	0.489796	0.897959	0.571429	0.675	0.489796	0.535714	0.333333	0.518519	0.828571	0.757143	0.471698	0.765957	0.526316	0.361446	0.634615	0.826923	0.3	0.722222	0.615385	0.545455	0.666667	0.568182	0.888889	0.75	0.851064	0.822222	0.892857	0.682927	0.611111	0.647059
9620347	Island	0.714286	0.782609	0.686275	0.757576	0.756757	0.875	0.808511	0.909091	0.619048	0.6	0.583333	0.551724	0.644444	0.60241	0.671875	0.326087	0.433333	0.612903	0.54	0.767442	0.529412	0.675676	0.478261	0.571429	0.333333	0.615385	0.857143	0.703125	0.54717	0.666667	0.473684	0.488095	0.666667	0.723404	0.391304	0.657143	0.571429	0.526316	0.615385	0.571429	0.88	0.842105	0.875	0.906977	0.846154	0.644737	0.764706	0.666667
9620349	Island	0.847826	0.847826	0.895833	0.633333	0.833333	0.851852	0.840909	0.809524	0.7	0.666667	0.48	0.709677	0.615385	0.671053	0.677966	0.534884	0.37931	0.59322	0.612245	0.825	0.625	0.727273	0.512195	0.52	0.309524	0.521739	0.914286	0.810345	0.520833	0.783784	0.612245	0.475	0.697674	0.818182	0.454545	0.625	0.666667	0.5	0.75	0.690476	0.904762	0.722222	0.886364	0.878049	0.791667	0.712329	0.714286	0.8
9620351	Island	0.744681	0.822222	0.957447	0.677419	0.805556	0.888889	0.674419	0.863636	0.55	0.608696	0.5	0.645161	0.564103	0.52	0.525424	0.44186	0.421053	0.5	0.510638	0.725	0.59375	0.666667	0.634146	0.458333	0.325581	0.478261	0.885714	0.689655	0.5	0.647059	0.541667	0.4375	0.545455	0.627907	0.363636	0.634921	0.6	0.3125	0.75	0.52381	0.8	0.764706	0.767442	0.95122	0.863636	0.630137	0.714286	0.6
9620353	Island	0.869565	0.866667	0.978723	0.793103	0.666667	0.923077	0.822222	0.761905	0.578947	0.765957	0.625	0.7	0.540541	0.611111	0.711864	0.465116	0.462963	0.610169	0.608696	0.815789	0.7	0.787879	0.414634	0.625	0.488889	0.565217	0.882353	0.807018	0.510638	0.757576	0.659574	0.571429	0.619048	0.790698	0.363636	0.709677	0.6	0.5625	0.666667	0.619048	0.9	0.733333	0.813953	0.853659	0.952381	0.652778	0.6875	0.588235
9620355	Island	0.815789	0.871795	0.886364	0.913043	0.9	0.916667	0.926829	0.894737	0.722222	0.690476	0.619048	0.633333	0.653846	0.578947	0.642857	0.472222	0.617021	0.674419	0.540541	0.823529	0.68	0.75	0.424242	0.652174	0.583333	0.684211	0.9	0.795918	0.358974	0.8125	0.547619	0.485294	0.657895	0.823529	0.3125	0.692308	0.533333	0.692308	0.869565	0.736842	1	0.923077	0.757576	0.888889	0.95	0.709677	0.769231	0.642857
9620357	Island	0.837838	0.810811	0.818182	0.736842	0.785714	0.913043	0.9	1	0.6875	0.8	0.65	0.655172	0.692308	0.653846	0.773585	0.647059	0.444444	0.675	0.484848	0.8	0.833333	0.741935	0.606061	0.5	0.527778	0.631579	0.862069	0.808511	0.486486	0.764706	0.604651	0.61194	0.72973	0.852941	0.3125	0.711538	0.766667	0.785714	0.875	0.717949	0.9375	0.727273	0.969697	0.794118	1	0.745763	0.75	0.857143
9620359	Island	0.888889	0.833333	0.880952	0.894737	0.888889	0.954545	0.878049	0.9375	0.866667	0.684211	0.857143	0.793103	0.807692	0.770833	0.773585	0.75	0.6	0.846154	0.419355	0.852941	0.791667	0.8	0.727273	0.85	0.575758	0.6	0.892857	0.911111	0.552632	0.903226	0.85	0.734375	0.75	0.90625	0.333333	0.734694	0.7	0.466667	0.916667	0.842105	1	0.909091	0.9	0.9375	0.95	0.896552	0.909091	1
9620361	Island	0.655172	0.4	0.628571	0.73913	0.772727	0.809524	0.75	0.866667	0.769231	0.611111	0.555556	0.535714	0.461538	0.590909	0.489362	0.347826	0.411765	0.571429	0.481481	0.666667	0.466667	0.736842	0.645161	0.789474	0.483871	0.529412	0.806452	0.722222	0.5	0.647059	0.47619	0.446429	0.75	0.8	0.533333	0.702128	0.551724	0.5	0.809524	0.555556	0.846154	0.666667	0.777778	0.862069	0.888889	0.702703	0.727273	0.642857
9620363	Island	0.791667	0.30303	0.764706	0.684211	0.789474	0.625	0.8	0.666667	0.384615	0.371429	0.35	0.322581	0.466667	0.512195	0.413043	0.263158	0.322581	0.487805	0.416667	0.589744	0.25	0.6	0.486486	0.294118	0.461538	0.2	0.777778	0.763158	0.428571	0.46875	0.459459	0.339286	0.730769	0.68	0.235294	0.55814	0.48	0.461538	0.6	0.5	0.785714	0.4	0.608696	0.833333	0.875	0.647059	0.636364	0.923077
9620365	Island	0.869565	0.405405	0.757576	0.6	0.947368	0.928571	0.827586	0.875	0.615385	0.676471	0.7	0.62069	0.566667	0.675676	0.55	0.190476	0.551724	0.622222	0.56	0.641026	0.571429	0.777778	0.617647	0.533333	0.56	0.75	0.774194	0.945946	0.555556	0.657143	0.594595	0.464286	0.68	0.727273	0.5	0.785714	0.708333	0.545455	0.789474	0.666667	0.8	0.636364	0.818182	0.785714	0.722222	0.733333	0.727273	0.928571
9620369	Island	0.68	0.52	0.641026	0.7	0.588235	0.75	0.806452	0.833333	0.529412	0.421053	0.310345	0.34375	0.323529	0.589744	0.4	0.153846	0.315789	0.395833	0.4	0.567568	0.647059	0.772727	0.461538	0.333333	0.37037	0.352941	0.692308	0.537037	0.433333	0.394737	0.5	0.342105	0.548387	0.689655	0.304348	0.765957	0.52	0.3125	0.789474	0.25	0.818182	0.538462	0.6	0.678571	0.588235	0.481481	0.846154	0.6
9620373	Island	0.84375	0.691176	0.659574	0.580645	0.75	0.84375	0.795455	0.75	0.583333	0.530612	0.527778	0.55814	0.595745	0.644444	0.6	0.25	0.510638	0.430769	0.485714	0.75	0.666667	0.742857	0.4	0.483871	0.424242	0.391304	0.529412	0.7	0.414634	0.607143	0.555556	0.303371	0.604651	0.634146	0.46875	0.568966	0.534884	0.5	0.578947	0.452381	0.818182	0.8	0.785714	0.8	0.909091	0.512195	0.75	0.571429
9620375	Island	0.861111	0.611111	0.58	0.69697	0.857143	0.852941	0.808511	0.744186	0.692308	0.538462	0.5	0.489362	0.509804	0.54	0.677966	0.212121	0.456522	0.409091	0.5	0.79661	0.625	0.641026	0.375	0.4375	0.457143	0.521739	0.659091	0.761905	0.488889	0.627119	0.4375	0.505155	0.625	0.731707	0.470588	0.719298	0.477273	0.52381	0.681818	0.522727	0.769231	0.809524	0.862069	0.744681	0.76	0.510638	0.73913	0.625
9620377	Island	0.785714	0.873418	0.830508	0.790698	0.8	0.911111	0.803571	0.913043	0.806452	0.698113	0.68	0.678571	0.75	0.736842	0.8	0.717949	0.673077	0.644737	0.6	0.848485	0.809524	0.836735	0.633803	0.611111	0.521739	0.666667	0.693878	0.896907	0.591837	0.777778	0.634615	0.65	0.904762	0.854167	0.555556	0.838235	0.678571	0.64	0.666667	0.836364	1	0.869565	0.8125	0.949153	0.961538	0.633333	0.75	0.888889
9620379	Island	0.809524	0.654762	0.779661	0.688889	0.833333	0.8	0.714286	0.956522	0.59375	0.464286	0.529412	0.568966	0.74	0.53125	0.676923	0.44186	0.433962	0.453333	0.512195	0.846154	0.6	0.72549	0.48	0.461538	0.382979	0.419355	0.68	0.838384	0.54	0.651515	0.603774	0.398374	0.861538	0.64	0.5	0.666667	0.654545	0.56	0.633333	0.661017	0.842105	0.652174	0.818182	0.898305	0.740741	0.539683	0.592593	0.764706
9620381	Island	0.891304	0.826087	0.915254	0.82	0.903226	0.924528	0.833333	0.980769	0.69697	0.870968	0.764706	0.730159	0.811321	0.811594	0.869565	0.791667	0.807692	0.703704	0.680851	0.923077	0.863636	0.901961	0.717949	0.575	0.490566	0.8	0.87037	0.865385	0.769231	0.784615	0.722222	0.609375	0.882353	0.943396	0.742857	0.837838	0.741379	0.518519	0.766667	0.846154	0.952381	0.909091	0.909091	1	1	0.796875	0.821429	0.941176
9620383	Island	0.804348	0.891304	0.873016	0.833333	0.935484	0.927273	0.880597	0.867925	0.828571	0.761194	0.75	0.640625	0.709091	0.826087	0.774648	0.673077	0.740741	0.743902	0.708333	0.846154	0.804348	0.830189	0.675325	0.634146	0.592593	0.666667	0.810345	0.954128	0.727273	0.84127	0.685185	0.651515	0.811594	0.87037	0.941176	0.909091	0.719298	0.62963	0.766667	0.776119	1	0.76	0.820513	0.939394	1	0.876923	0.862069	0.842105
9620385	Island	0.727273	0.878788	0.714286	0.696429	0.837838	0.733333	0.810811	0.828571	0.634146	0.557143	0.438596	0.571429	0.6	0.626667	0.505882	0.40625	0.37931	0.43956	0.45	0.785714	0.709091	0.7	0.551282	0.375	0.418182	0.413793	0.8	0.768595	0.508772	0.447761	0.610169	0.454545	0.670886	0.75	0.439024	0.692308	0.507937	0.482759	0.666667	0.621622	0.909091	0.757576	0.829787	0.839506	0.914286	0.536232	0.71875	0.809524
9620387	Island	0.935484	0.884615	0.819444	0.75	0.948718	0.873016	0.863014	0.921053	0.795455	0.712329	0.661017	0.675676	0.78125	0.717949	0.733333	0.569231	0.622951	0.617021	0.590164	0.9	0.781818	0.828125	0.75641	0.55102	0.491525	0.566667	0.919355	0.896	0.678571	0.746269	0.666667	0.616438	0.822785	0.83871	0.780488	0.770833	0.550725	0.551724	0.764706	0.68	0.956522	0.891892	0.938776	0.942529	0.945946	0.71831	0.75	0.809524
10225873	Island	1	0.831461	0.875	0.93617	0.942029	0.935065	0.910256	0.919355	0.944444	0.845361	0.914286	0.860759	0.833333	0.949367	0.848485	0.877193	0.806452	0.90411	0.757576	0.774648	0.785714	0.912088	0.898551	0.8125	0.758621	0.789474	0.84507	0.821782	0.909091	1	0.877778	0.850746	0.917808	0.922222	0.756098	0.63964	0.820513	0.962963	0.921053	0.864407	0.966667	0.96875	0.873016	0.908046	0.883721	0.87619	0.928571	0.916667
10225875	Island	0.984615	0.97561	0.962264	0.977273	0.916667	0.935897	0.961538	0.984127	0.941176	0.893617	0.971014	0.945205	0.910448	0.975309	0.911765	0.931034	0.934426	0.933333	0.902778	0.890411	1	0.923077	0.955224	0.87234	0.910714	0.973684	0.890411	0.915094	0.965517	0.935484	0.921348	0.954545	0.942857	0.955056	0.837209	0.840708	0.886076	1	0.973684	0.984127	1	0.888889	0.96875	0.976744	0.953488	0.952381	0.965517	0.958333
10225877	Island	1	0.878049	0.964286	0.933333	0.849315	0.935065	0.95	0.952381	0.942857	0.817204	0.884058	0.945946	0.779412	0.857143	0.885714	0.881356	0.810345	0.868421	0.756757	0.77027	0.761905	0.880435	0.892308	0.804348	0.824561	0.564103	0.847222	0.883495	0.87931	0.84127	0.808989	0.865672	0.901408	0.868132	0.818182	0.631579	0.844156	0.892857	1	0.938462	1	0.894737	0.870968	0.977011	0.909091	0.916667	0.928571	1
10225879	Island	0.954545	0.880952	0.962963	0.916667	0.847222	0.884615	0.947368	0.870968	0.903226	0.784946	0.820896	0.84507	0.686567	0.75	0.746032	0.810345	0.745455	0.815789	0.75	0.746667	0.692308	0.822222	0.758065	0.734694	0.754386	0.684211	0.835616	0.805556	0.793103	0.854839	0.793103	0.772727	0.895522	0.866667	0.590909	0.526786	0.821918	0.92	1	0.877193	0.9375	0.947368	0.888889	0.931034	0.8	0.825688	0.846154	0.909091
10225881	Island	0.939394	0.797619	0.978723	0.916667	0.876712	0.910256	0.960526	0.932203	0.833333	0.820225	0.746269	0.861111	0.724638	0.807229	0.737705	0.852459	0.777778	0.84507	0.746835	0.657534	0.794872	0.846154	0.873016	0.765957	0.793103	0.657143	0.851351	0.719626	0.775862	0.890625	0.847059	0.818182	0.850746	0.866667	0.717391	0.522523	0.830986	0.814815	0.909091	0.896552	0.96875	0.947368	0.904762	0.954023	0.9	0.779817	0.846154	0.92
10225883	Island	0.936508	0.805195	0.934783	0.904762	0.869565	0.861111	0.942029	0.964912	0.833333	0.9	0.794118	0.742857	0.681818	0.716049	0.722222	0.84127	0.8	0.8	0.823529	0.695652	0.780488	0.9375	0.843137	0.803922	0.666667	0.676471	0.808824	0.788991	0.766667	0.915493	0.813333	0.804511	0.929577	0.825581	0.636364	0.551402	0.811594	0.65	0.942857	0.882353	0.933333	0.74359	0.862069	0.892473	0.756098	0.843478	0.965517	0.866667
10225885	Island	0.666667	0.575342	0.680851	0.767442	0.597015	0.554054	0.724638	0.745455	0.709677	0.560976	0.545455	0.6	0.575758	0.39759	0.54386	0.677966	0.529412	0.442857	0.560976	0.304348	0.534884	0.594937	0.557692	0.596154	0.473684	0.15625	0.647059	0.563107	0.534483	0.514286	0.465753	0.542636	0.520548	0.518519	0.28	0.224299	0.569231	0.578947	0.638889	0.666667	0.821429	0.675	0.688525	0.861702	0.44186	0.706897	0.645161	0.714286
10225887	Island	0.8	0.712329	0.8125	0.744186	0.816667	0.708333	0.865672	0.763636	0.758621	0.658228	0.523077	0.634921	0.6	0.529412	0.561404	0.568966	0.615385	0.57971	0.644737	0.56338	0.52381	0.693333	0.607843	0.612245	0.571429	0.5	0.584615	0.631068	0.561404	0.636364	0.621622	0.612403	0.565217	0.740741	0.367347	0.315315	0.634921	0.578947	0.685714	0.653846	0.857143	0.6	0.622951	0.771739	0.682927	0.683761	0.633333	0.714286
10225889	Island	0.830508	0.736111	0.680851	0.9	0.810345	0.771429	0.893939	0.826923	0.9	0.753086	0.75	0.774194	0.716418	0.655172	0.627119	0.8	0.735849	0.736842	0.618421	0.611111	0.627907	0.797297	0.826923	0.76	0.571429	0.4375	0.823529	0.676471	0.741935	0.772727	0.723684	0.753968	0.84058	0.8	0.673469	0.442478	0.746032	0.705882	0.857143	0.72549	0.833333	0.761905	0.903226	0.866667	0.804878	0.842105	0.7	0.851852
10225891	Island	0.683333	0.573171	0.446809	0.731707	0.703704	0.64	0.820896	0.693878	0.78125	0.613333	0.553846	0.571429	0.521127	0.467391	0.415385	0.637931	0.462963	0.417722	0.475	0.447761	0.465116	0.573333	0.58	0.596154	0.45	0.1875	0.585714	0.579439	0.46875	0.555556	0.454545	0.572519	0.633803	0.530864	0.395833	0.178571	0.492754	0.631579	0.735294	0.660714	0.8	0.585366	0.698413	0.747253	0.682927	0.566372	0.558824	0.607143
10225893	Island	0.75	0.5875	0.595745	0.692308	0.75	0.68	0.818182	0.734694	0.75	0.727273	0.5	0.677419	0.514706	0.544444	0.580645	0.655172	0.535714	0.493671	0.573171	0.492308	0.463415	0.722222	0.62	0.634615	0.5	0.46875	0.549296	0.563107	0.603175	0.637931	0.589744	0.574803	0.637681	0.592593	0.333333	0.19469	0.651515	0.571429	0.852941	0.62963	0.821429	0.613636	0.709677	0.845238	0.65	0.706897	0.742857	0.666667
10225895	Island	0.779661	0.641026	0.680851	0.868421	0.781818	0.727273	0.911765	0.77551	0.862069	0.730769	0.491803	0.727273	0.651515	0.549451	0.633333	0.678571	0.564516	0.5375	0.65	0.470588	0.682927	0.694444	0.72549	0.6875	0.525424	0.272727	0.716418	0.653465	0.533333	0.633333	0.594937	0.671875	0.735294	0.662651	0.511111	0.327586	0.6	0.7	0.911765	0.685185	0.793103	0.782609	0.786885	0.8	0.769231	0.705882	0.75	0.923077
10225897	Island	0.967742	0.811594	0.744186	0.947368	0.851852	0.92	1	0.924528	0.903226	0.90411	0.703125	0.785714	0.731343	0.722222	0.839286	0.678571	0.731343	0.829268	0.781609	0.676471	0.658537	0.857143	0.851852	0.74359	0.803279	0.805556	0.779412	0.789474	0.774194	0.742424	0.871795	0.776923	0.875	0.886076	0.725	0.521008	0.777778	0.789474	0.833333	0.861538	0.892857	0.804348	0.903226	0.95	0.7	0.84252	0.96875	0.727273
10225899	Island	0.745763	0.689189	0.731707	0.648649	0.679245	0.710145	0.833333	0.7	0.8125	0.69863	0.59375	0.768116	0.569444	0.521739	0.625	0.622642	0.546875	0.506494	0.474359	0.471429	0.627907	0.723077	0.75	0.627907	0.47541	0.545455	0.580645	0.602151	0.52381	0.476923	0.52	0.643411	0.588235	0.597403	0.452381	0.372881	0.516667	0.470588	0.710526	0.60274	0.69697	0.702128	0.660714	0.790698	0.7	0.705426	0.735294	0.791667
10225901	Island	0.913793	0.611111	0.682927	0.837838	0.698113	0.901408	0.870968	0.78	0.757576	0.708333	0.661538	0.779412	0.643836	0.623656	0.631579	0.773585	0.59375	0.628205	0.597403	0.623188	0.55	0.75	0.775862	0.6	0.622951	0.575758	0.612903	0.608696	0.703125	0.6	0.643836	0.679688	0.661765	0.710526	0.55814	0.442478	0.721311	0.625	0.794872	0.767123	0.8125	0.723404	0.728814	0.942529	0.682927	0.773438	0.878788	0.826087
10225903	Island	0.779661	0.684932	0.536585	0.757576	0.574074	0.589041	0.8125	0.634615	0.551724	0.606061	0.377049	0.71875	0.458333	0.402174	0.5	0.589286	0.453125	0.43038	0.315789	0.403226	0.525	0.642857	0.6	0.463415	0.442623	0.382353	0.46875	0.444444	0.421053	0.333333	0.5	0.552	0.5	0.493506	0.459459	0.26087	0.631579	0.571429	0.625	0.72	0.758621	0.659574	0.688525	0.770115	0.457143	0.601626	0.6875	0.65
10225905	Island	0.9	0.780822	0.634146	0.806452	0.784314	0.926471	0.90625	0.867925	0.96875	0.765625	0.7	0.863636	0.704225	0.645161	0.72	0.740741	0.757576	0.7125	0.631579	0.730159	0.697674	0.758621	0.709091	0.697674	0.650794	0.677419	0.694915	0.781609	0.696429	0.625	0.794521	0.712	0.764706	0.822785	0.658537	0.482759	0.836364	0.8125	0.902439	0.842105	0.928571	0.787234	0.890909	0.895349	0.75	0.841667	0.931034	0.952381
10225907	Island	0.932203	0.662162	0.565217	0.685714	0.681818	0.8	0.95	0.732143	0.852941	0.761905	0.580645	0.76	0.647887	0.494624	0.641509	0.722222	0.690141	0.658228	0.594937	0.542373	0.586957	0.754386	0.810345	0.674419	0.640625	0.633333	0.580645	0.653061	0.603175	0.698413	0.710145	0.672727	0.716667	0.705128	0.488372	0.365079	0.732143	0.777778	0.846154	0.756757	0.88	0.744681	0.62069	0.886364	0.682927	0.740741	0.833333	0.8
10225909	Island	0.896552	0.815789	0.688889	0.852941	0.809524	0.909091	0.885246	0.87037	0.852941	0.741379	0.754098	0.876712	0.760563	0.663043	0.754386	0.842105	0.712329	0.691358	0.576923	0.650794	0.727273	0.775862	0.819672	0.674419	0.671429	0.733333	0.630769	0.735294	0.815385	0.727273	0.676923	0.798246	0.883333	0.7875	0.595238	0.464567	0.745455	0.894737	0.868421	0.855263	0.916667	0.714286	0.827586	0.931034	0.833333	0.834862	0.875	0.846154
10225911	Island	0.915254	0.77027	0.818182	0.888889	0.761905	0.885714	0.966667	0.912281	0.857143	0.711864	0.693548	0.882353	0.661972	0.712766	0.8	0.816667	0.723684	0.740741	0.649351	0.727273	0.682927	0.830508	0.813559	0.8	0.75	0.645161	0.746269	0.72549	0.828125	0.811594	0.769231	0.789474	0.77193	0.814815	0.681818	0.459677	0.881356	0.842105	0.75	0.866667	0.92	0.891304	0.862069	0.931034	0.875	0.9	0.969697	0.961538
10225913	Island	0.901639	0.648649	0.73913	0.641026	0.666667	0.855072	0.85	0.759259	0.702703	0.566667	0.622951	0.757143	0.541667	0.676768	0.714286	0.75	0.727273	0.590361	0.473684	0.707692	0.534884	0.806452	0.775862	0.680851	0.702703	0.612903	0.558824	0.641509	0.646154	0.637681	0.661538	0.752137	0.709677	0.74026	0.604651	0.403101	0.618182	0.714286	0.75	0.873239	0.727273	0.75	0.741379	0.829787	0.8	0.867925	0.628571	0.777778
10225915	Island	0.954545	0.780822	0.866667	0.756098	0.722222	0.811594	0.935484	0.854545	0.769231	0.746032	0.569231	0.785714	0.653333	0.676768	0.78125	0.714286	0.671053	0.714286	0.626667	0.65625	0.604167	0.803279	0.842105	0.75	0.657895	0.65625	0.753623	0.722222	0.676923	0.56338	0.666667	0.791667	0.709677	0.666667	0.555556	0.455224	0.709091	0.909091	0.714286	0.814286	0.85	0.826087	0.862069	0.868132	0.880952	0.859649	0.810811	0.896552
10225917	Island	0.892308	0.777778	0.863636	0.7	0.666667	0.84058	0.83871	0.789474	0.794872	0.609375	0.6	0.708333	0.6	0.673077	0.671642	0.78125	0.653846	0.56962	0.445946	0.612903	0.645833	0.813559	0.75	0.680851	0.513158	0.548387	0.608696	0.642202	0.545455	0.577465	0.657143	0.756098	0.738462	0.654321	0.644444	0.447761	0.736842	0.722222	0.711538	0.774648	0.75	0.782609	0.683333	0.819149	0.744186	0.769912	0.916667	0.827586
10225919	Island	0.940299	0.785714	0.82	0.761905	0.685714	0.945205	0.928571	0.916667	0.804878	0.769231	0.656716	0.826667	0.730769	0.745283	0.815789	0.833333	0.716049	0.651163	0.64557	0.737705	0.705882	0.931034	0.849057	0.833333	0.73494	0.648649	0.705882	0.774775	0.671642	0.8	0.759494	0.832	0.828125	0.775	0.72093	0.526718	0.892308	0.869565	0.839286	0.88	0.863636	0.869565	0.803571	0.904255	0.9	0.843478	0.897436	0.933333
10225921	Island	0.929577	0.837838	0.735849	0.780488	0.694444	0.9	0.895522	0.870968	0.931818	0.707692	0.75	0.794872	0.636364	0.759259	0.772152	0.890411	0.707317	0.666667	0.642857	0.815385	0.604167	0.907692	0.781818	0.76	0.650602	0.763158	0.648649	0.754545	0.732394	0.666667	0.7375	0.780303	0.806452	0.752941	0.674419	0.522388	0.706667	0.84	0.803571	0.868421	0.904762	0.891304	0.77193	0.851485	0.865385	0.831933	0.820513	0.966667
10225923	Island	0.892857	0.738095	0.763636	0.875	0.837209	0.839506	0.881579	0.84507	0.897959	0.738095	0.746835	0.809524	0.753247	0.722689	0.849462	0.818182	0.823529	0.645833	0.625	0.671642	0.775862	0.828125	0.79661	0.826923	0.75	0.756098	0.7	0.745902	0.753425	0.654321	0.712644	0.84	0.805556	0.788889	0.576923	0.506579	0.806818	0.724138	0.887097	0.768293	0.961538	0.851064	0.833333	0.864078	0.763636	0.844262	0.911111	0.90625
10225925	Island	0.860465	0.770115	0.946429	0.764706	0.818182	0.870588	0.805195	0.902778	0.755102	0.709302	0.590361	0.843373	0.657895	0.658915	0.757895	0.780488	0.784091	0.715686	0.659091	0.710145	0.758621	0.850746	0.779661	0.8	0.731707	0.613636	0.715909	0.785714	0.786667	0.675	0.728261	0.771242	0.897436	0.737374	0.679245	0.558442	0.706522	0.586207	0.904762	0.795181	0.923077	0.857143	0.830508	0.796117	0.763636	0.848	0.934783	0.939394
10225927	Island	0.853933	0.747126	0.898305	0.777778	0.652174	0.789474	0.8625	0.72973	0.843137	0.666667	0.569767	0.729412	0.658824	0.641221	0.587629	0.764706	0.613636	0.584906	0.483516	0.583333	0.661017	0.681159	0.65	0.703704	0.559524	0.608696	0.626374	0.623077	0.586667	0.531646	0.648936	0.702532	0.714286	0.634615	0.355932	0.462025	0.62766	0.551724	0.757576	0.752941	0.821429	0.755102	0.716667	0.814815	0.660714	0.793893	0.829787	0.882353
10225929	Island	0.9	0.655172	0.691176	0.701754	0.711111	0.849462	0.833333	0.8625	0.788462	0.690722	0.544444	0.755319	0.651685	0.651515	0.74	0.774194	0.681319	0.564815	0.621053	0.532468	0.672131	0.726027	0.698413	0.696429	0.569767	0.666667	0.655914	0.661538	0.556962	0.558442	0.673684	0.709877	0.779221	0.709091	0.451613	0.407407	0.591837	0.612903	0.80303	0.795181	0.966667	0.76	0.803279	0.8	0.677419	0.788321	0.791667	0.882353
10225931	Island	0.927835	0.719101	0.728571	0.885246	0.857143	0.785714	0.858696	0.869048	0.763636	0.76699	0.619565	0.851485	0.686869	0.633588	0.759615	0.760417	0.6875	0.617391	0.583333	0.653846	0.6875	0.826667	0.793651	0.711864	0.674419	0.636364	0.734694	0.737226	0.705882	0.765432	0.704082	0.748466	0.766234	0.726496	0.476923	0.442424	0.676471	0.771429	0.787879	0.806818	0.933333	0.745098	0.777778	0.854545	0.784615	0.858156	0.788462	0.848485
10225933	Island	0.888889	0.717391	0.680556	0.777778	0.8	0.787879	0.879121	0.880952	0.818182	0.712963	0.56383	0.819048	0.77	0.647059	0.784314	0.79798	0.663265	0.601695	0.554455	0.602564	0.630769	0.8625	0.661538	0.733333	0.670455	0.586957	0.701031	0.76087	0.715909	0.710843	0.717172	0.759036	0.810127	0.719008	0.507463	0.433735	0.669811	0.583333	0.838235	0.806818	0.909091	0.754717	0.836066	0.891892	0.830769	0.826389	0.865385	0.941176
10225935	Island	0.878261	0.639175	0.692308	0.701493	0.578947	0.773585	0.883495	0.696629	0.746032	0.657658	0.584158	0.707965	0.580952	0.527778	0.558559	0.663462	0.594059	0.532258	0.52381	0.55	0.573529	0.682353	0.647887	0.540984	0.519608	0.571429	0.609091	0.676056	0.56701	0.523256	0.530612	0.684783	0.724138	0.553846	0.469697	0.271676	0.654545	0.552632	0.736111	0.844444	0.878049	0.735849	0.695652	0.817391	0.642857	0.727273	0.653846	0.85
10225937	Island	0.923077	0.71875	0.72093	0.772727	0.862069	0.847619	0.924528	0.89011	0.809524	0.728814	0.740385	0.75	0.707071	0.723684	0.793103	0.771429	0.663636	0.683761	0.669903	0.583333	0.71831	0.816092	0.786667	0.688525	0.660194	0.666667	0.720721	0.684932	0.731959	0.811765	0.693878	0.751323	0.8	0.713235	0.5	0.434286	0.807018	0.815789	0.813333	0.865979	0.860465	0.901961	0.833333	0.862069	0.75	0.865854	0.918367	0.875
10225939	Island	0.91129	0.724138	0.775281	0.837838	0.784615	0.866667	0.885246	0.869565	0.828125	0.766423	0.690909	0.860294	0.745283	0.770053	0.766917	0.736842	0.747664	0.692308	0.623656	0.731183	0.666667	0.851064	0.761905	0.738462	0.743119	0.666667	0.690909	0.66	0.583333	0.817204	0.688073	0.84466	0.783505	0.76875	0.662162	0.403226	0.81746	0.586957	0.910256	0.838384	0.916667	0.942308	0.884615	0.863636	0.714286	0.862857	0.833333	0.714286
10225941	Island	0.945312	0.834711	0.905263	0.886076	0.876712	0.934426	0.945736	0.861702	0.920635	0.861111	0.743119	0.866197	0.785047	0.882353	0.84058	0.858407	0.761062	0.748031	0.752688	0.854167	0.779221	0.886598	0.802326	0.867647	0.777778	0.75	0.745455	0.795031	0.777778	0.910112	0.844037	0.82381	0.901961	0.777778	0.68	0.538043	0.792593	0.75	0.884615	0.894737	0.980769	0.942308	0.921053	0.902985	0.858824	0.883721	0.964286	0.939394
10225943	Island	0.992754	0.927419	0.755102	0.876712	0.961538	0.891473	0.911111	0.961538	0.970149	0.932432	0.81982	0.913669	0.888889	0.937173	0.934211	0.939655	0.910714	0.931818	0.869565	0.942857	0.878049	0.92	0.943182	0.881356	0.95283	0.8	0.929134	0.8625	0.928571	0.930233	0.92	0.961538	0.980198	0.924528	0.894737	0.80663	0.932331	0.941176	0.923077	0.989362	1	0.918367	0.948718	0.965035	0.952941	0.94086	0.983051	0.948718
10225945	Island	0.902256	0.815385	0.582524	0.763889	0.8	0.81746	0.862319	0.84466	0.835821	0.745098	0.542373	0.784722	0.669492	0.755435	0.805031	0.752212	0.697248	0.597015	0.62766	0.679245	0.73494	0.861386	0.744898	0.733333	0.745283	0.604167	0.761905	0.710059	0.690265	0.772727	0.695312	0.708333	0.740741	0.734568	0.527027	0.371585	0.779528	0.722222	0.752809	0.828571	0.932203	0.784314	0.846154	0.877551	0.738095	0.816754	0.912281	0.72973
10225947	Island	0.899225	0.802721	0.722222	0.705882	0.869565	0.788618	0.892617	0.90099	0.881579	0.875	0.652893	0.810219	0.788136	0.792746	0.838926	0.87156	0.742574	0.700787	0.692308	0.780702	0.780822	0.798165	0.709091	0.757576	0.803922	0.822222	0.858268	0.830409	0.767241	0.802198	0.709924	0.809302	0.814159	0.770186	0.662651	0.502618	0.837398	0.763636	0.825	0.911504	0.953125	0.770492	0.865169	0.934641	0.783784	0.921182	0.9	0.885714
10225949	Island	0.929688	0.695946	0.925234	0.652778	0.761364	0.773109	0.938356	0.707547	0.779221	0.842466	0.699115	0.731884	0.831933	0.746193	0.798658	0.803738	0.737374	0.755906	0.741573	0.743363	0.712329	0.824074	0.725664	0.848485	0.772277	0.777778	0.876923	0.808383	0.836207	0.777778	0.775194	0.741784	0.794643	0.753247	0.670886	0.579787	0.741935	0.754717	0.814815	0.868421	0.983871	0.918033	0.855556	0.854305	0.8	0.82266	0.877551	0.857143
10602415	Open Sea	0.382022	0.703297	0.73913	0.509091	0.459459	0.521739	0.490566	0.720588	0.5	0.525773	0.373626	0.442105	0.761194	0.55	0.488722	0.303371	0.338028	0.426471	0.390625	0.506329	0.701754	0.566265	0.295082	0.5	0.490566	0.428571	0.415584	0.492537	0.43662	0.372881	0.396552	0.3	0.596154	0.31068	0.268293	0.21374	0.259259	0.363636	0.785714	0.786517	0.948718	0.971429	0.7875	0.895833	0.909091	0.757812	0.911111	0.731707
10687131	Open Sea	0.6	0.605263	0.55814	0.826087	0.645161	0.575758	0.641509	0.583333	0.631579	0.475	0.56	0.466667	0.615385	0.612245	0.396226	0.433333	0.388889	0.583333	0.371429	0.521739	0.5	0.615385	0.444444	0.461538	0.30303	0.5	0.588235	0.510638	0.472222	0.655172	0.555556	0.289157	0.633333	0.428571	0.454545	0.298246	0.566667	0.692308	0.636364	0.658537	0.923077	0.75	0.71875	0.714286	0.952381	0.853659	0.857143	0.736842
10687135	Open Sea	0.447917	0.516484	0.468085	0.666667	0.519481	0.623377	0.534091	0.696629	0.518519	0.459459	0.534247	0.57971	0.457944	0.511811	0.266055	0.475	0.443182	0.591398	0.373494	0.506494	0.306452	0.554348	0.333333	0.538462	0.307692	0.404255	0.295455	0.432	0.308824	0.428571	0.444444	0.269036	0.693878	0.527778	0.226415	0.331034	0.444444	0.677419	0.559322	0.670455	0.893617	0.756757	0.641975	0.7	0.733333	0.814159	0.697674	0.777778
10687137	Open Sea	0.367347	0.625	0.640449	0.589286	0.402597	0.418919	0.517241	0.597701	0.5	0.363636	0.4	0.476923	0.287037	0.504425	0.263636	0.445946	0.445783	0.538462	0.43038	0.532468	0.333333	0.494382	0.23	0.473684	0.320988	0.340426	0.309524	0.404959	0.272727	0.411765	0.4	0.257732	0.604167	0.447368	0.215686	0.319149	0.354167	0.5625	0.418182	0.608247	0.847826	0.707317	0.594937	0.72381	0.777778	0.745614	0.608696	0.708333
10687139	Open Sea	0.511111	0.623377	0.560976	0.5625	0.515625	0.538462	0.614286	0.593023	0.581395	0.566372	0.408451	0.633333	0.45098	0.565574	0.265306	0.467532	0.481013	0.7	0.465909	0.594595	0.419355	0.552941	0.325581	0.565217	0.394366	0.348837	0.413793	0.438095	0.277778	0.461538	0.473684	0.333333	0.614458	0.546875	0.183673	0.43609	0.450549	0.545455	0.711864	0.590361	0.938776	0.789474	0.722222	0.791209	0.814815	0.773109	0.886364	0.75
11230923	Open Sea	0.407407	0.660714	0.485714	0.371429	0.540541	0.45098	0.307692	0.692308	0.482759	0.4	0.209302	0.46	0.405405	0.405405	0.254902	0.294118	0.2	0.404255	0.542857	0.347826	0.277778	0.291667	0.347826	0.48	0.162162	0.611111	0.6	0.533333	0.378378	0.234043	0.458333	0.215909	0.2	0.253731	0.190476	0.253521	0.186047	0.5	0.4	0.464286	0.636364	0.75	0.642857	0.76	0.8	0.719512	0.666667	0.266667
11230929	Open Sea	0.350877	0.473684	0.470588	0.333333	0.466667	0.5	0.3125	0.565217	0.464286	0.351852	0.229167	0.363636	0.371429	0.371795	0.181818	0.173077	0.285714	0.234043	0.5	0.333333	0.142857	0.173913	0.26087	0.375	0.15	0.578947	0.425	0.56338	0.386364	0.23913	0.403846	0.191011	0.173913	0.277778	0.142857	0.140845	0.230769	0.315789	0.4375	0.392157	0.73913	0.733333	0.491228	0.722222	0.666667	0.602564	0.423077	0.357143
11419113	Open Sea	0.466667	0.561798	0.62	0.265306	0.584906	0.571429	0.177419	0.435897	0.125	0.637681	0.578947	0.66	0.288136	0.458333	0.278689	0.25	0.235294	0.389831	0.285714	0.232558	0.40625	0.339623	0.333333	0.142857	0.195652	0.25	0.267857	0.168224	0.218182	0.271186	0.237288	0.190909	0.1875	0.279412	0.428571	0.188406	0.138462	0.26087	0.415094	0.186441	0.733333	0.538462	0.780488	0.637681	0.555556	0.626506	0.527778	0.785714
11572831	Open Sea	0.75	0.472727	0.473684	0.444444	0.37037	0.642857	0.386364	0.839286	0.380952	0.6	0.689655	0.581395	0.37037	0.338462	0.307692	0.173913	0.342857	0.272727	0.129032	0.34375	0.266667	0.1	0.254902	0.217391	0.230769	0.25	0.272727	0.1875	0.28125	0.234043	0.2	0.181818	0.548387	0.16129	0.24	0.160714	0.192308	0.307692	0.269231	0.40625	0.7	0.363636	0.380952	0.666667	0.366667	0.457831	0.571429	0.625
12013937	Island	0.62963	0.684211	0.909091	0.75	0.75	0.875	0.342105	0.666667	0.75	0.78	0.702703	0.735294	0.333333	0.526316	0.162162	0.611111	0.4	0.580645	0.473684	0.333333	0.230769	0.333333	0.607143	0.444444	0.472222	0.636364	0.6	0.436364	0.4375	0.357143	0.268293	0.545455	0.735294	0.52381	0.538462	0.678571	0.375	0.416667	0.5625	0.558824	0.454545	0.611111	0.95	0.809524	0.636364	0.606557	0.5	0.642857
12013939	Island	0.814815	0.631579	0.954545	0.85	0.676471	0.96	0.552632	0.814815	1	0.843137	0.837838	0.970588	0.380952	0.657895	0.351351	0.756757	0.666667	0.6875	0.619048	0.548387	0.8	0.684211	0.806452	0.684211	0.5	0.636364	0.731707	0.472727	0.8125	0.5	0.475	0.673913	0.885714	0.695652	0.642857	0.75	0.515152	0.545455	0.5625	0.75	0.818182	0.789474	0.954545	1	0.636364	0.806452	1	0.866667
12013941	Island	0.961538	0.763158	0.863636	0.75	0.771429	1	0.648649	0.777778	1	0.811321	0.891892	0.857143	0.285714	0.820513	0.486486	0.783784	0.692308	0.71875	0.826087	0.612903	0.733333	0.692308	0.78125	0.842105	0.578947	0.833333	0.837209	0.618182	0.764706	0.535714	0.564103	0.708333	0.848485	0.653846	0.692308	0.75	0.588235	0.454545	0.9375	0.777778	0.916667	0.842105	0.954545	0.909091	0.8	0.825397	0.916667	0.866667
12013943	Island	0.862069	0.621622	0.695652	0.7	0.542857	0.92	0.513514	0.724138	0.9375	0.773585	0.742857	0.888889	0.26087	0.560976	0.25641	0.641026	0.512195	0.5	0.619048	0.6	0.4375	0.5	0.787879	0.526316	0.405405	0.666667	0.744186	0.553571	0.470588	0.172414	0.512821	0.596154	0.647059	0.740741	0.615385	0.607143	0.5	0.5	0.647059	0.611111	0.833333	0.631579	0.954545	0.772727	0.636364	0.765625	1	0.866667
12013945	Island	0.827586	0.705882	0.681818	0.882353	0.558824	0.96	0.470588	0.730769	0.769231	0.75	0.6875	0.714286	0.380952	0.658537	0.305556	0.594595	0.536585	0.53125	0.631579	0.444444	0.466667	0.454545	0.740741	0.611111	0.457143	0.6	0.627907	0.436364	0.615385	0.344828	0.358974	0.528302	0.37931	0.580645	0.5	0.551724	0.264706	0.666667	0.666667	0.6	0.75	0.529412	0.954545	0.772727	0.7	0.640625	0.916667	0.8
12013955	Island	0.5	0.375	0.59375	0.357143	0.323529	0.432432	0.28	0.470588	0.411765	0.472222	0.36	0.428571	0.113636	0.170732	0.0930233	0.243902	0.138889	0.307692	0.348837	0.243243	0.125	0.217391	0.195652	0	0.133333	0.142857	0.382979	0.139535	0.26087	0.102041	0.0555556	0.211268	0.186047	0.384615	0.24	0.185185	0.047619	0.238095	0.111111	0.217391	0.388889	0.416667	0.419355	0.416667	0.272727	0.270833	0.2	0.285714
12013957	Island	0.7	0.58	0.764706	0.580645	0.235294	0.5	0.275862	0.444444	0.294118	0.52381	0.37037	0.5	0.142857	0.137255	0.107143	0.272727	0.075	0.309524	0.456522	0.257143	0.314286	0.375	0.352941	0.0740741	0.264706	0.157895	0.395833	0.27451	0.344828	0.266667	0.162162	0.190476	0.340426	0.431034	0.304348	0.20339	0.133333	0.227273	0.142857	0.345455	0.5	0.222222	0.677419	0.52	0.230769	0.365385	0.3125	0.272727
12013959	Island	0.853659	0.68	0.857143	0.818182	0.5	0.772727	0.46875	0.904762	0.555556	0.711111	0.535714	0.636364	0.230769	0.314815	0.232143	0.577778	0.195122	0.543478	0.695652	0.571429	0.388889	0.576923	0.58	0.333333	0.342857	0.5	0.528302	0.407407	0.612903	0.359375	0.261905	0.471264	0.469388	0.819672	0.565217	0.440678	0.23913	0.545455	0.538462	0.618182	0.823529	0.833333	0.875	0.72	0.461538	0.75	0.529412	0.565217
12013961	Island	0.804878	0.745098	0.888889	0.75	0.5	0.613636	0.393939	0.761905	0.666667	0.6	0.678571	0.545455	0.25	0.358491	0.241379	0.434783	0.261905	0.444444	0.608696	0.527778	0.333333	0.519231	0.54902	0.153846	0.323529	0.45	0.509434	0.358491	0.483871	0.285714	0.292683	0.453488	0.367347	0.770492	0.478261	0.396552	0.355556	0.318182	0.481481	0.636364	0.823529	0.777778	0.75	0.68	0.285714	0.607843	0.352941	0.416667
12013963	Island	0.875	0.811321	0.75	0.878788	0.69697	0.818182	0.575758	1	0.615385	0.772727	0.814815	0.615385	0.431373	0.388889	0.410714	0.574468	0.325	0.622222	0.755556	0.583333	0.5	0.615385	0.666667	0.37037	0.558824	0.55	0.596154	0.545455	0.633333	0.295082	0.375	0.590909	0.529412	0.844828	0.571429	0.438596	0.386364	0.636364	0.6	0.839286	0.882353	0.833333	0.96875	0.9375	0.428571	0.82	0.588235	0.6
12013965	Island	0.833333	0.77193	0.861111	0.818182	0.685714	0.869565	0.542857	0.904762	0.65	0.808511	0.785714	0.791667	0.294118	0.465517	0.360656	0.630435	0.375	0.55814	0.73913	0.594595	0.527778	0.622642	0.679245	0.37931	0.514286	0.55	0.696429	0.517241	0.548387	0.42623	0.452381	0.576087	0.5	0.852459	0.608696	0.532258	0.5	0.5	0.62963	0.894737	1	0.727273	0.90625	0.836735	0.714286	0.823529	0.578947	0.692308
12013967	Island	0.522727	0.383333	0.717949	0.588235	0.277778	0.586957	0.333333	0.52381	0.363636	0.5	0.419355	0.541667	0.122807	0.171875	0.0625	0.346939	0.142857	0.217391	0.222222	0.219512	0.210526	0.307692	0.365385	0.115385	0.216216	0.238095	0.206897	0.275862	0.451613	0.176471	0.186047	0.244681	0.346154	0.462687	0.285714	0.220588	0.1875	0.173913	0.222222	0.350877	0.705882	0.52381	0.606061	0.44898	0.333333	0.45	0.4	0.4
12013969	Island	0.780488	0.622951	0.9	0.742857	0.432432	0.697674	0.444444	0.809524	0.631579	0.647059	0.515152	0.708333	0.196429	0.25	0.174603	0.54	0.190476	0.425532	0.522727	0.439024	0.351351	0.381818	0.584906	0.227273	0.394737	0.52381	0.534483	0.375	0.5625	0.223881	0.238095	0.412371	0.333333	0.65625	0.5	0.328358	0.245283	0.26087	0.518519	0.509091	1	0.7	0.882353	0.638298	0.266667	0.677966	0.4	0.5
12013971	Island	0.604651	0.333333	0.769231	0.472222	0.189189	0.395349	0.228571	0.521739	0.368421	0.392157	0.393939	0.333333	0.140351	0.21875	0.109375	0.3	0.0714286	0.255319	0.340909	0.157895	0.108108	0.267857	0.283019	0.173913	0.189189	0.2	0.241379	0.160714	0.258065	0.151515	0.166667	0.244898	0.230769	0.4375	0.25	0.166667	0.0925926	0.136364	0.178571	0.339286	0.466667	0.473684	0.764706	0.468085	0.333333	0.35	0.4	0.321429
12013973	Island	0.860465	0.666667	0.8	0.736842	0.567568	0.674419	0.558824	0.869565	0.684211	0.6	0.647059	0.666667	0.196429	0.253968	0.129032	0.56	0.139535	0.479167	0.565217	0.486486	0.333333	0.527273	0.54902	0.26087	0.351351	0.6	0.438596	0.351852	0.548387	0.184615	0.27907	0.389474	0.314815	0.630769	0.47619	0.338235	0.2	0.227273	0.285714	0.5	0.923077	0.578947	0.857143	0.723404	0.533333	0.683333	0.428571	0.535714
12013975	Island	0.615385	0.508197	0.702703	0.594595	0.297297	0.666667	0.4375	0.833333	0.611111	0.56	0.352941	0.458333	0.163636	0.196721	0.106061	0.354167	0.0930233	0.307692	0.4375	0.414634	0.216216	0.333333	0.42	0.125	0.238095	0.235294	0.407407	0.3	0.34375	0.25	0.225	0.272727	0.18	0.52381	0.590909	0.318182	0.16	0.307692	0.24	0.321429	0.461538	0.470588	0.818182	0.568627	0.307692	0.517241	0.368421	0.37037
12013977	Island	0.918919	0.733333	0.861111	0.828571	0.675676	0.682927	0.4375	0.923077	0.684211	0.829787	0.78125	0.64	0.309091	0.446429	0.203125	0.75	0.348837	0.591837	0.541667	0.512195	0.457143	0.677419	0.612245	0.304348	0.45	0.352941	0.535714	0.52459	0.645161	0.492537	0.418605	0.545455	0.42	0.774194	0.590909	0.508197	0.48	0.653846	0.68	0.701754	1	0.666667	0.903226	0.918367	0.538462	0.79661	0.6	0.777778
12013979	Island	0.722222	0.578125	0.789474	0.636364	0.289474	0.615385	0.289474	0.714286	0.444444	0.534884	0.387097	0.5	0.163636	0.131148	0.0793651	0.435897	0.0681818	0.295455	0.510204	0.372093	0.138889	0.4	0.46	0.190476	0.288889	0.227273	0.322034	0.305085	0.357143	0.180556	0.275	0.296296	0.232558	0.533333	0.368421	0.34375	0.25	0.5	0.333333	0.314815	0.692308	0.588235	0.78125	0.566038	0.25	0.467742	0.263158	0.318182
12013981	Island	0.783784	0.698413	0.842105	0.757576	0.361111	0.756757	0.4	0.785714	0.611111	0.590909	0.636364	0.571429	0.333333	0.322034	0.166667	0.609756	0.113636	0.479167	0.634615	0.380952	0.235294	0.525424	0.612245	0.15	0.244444	0.55	0.481481	0.448276	0.482759	0.314286	0.307692	0.38961	0.318182	0.704918	0.473684	0.378788	0.319149	0.454545	0.478261	0.528302	0.692308	0.588235	0.851852	0.814815	0.5	0.693548	0.45	0.545455
12013983	Island	0.75	0.58	0.806452	0.7	0.393939	0.617647	0.439024	0.809524	0.5	0.578947	0.481481	0.538462	0.159091	0.186441	0.131148	0.657895	0.142857	0.391304	0.42	0.255814	0.321429	0.438596	0.435897	0.333333	0.116279	0.473684	0.318182	0.384615	0.666667	0.20339	0.25	0.273973	0.314286	0.508197	0.4	0.366667	0.205128	0.35	0.190476	0.25	0.833333	0.647059	0.875	0.75	0.277778	0.610169	0.333333	0.333333
12013985	Island	0.794118	0.608696	0.777778	0.733333	0.266667	0.633333	0.325	0.722222	0.636364	0.605263	0.392857	0.583333	0.186047	0.224138	0.122807	0.416667	0.111111	0.319149	0.520833	0.195122	0.192308	0.425926	0.390244	0.136364	0.075	0.421053	0.244444	0.346939	0.444444	0.20339	0.176471	0.197183	0.235294	0.440678	0.277778	0.313725	0.157895	0.3	0.380952	0.340909	0.714286	0.5625	0.727273	0.673913	0.105263	0.57377	0.388889	0.428571
12013987	Island	0.69697	0.477273	0.666667	0.555556	0.321429	0.5	0.282051	0.736842	0.55	0.457143	0.357143	0.521739	0.170732	0.203704	0.05	0.457143	0.121951	0.297872	0.456522	0.214286	0.296296	0.396226	0.44186	0.173913	0.111111	0.263158	0.186047	0.282609	0.346154	0.0701754	0.0645161	0.273973	0.142857	0.409836	0.352941	0.208333	0.2	0.1	0.105263	0.363636	0.714286	0.571429	0.470588	0.581395	0.166667	0.508197	0.235294	0.47619
12013989	Island	0.538462	0.351351	0.681818	0.5	0.166667	0.56	0.214286	0.631579	0.375	0.25	0.2	0.409091	0.0740741	0.0454545	0.0769231	0.212121	0	0.291667	0.285714	0.184211	0.272727	0.272727	0.333333	0.0588235	0.08	0.2	0.179487	0.136364	0.235294	0.125	0.142857	0.115942	0.190476	0.444444	0.142857	0.184211	0.0512821	0.214286	0.157895	0.225806	0.8	0.166667	0.1875	0.392857	0.25	0.333333	0.333333	0.357143
12106797	Shore	0.783784	0.78	0.8125	0.904762	0.714286	0.878788	0.821429	0.828571	0.44	0.510204	0.428571	0.578947	0.195122	0.54717	0.765957	0.693878	0.5	0.722222	0.651163	0.827586	0.541667	0.692308	0.755556	0.416667	0.375	0.653846	0.731707	0.74	0.395833	0.5	0.461538	0.588235	0.757576	0.72093	0.47619	0.576923	0.484848	0.6875	0.83871	0.5	0.809524	0.809524	0.759259	0.956522	0.772727	0.886076	0.857143	0.894737
12106799	Shore	0.733333	0.590164	0.816327	0.88	0.682927	0.897436	0.657143	0.772727	0.46875	0.453125	0.243902	0.545455	0.217391	0.508475	0.616667	0.647059	0.375	0.634146	0.692308	0.735294	0.733333	0.694915	0.737705	0.25	0.372549	0.5	0.58	0.643478	0.357143	0.372549	0.442308	0.5125	0.634146	0.622642	0.347826	0.615385	0.615385	0.47619	0.823529	0.83871	0.607143	0.68	0.822581	0.8125	0.75	0.776471	0.952381	0.625
12406155	Open Sea	0.55	0.931818	0.928571	0.533333	0.538462	0.515152	0.411765	0.72	0.263158	0.538462	0.4	0.757576	0.25	0.4	0.418605	0.525	0.423077	0.222222	0.470588	0.4375	0.413793	0.660714	0.3	0.545455	0.228571	0.346154	0.419355	0.396226	0.352941	0.193548	0.318182	0.197183	0.365854	0.229167	0.526316	0.16	0.185185	0.26087	0.307692	0.541667	0.782609	0.5625	0.56	0.348837	0.7	0.5	0.615385	0.666667
12550449	Open Sea	0.650602	0	0	0.589744	0	0.592105	0	0.015873	0	0.633588	0	0.0512821	0.910828	0.95	0.930233	0.963768	0.612245	0.616162	0.909091	0.962963	0.746032	0.948529	0.935484	0.0434783	0.584416	0.571429	0.92029	0.966887	0.56	0.0192308	0.607143	0.941406	0.96063	0.958974	0.621212	0.574713	0.683168	0.684211	0	0.757576	0.607143	0	0	0	0.582278	0.681529	0	0.761905
13064667	Open Sea	0.441176	0.710526	0.586207	0.785714	0.714286	0.805556	0.488372	0.782609	0.5	0.301887	0.291667	0.666667	0.488889	0.492063	0.613636	0.347826	0.4	0.425532	0.731707	0.368421	0.515152	0.533333	0.588235	0.545455	0.3	0.153846	0.72093	0.754386	0.595745	0.571429	0.25	0.512195	0.488889	0.791667	0.423077	0.770833	0.395833	0.6	0.888889	0.814815	0.964286	0.8125	0.823529	0.931034	0.689655	0.75	0.875	0.722222
13064675	Open Sea	0.228571	0.686567	0.59375	0.565217	0.642857	0.368421	0.44186	0.5	0.5	0.204545	0.229508	0.35	0.444444	0.372549	0.652174	0.24	0.162162	0.257143	0.534884	0.352941	0.375	0.313725	0.375	0.428571	0.170732	0.55	0.574468	0.460317	0.4375	0.394737	0.305556	0.31	0.355556	0.488372	0.294118	0.215686	0.266667	0.590909	0.758621	0.651163	0.916667	0.583333	0.904762	0.863636	0.565217	0.719298	0.636364	0.714286
14711675	Open Sea	0.521127	0.633333	0.592593	0.361702	0.45	0.469388	0.5	0.763636	0.552632	0.372881	0.326531	0.490566	0.5	0.469697	0.547945	0.272727	0.7	0.472727	0.586207	0.24	0.368421	0.64	0.26087	0.315789	0.357143	0.545455	0.431034	0.487805	0.44	0.460317	0.372549	0.382979	0.387097	0.688525	0.638889	0.539683	0.291667	0.458333	0.810811	0.897436	0.970588	0.857143	0.869565	0.883721	0.888889	0.797297	0.571429	0.833333
14711677	Open Sea	0.42029	0.61194	0.592593	0.311111	0.391304	0.45283	0.452055	0.6	0.447368	0.322581	0.230769	0.472727	0.44186	0.447368	0.407407	0.191176	0.537037	0.366197	0.474576	0.306667	0.340909	0.423077	0.217391	0.444444	0.306122	0.5	0.371429	0.37	0.384615	0.387097	0.339623	0.320755	0.328358	0.614286	0.459459	0.405063	0.22	0.458333	0.634146	0.73913	0.777778	0.6875	0.612245	0.804348	0.62069	0.75	0.761905	0.9
14711751	Open Sea	0.229167	0.296296	0.254902	0.148936	0.285714	0.333333	0.235294	0.418605	0.409091	0.105263	0.0735294	0.0882353	0.277778	0.264706	0.30137	0.0704225	0.137931	0.141176	0.230769	0.0447761	0.12	0.173077	0.0408163	0.176471	0.108108	0.285714	0.04	0.0549451	0.111111	0.183673	0.229167	0.157407	0.0888889	0.246377	0.233333	0.166667	0.0392157	0.285714	0.363636	0.373134	0.52	0.391304	0.589744	0.403226	0.413793	0.455696	0.424242	0.5
14711765	Open Sea	0.444444	0.588235	0.255319	0.463415	0.622222	0.586207	0.55	0.829268	0.705882	0.561404	0.372881	0.416667	0.268293	0.653846	0.5	0.388889	0.489362	0.469697	0.5	0.434783	0.692308	0.724138	0.521739	0.263158	0.413793	0.473684	0.461538	0.564516	0.428571	0.533333	0.526316	0.6	0.5	0.509091	0.36	0.553846	0.363636	0.333333	0.545455	0.75	0.777778	0.884615	0.871795	0.864865	0.761905	0.793651	0.857143	0.882353
15339093	Open Sea	0.21875	0.230769	0.607595	0.413043	0.575758	0.756098	0.5	0.402062	0.446809	0.28125	0.33945	0.234568	0.408696	0.273585	0.309524	0.191011	0.362069	0.410959	0.442623	0.352273	0.231884	0.418919	0.2375	0.235294	0.348485	0.46875	0.426667	0.533898	0.084507	0.307692	0.261538	0.317919	0.294118	0.350515	0.377778	0.354331	0.325	0.5	0.553191	0.525	0.6	0.588235	0.756757	0.440476	0.64	0.699029	0.560976	0.88
15339095	Open Sea	0.211268	0.244094	0.448718	0.4375	0.513158	0.787234	0.405797	0.357895	0.391304	0.210526	0.305556	0.232558	0.432203	0.305785	0.40625	0.163043	0.3	0.363636	0.215385	0.336957	0.157895	0.342857	0.259259	0.191489	0.386667	0.444444	0.435897	0.536585	0.0714286	0.278261	0.277778	0.323077	0.277778	0.378641	0.217391	0.379032	0.308642	0.473684	0.528302	0.615385	0.68	0.685185	0.666667	0.426966	0.631579	0.705882	0.625	0.866667
15715207	Open Sea	0.763636	0.764706	0.767857	0.666667	0.605634	0.705882	0.52	0.785714	0.488372	0.455696	0.460317	0.604167	0.363636	0.410959	0.375	0.326531	0.422222	0.177419	0.291667	0.354167	0.461538	0.368421	0.327869	0.230769	0.346939	0.176471	0.282051	0.401575	0.309091	0.102041	0.25641	0.149254	0.16	0.426667	0.177778	0.0543478	0.14	0.44	0.447368	0.0862069	0.62963	0.454545	0.272727	0.488372	0.363636	0.375	0.292683	0.52381
17232035	Open Sea	0.442308	0.933333	0.87037	0.424242	0.46	0.423729	0.326531	0.734694	0.243243	0.485714	0.415385	0.762712	0.2	0.466667	0.235294	0.380282	0.254237	0.367347	0.346154	0.354839	0.307692	0.425532	0.21875	0.173913	0.0714286	0.28	0.245902	0.27957	0.147059	0.163265	0.254545	0.150538	0.190476	0.344828	0.0789474	0.0588235	0.206897	0.333333	0.361111	0.42	0.676471	0.441176	0.412698	0.377049	0.425	0.386139	0.258065	0.666667
18669719	Open Sea	0.240741	0.316456	0.0948276	0.24359	0.4	0.363636	0.253521	0.206897	0.254545	0.194444	0.246914	0.148148	0.268293	0.324503	0.210084	0.198113	0.240741	0.178862	0.272727	0.175824	0.263158	0.166667	0.33945	0.288136	0.202899	0.177419	0.299145	0.190476	0.252874	0.198347	0.263636	0.164773	0.308642	0.366337	0.222222	0.3125	0.170455	0.307692	0.71875	0.597403	0.740741	0.617021	0.683544	0.641304	0.630137	0.591195	0.470588	0.533333
18702679	Open Sea	0.233333	0.317308	0.109091	0.405405	0.410959	0.246377	0.188679	0.188679	0.258065	0.284483	0.16129	0.138889	0.253165	0.320755	0.217949	0.179104	0.305085	0.213333	0.290909	0.111111	0.363636	0.278689	0.157895	0.09375	0.209677	0.272727	0.37931	0.464912	0.3	0.138889	0.28	0.209091	0.133333	0.0967742	0.48	0.247423	0.177419	0.0909091	0.466667	0.786885	0.722222	0.863636	0.444444	0.666667	0.866667	0.741007	0.826087	0.583333
18702683	Open Sea	0.218182	0.300971	0.147541	0.243243	0.338028	0.0821918	0.137255	0.132075	0.266667	0.132743	0.125	0.132353	0.142857	0.221154	0.173913	0.166667	0.280702	0.194805	0.210526	0.0909091	0.238095	0.225806	0.0933333	0.0882353	0.0983607	0.277778	0.390625	0.380952	0.132075	0.056338	0.0925926	0.153153	0.108108	0.0645161	0.4	0.0824742	0.107143	0.125	0.34375	0.596491	0.638889	0.790698	0.369863	0.6	0.733333	0.443609	0.608696	0.458333
18702685	Open Sea	0.224138	0.33	0.172414	0.333333	0.442857	0.134328	0.188679	0.177778	0.37037	0.259259	0.180328	0.181818	0.202899	0.212121	0.15942	0.142857	0.381818	0.219512	0.298246	0.107692	0.324324	0.264151	0.184615	0.125	0.224138	0.294118	0.466667	0.514563	0.208333	0.117647	0.111111	0.214953	0.126761	0.145455	0.434783	0.159574	0.163636	0.08	0.407407	0.781818	0.648649	0.842105	0.421875	0.597222	0.75	0.575	0.826087	0.625
18702687	Open Sea	0.25	0.276596	0.267857	0.387097	0.421875	0.16129	0.2	0.204545	0.37037	0.281553	0.192982	0.145161	0.190476	0.268817	0.197183	0.190476	0.358491	0.22973	0.303571	0.106061	0.394737	0.288462	0.206349	0.0666667	0.196429	0.352941	0.457627	0.510204	0.244444	0.117647	0.2	0.229358	0.147059	0.166667	0.5	0.159574	0.178571	0.047619	0.444444	0.851852	0.694444	0.916667	0.42623	0.652174	0.777778	0.642202	0.869565	0.772727
18702693	Open Sea	0.107143	0.272727	0.209302	0.269231	0.488889	0.217391	0.195652	0.25	0.533333	0.225	0.204082	0.236842	0.106383	0.236111	0.173077	0.190476	0.232558	0.212121	0.326531	0.117647	0.269231	0.347826	0.0740741	0.047619	0.138889	0.176471	0.44186	0.43662	0.27027	0.142857	0.183673	0.181818	0.12963	0.125	0.5	0.171429	0.225	0.0666667	0.3	0.769231	0.666667	0.884615	0.511111	0.660377	0.782609	0.6	0.8125	0.65
18702695	Open Sea	0.115385	0.321429	0.243243	0.304348	0.487805	0.15	0.170732	0.241379	0.5	0.173913	0.122449	0.135135	0.0238095	0.257576	0.170213	0.219512	0.205128	0.166667	0.347826	0.136364	0.333333	0.333333	0.08	0.166667	0.171429	0.133333	0.463415	0.515625	0.285714	0.125	0.26087	0.208333	0.108696	0.114286	0.428571	0.12069	0.15	0.0769231	0.470588	0.8	0.62963	0.772727	0.511111	0.66	0.6	0.565217	0.833333	0.625
18702697	Open Sea	0.25	0.326531	0.290323	0.333333	0.5	0.162162	0.210526	0.25	0.6	0.245902	0.214286	0.147059	0.0571429	0.351852	0.162791	0.210526	0.222222	0.25	0.325581	0.121951	0.3	0.289474	0.0681818	0.176471	0.15625	0.142857	0.527778	0.551724	0.266667	0.216216	0.209302	0.230769	0.166667	0.121212	0.384615	0.229167	0.166667	0.0909091	0.466667	0.833333	0.652174	0.888889	0.513514	0.714286	0.777778	0.586207	0.941176	0.733333
19091241	Open Sea	0.375	0.0704225	0.0188679	0.294118	0.470588	0.305556	0.428571	0.307692	0.5	0.485294	0.588235	0.377778	0.787879	0.512195	0.567568	0.361111	0.566667	0.410256	0.780488	0.625	0.608696	0.413793	0.647059	0.764706	0.8	0.73913	0.725	0.568182	0.741935	0.809524	0.607143	0.736842	0.697674	0.754386	0.666667	0.607143	0.456522	0.6875	0.5	0.6	0.448276	0.181818	0.666667	0.444444	0.727273	0.54902	0.5	0.615385
19152401	Open Sea	0.830986	0.52381	0.671429	0.666667	0.492537	0.895833	0.388889	0.9	0.69697	0.703704	0.686047	0.626506	0.4	0.424779	0.320388	0.22973	0.357143	0.443038	0.405797	0.376471	0.596491	0.553191	0.494382	0.342105	0.158537	0.184211	0.507692	0.388235	0.247423	0.197531	0.203704	0.22093	0.542857	0.198413	0.2	0.153846	0.26	0.5625	0.485294	0.24359	0.844828	0.375	0.412371	0.451923	0.533333	0.592	0.488889	0.5625
19152403	Open Sea	0.68	0.662791	0.861111	0.45614	0.5	0.77551	0.384615	0.893204	0.5	0.642202	0.615385	0.616279	0.333333	0.449153	0.188679	0.310811	0.305556	0.385542	0.319444	0.402299	0.491525	0.574468	0.522222	0.230769	0.0833333	0.307692	0.530303	0.340659	0.19	0.126437	0.148148	0.210227	0.457143	0.175573	0.205128	0.089172	0.259615	0.352941	0.294118	0.195402	0.830508	0.413043	0.416667	0.38835	0.655172	0.595588	0.466667	0.545455
20073159	Open Sea	0.423077	0.484375	0.516129	0.371429	0.193548	0.22449	0.387755	0.657895	0.518519	0.4	0.188679	0.245283	0.388889	0.214286	0.0930233	0.269231	0.133333	0.133333	0.190476	0.363636	0.421053	0.394737	0.147059	0.272727	0.0526316	0.4	0.470588	0.242857	0.0789474	0.179487	0.307692	0.5	0.177778	0.307692	0.277778	0.26	0.319149	0.25	0.785714	0.451613	0.611111	0.5	0.933333	0.574468	0.9	0.693878	0.823529	0.363636
20073163	Open Sea	0.4	0.46875	0.5	0.322581	0.111111	0.244898	0.306122	0.5	0.5	0.314815	0.166667	0.206897	0.289474	0.275	0.130435	0.214286	0.235294	0.157895	0.166667	0.305556	0.318182	0.390244	0.25	0.15625	0.0952381	0.266667	0.433333	0.27027	0.097561	0.131579	0.307692	0.484848	0.302326	0.3	0.263158	0.291667	0.333333	0.25	0.571429	0.472222	0.684211	0.588235	0.846154	0.469388	0.916667	0.75	0.941176	0.636364
20508907	Open Sea	0.30303	0.339623	0.333333	0.142857	0.254237	0.408163	0.184615	0.423729	0.16	0.271186	0.180556	0.191176	0.171429	0.207547	0.235294	0.188679	0.191489	0.2	0.368421	0.191489	0.230769	0.205128	0.125	0.375	0.155556	0.2	0.196078	0.244898	0.0212766	0.0612245	0.119048	0.0380952	0.169811	0.217391	0.171429	0.185185	0.131148	0.3125	0.5	0.611111	0.772727	0.605263	0.4	0.603175	0.52381	0.55	0.575758	0.409091
20508909	Open Sea	0.428571	0.469388	0.40625	0.255814	0.254545	0.472727	0.246377	0.40678	0.208333	0.25	0.257143	0.192982	0.16129	0.22	0.333333	0.217391	0.215686	0.211538	0.375	0.270833	0.305556	0.192308	0.225806	0.578947	0.156863	0.233333	0.23913	0.284211	0.133333	0.0930233	0.142857	0.0784314	0.276596	0.25	0.153846	0.25974	0.163934	0.1875	0.727273	0.837838	0.666667	0.567568	0.5	0.571429	0.666667	0.701299	0.735294	0.714286
20508911	Open Sea	0.484848	0.4	0.483871	0.3	0.306122	0.509804	0.230769	0.388889	0.304348	0.285714	0.257143	0.216667	0.133333	0.288462	0.368421	0.205128	0.1875	0.212766	0.34375	0.288889	0.333333	0.180556	0.133333	0.571429	0.125	0.206897	0.309524	0.247191	0.15	0.15	0.195122	0.0582524	0.2	0.181818	0.166667	0.2	0.172414	0.266667	0.631579	0.722222	0.75	0.567568	0.627907	0.596491	0.6	0.676923	0.677419	0.529412
21111795	Open Sea	0.730769	0.986301	0.96875	0.617284	0.708333	0.252874	0.578947	0.857143	0.568966	0.298077	0.589041	0.293103	0.276923	0.673469	0.324074	0.23913	0.3	0.714286	0.33871	0.769231	0.591837	0.471429	0.574074	0.452381	0.452055	0.131579	0.227273	0.421429	0.09	0.346154	0.130435	0.154412	0.164706	0.291262	0.5	0.224359	0.273973	0.277778	0.472973	0.434211	0.8	0.527778	0.566265	0.576923	0.555556	0.733333	0.75	0.605263
21459127	Open Sea	0.2	0.412371	0.232558	0.287879	0.306122	0.569892	0.198113	0.378947	0.404255	0.301887	0.287129	0.288288	0.252101	0.351145	0.262295	0.105769	0.343137	0.202247	0.246914	0.168539	0.285714	0.263158	0.309278	0.271186	0.370787	0.354167	0.313725	0.291667	0.233766	0.175824	0.227273	0.262857	0.184783	0.403101	0.166667	0.160839	0.153061	0.25	0.587302	0.47191	0.647059	0.619048	0.573034	0.569767	0.521739	0.56	0.6	0.677419
21914831	Open Sea	0.235294	0.266667	0.321429	0.606061	0.377358	0.407895	0.393443	0.490566	0.236842	0.303797	0.367647	0.30303	0.214286	0.391304	0.0181818	0.215385	0.147059	0.233333	0.479167	0.295455	0.44186	0.45283	0.238095	0.3	0.309524	0.137931	0.532258	0.408602	0.269231	0.15942	0.318182	0.382812	0.261905	0.28	0.108108	0.204082	0.263158	0.125	0.657143	0.471429	0.566667	0.575758	0.528302	0.712121	0.692308	0.628866	0.615385	0.470588
21914835	Open Sea	0.265625	0.352941	0.490909	0.6	0.480769	0.426471	0.3	0.509804	0.315789	0.269231	0.378788	0.213115	0.241379	0.373134	0.137255	0.169231	0.304348	0.254545	0.456522	0.222222	0.4	0.52	0.175	0.142857	0.195122	0.111111	0.483333	0.462366	0.254902	0.1875	0.44186	0.346154	0.463415	0.361111	0.3125	0.178947	0.27027	0.28	0.677419	0.560606	0.517241	0.65625	0.636364	0.765625	0.8	0.688889	0.52	0.6875
22051941	Island	0.603774	0.236842	0.378378	0.305556	0.352941	0.319149	0.457627	0.378378	0.428571	0.258621	0.174603	0.355556	0.514286	0.272727	0.433333	0.313433	0.0540541	0.214286	0.5	0.533333	0.538462	0.228571	0.333333	0.225806	0.290323	0.35	0.306122	0.323529	0.225	0.360656	0.512195	0.266055	0.275862	0.275862	0.318182	0.275862	0.322581	0.4375	0.933333	0.790698	0.952381	0.793103	0.965517	0.702128	0.935484	0.810811	0.761905	0.545455
22051943	Island	0.631579	0.487805	0.634146	0.459459	0.34375	0.36	0.305085	0.428571	0.34375	0.265625	0.289855	0.434783	0.611111	0.373134	0.444444	0.328767	0.131579	0.188406	0.54	0.508197	0.535714	0.25641	0.307692	0.264706	0.241379	0.263158	0.245283	0.364486	0.340426	0.416667	0.446809	0.241071	0.328358	0.466667	0.181818	0.333333	0.342857	0.277778	0.611111	0.88	0.869565	0.7	0.870968	0.673469	1	0.8	0.857143	0.705882
22051945	Island	0.529412	0.0888889	0.25	0.131579	0.206897	0.254902	0.237288	0.272727	0.257143	0.125	0.0746269	0.204545	0.361111	0.217391	0.377049	0.183099	0.0789474	0.134328	0.306122	0.2	0.357143	0.105263	0.226415	0.0285714	0.290323	0.3	0.134615	0.245283	0.108696	0.233333	0.24	0.147826	0.1875	0.266667	0.166667	0.145455	0.166667	0.352941	0.777778	0.72549	0.772727	0.6	0.766667	0.625	0.928571	0.696203	0.8	0.6875
22051947	Island	0.519231	0.355556	0.351351	0.228571	0.172414	0.481481	0.362069	0.285714	0.285714	0.225806	0.205882	0.204545	0.526316	0.212121	0.383333	0.257143	0.153846	0.151515	0.416667	0.254237	0.464286	0.138889	0.240741	0.151515	0.37931	0.277778	0.183673	0.235294	0.177778	0.293103	0.340426	0.175926	0.212121	0.2	0.28	0.166667	0.171429	0.266667	0.736842	0.803922	0.909091	0.617647	0.8125	0.673469	1	0.730769	0.857143	0.647059
22051949	Island	0.425926	0.177778	0.5	0.176471	0.107143	0.396226	0.327869	0.380952	0.342857	0.234375	0.214286	0.369565	0.578947	0.161765	0.383333	0.230769	0.1	0.166667	0.333333	0.283333	0.428571	0.0810811	0.263158	0.117647	0.266667	0.35	0.235294	0.207547	0.159091	0.350877	0.369565	0.190909	0.261538	0.193548	0.173913	0.163636	0.272727	0.285714	0.722222	0.803922	0.913043	0.705882	0.8	0.68	0.892857	0.810127	0.772727	0.647059
22051951	Island	0.241379	0.159091	0.195122	0.121951	0.193548	0.204082	0.278689	0.25	0.28125	0.105263	0.104478	0.0909091	0.384615	0.151899	0.173077	0.129032	0.0434783	0.09375	0.254545	0.150943	0.206897	0.025	0.196078	0.0277778	0.0967742	0.2	0.114754	0.161905	0.137255	0.0925926	0.215686	0.0990991	0.103448	0.275862	0.166667	0.132075	0.129032	0.357143	0.619048	0.698113	0.791667	0.657143	0.722222	0.612245	0.866667	0.595238	0.578947	0.484848
22051953	Island	0.383333	0.155556	0.0731707	0.119048	0.0967742	0.255319	0.274194	0.133333	0.166667	0.0677966	0.136364	0.113636	0.405405	0.164557	0.3	0.0952381	0.0238095	0.0793651	0.203704	0.166667	0.214286	0.0434783	0.14	0.0571429	0.15625	0.263158	0.177419	0.194175	0.117647	0.134615	0.22	0.0825688	0.0655738	0.290323	0.217391	0.12963	0.166667	0.230769	0.571429	0.647059	0.826087	0.588235	0.605263	0.530612	0.892857	0.621951	0.52381	0.424242
22051955	Island	0.206897	0.181818	0.184211	0.0526316	0.137931	0.136364	0.277778	0.166667	0.107143	0.125	0.132353	0.0888889	0.214286	0.141026	0.230769	0.126984	0.0222222	0.0333333	0.196078	0.0740741	0.25	0	0.106383	0.0606061	0.030303	0.208333	0.118644	0.141414	0.125	0.137255	0.111111	0.0707965	0.0833333	0.322581	0.136364	0.160714	0.206897	0.266667	0.5	0.622642	0.666667	0.483871	0.581395	0.510204	0.827586	0.466667	0.565217	0.314286
22051957	Island	0.385965	0.222222	0.315789	0.0512821	0.2	0.181818	0.3	0.177778	0.346154	0.25	0.208955	0.155556	0.428571	0.197368	0.283019	0.210526	0.12766	0.0909091	0.28	0.181818	0.24	0.0833333	0.148936	0	0.194444	0.291667	0.254237	0.263158	0.12766	0.142857	0.302326	0.0925926	0.225806	0.393939	0.181818	0.107143	0.2	0.466667	0.636364	0.627451	0.833333	0.566667	0.756098	0.653061	0.925926	0.783784	0.652174	0.382353
22051959	Island	0.454545	0.285714	0.525	0.102564	0.37931	0.372093	0.382979	0.243902	0.269231	0.314815	0.223881	0.355556	0.461538	0.223684	0.313725	0.280702	0.106383	0.134615	0.38	0.269231	0.481481	0.130435	0.191489	0.0344828	0.205882	0.291667	0.283333	0.230769	0.272727	0.326531	0.363636	0.180952	0.166667	0.454545	0.181818	0.218182	0.24	0.285714	0.7	0.84	0.956522	0.653846	0.875	0.619048	0.962963	0.788732	0.782609	0.617647
22051961	Island	0.326923	0.155556	0.325	0.157895	0.225806	0.181818	0.183673	0.205128	0.32	0.12	0.104478	0.162791	0.380952	0.2	0.254902	0.169492	0.0851064	0.150943	0.28	0.117647	0.25	0.133333	0.142857	0.037037	0.162162	0.24	0.25	0.120879	0.25	0.122449	0.288889	0.138889	0.0847458	0.424242	0.047619	0.109091	0.217391	0.285714	0.65	0.647059	0.666667	0.652174	0.666667	0.522727	0.857143	0.592105	0.636364	0.428571
22051963	Island	0.363636	0.155556	0.228571	0.0555556	0.192308	0.302326	0.111111	0.176471	0.263158	0.119048	0.09375	0.216216	0.409091	0.217391	0.08	0.157895	0.0227273	0.0555556	0.27907	0.145833	0.259259	0.0909091	0.142857	0.04	0.09375	0.318182	0.245283	0.166667	0.225	0.0638298	0.219512	0.0792079	0.109091	0.34375	0.0952381	0.188679	0.142857	0.2	0.473684	0.64	0.703704	0.545455	0.666667	0.512195	0.814815	0.541667	0.545455	0.5
22051965	Island	0.285714	0.0652174	0.195122	0.030303	0.178571	0.186047	0.294118	0.171429	0.190476	0.212766	0.0344828	0.131579	0.357143	0.171875	0.195652	0.230769	0.106383	0.0943396	0.261905	0.130435	0.25	0.119048	0.186047	0.047619	0.147059	0.25	0.156863	0.177778	0.151515	0.102041	0.27907	0.128713	0.115385	0.233333	0.1	0.160714	0.15	0.466667	0.684211	0.755556	0.76	0.666667	0.634146	0.512821	0.777778	0.695652	0.375	0.551724
22051967	Island	0.243902	0.244444	0.219512	0.176471	0.233333	0.205128	0.313725	0.151515	0.217391	0.150943	0.0588235	0.309524	0.435897	0.213115	0.208333	0.229167	0.125	0.1	0.333333	0.113636	0.25	0.142857	0.222222	0.0526316	0.210526	0.285714	0.244898	0.144444	0.185185	0.16	0.175	0.113402	0.160714	0.407407	0.1	0.12069	0.333333	0.3125	0.619048	0.809524	0.863636	0.555556	0.725	0.540541	0.821429	0.820896	0.647059	0.37037
22051969	Island	0.378378	0.238095	0.135135	0.185185	0.28	0.25	0.372549	0.290323	0.380952	0.156863	0.106383	0.452381	0.341463	0.15	0.22449	0.255814	0.142857	0.183673	0.425	0.111111	0.304348	0.146341	0.290323	0.111111	0.34375	0.26087	0.192308	0.215054	0.107143	0.306122	0.295455	0.0947368	0.183673	0.392857	0.0909091	0.186047	0.454545	0.333333	0.809524	0.871795	0.9	0.75	0.871795	0.611111	0.961538	0.890625	0.866667	0.545455
22051971	Island	0.451613	0.183673	0.2	0.0869565	0.2	0.214286	0.315789	0.289474	0.272727	0.163636	0.0961538	0.302326	0.243902	0.111111	0.304348	0.0930233	0.0487805	0.0769231	0.4	0.0952381	0.208333	0.121951	0.205882	0.0526316	0.275862	0.304348	0.156863	0.134831	0.107143	0.177778	0.244898	0.0967742	0.1875	0.310345	0.12	0.170732	0.296296	0.25	0.714286	0.763158	0.904762	0.75	0.829268	0.527778	0.863636	0.707692	0.714286	0.473684
22051973	Island	0.351351	0.0833333	0.128205	0.0666667	0.157895	0.219512	0.262295	0.25	0.26087	0.144928	0.0526316	0.181818	0.232558	0.106667	0.163265	0.108696	0.0930233	0.0740741	0.190476	0.0666667	0.185185	0.212766	0.230769	0.05	0.275	0.227273	0.155172	0.175926	0.121212	0.148936	0.178571	0.0204082	0.0727273	0.153846	0.142857	0.12963	0.285714	0.166667	0.653846	0.673913	0.76	0.619048	0.787234	0.673913	0.791667	0.637681	0.5	0.368421
22051975	Island	0.325581	0.12766	0.232558	0.0512821	0.195122	0.243902	0.308824	0.234043	0.307692	0.170732	0.0923077	0.283019	0.375	0.114943	0.157895	0.0892857	0.104167	0.105263	0.227273	0.137255	0.322581	0.145833	0.227273	0.0909091	0.297872	0.296296	0.245614	0.182692	0.0697674	0.142857	0.178571	0.109091	0.0677966	0.428571	0.0909091	0.164384	0.266667	0.176471	0.766667	0.765957	0.875	0.72	0.755102	0.644444	0.76	0.652778	0.625	0.636364
22051977	Island	0.369565	0.0784314	0.125	0.1	0.266667	0.3	0.273973	0.0869565	0.333333	0.209877	0.0714286	0.196429	0.380952	0.0804598	0.145161	0.0847458	0.117647	0.181818	0.2	0.0819672	0.3	0.133333	0.111111	0.0869565	0.270833	0.241379	0.16129	0.181818	0.136364	0.0892857	0.142857	0.0964912	0.0847458	0.25	0.147059	0.118421	0.2	0.176471	0.709677	0.688889	0.8	0.73913	0.723404	0.6875	0.84	0.671053	0.6875	0.416667
22051979	Island	0.224138	0.1875	0.185185	0.025	0.222222	0.212766	0.255814	0.157895	0.235294	0.159574	0.142857	0.225806	0.265306	0.16	0.186667	0.0921053	0.0980392	0.118644	0.14	0.0793651	0.230769	0.14	0.172414	0.12	0.26	0.258065	0.183099	0.192	0.0784314	0.111111	0.114754	0.110236	0.0857143	0.25	0.1	0.163043	0.309091	0.190476	0.757576	0.764706	0.851852	0.857143	0.754717	0.6	0.814815	0.686047	0.666667	0.333333
22051981	Island	0.296875	0.0933333	0.102941	0.0384615	0.140625	0.333333	0.25	0.0895522	0.114286	0.108108	0.108696	0.197183	0.245283	0.101852	0.116279	0.0561798	0.111111	0.0952381	0.237288	0.0454545	0.282051	0.189655	0.169014	0.0285714	0.125	0.28125	0.12987	0.134228	0.0754717	0.0909091	0.193548	0.124088	0.103896	0.176471	0.177778	0.161905	0.147541	0.227273	0.611111	0.648148	0.827586	0.857143	0.724138	0.6	0.724138	0.694737	0.625	0.4375
22051983	Island	0.358209	0.189873	0.179104	0.0943396	0.132353	0.357143	0.197917	0.136986	0.176471	0.135593	0.134831	0.315068	0.301887	0.192661	0.168539	0.129412	0.203704	0.112903	0.216667	0.114754	0.243902	0.20339	0.189189	0.212121	0.19697	0.314286	0.216216	0.193103	0.145455	0.153846	0.186441	0.138686	0.12987	0.21875	0.136364	0.236364	0.203125	0.227273	0.756757	0.775862	0.862069	0.9	0.762712	0.666667	0.833333	0.587629	0.684211	0.484848
22051985	Island	0.2	0.0638298	0.125	0.0153846	0.144737	0.0793651	0.115385	0.0568182	0.170213	0.116279	0.0192308	0.193182	0.126984	0.111111	0.0865385	0.0673077	0.0491803	0.0273973	0.194444	0.0769231	0.22449	0.140845	0.129412	0.114286	0.0405405	0.142857	0.129032	0.13125	0.0422535	0.0694444	0.0833333	0.0189873	0.126437	0.2	0.0212766	0.0813008	0.0684932	0.04	0.512195	0.532258	0.555556	0.666667	0.612903	0.575758	0.580645	0.490741	0.555556	0.382353
22051987	Island	0.253165	0.0510204	0.0853659	0.0597015	0.168831	0.265625	0.190909	0.125	0.145833	0.0530303	0.117117	0.204301	0.209677	0.105634	0.0642202	0.0619469	0.0277778	0.0675676	0.283784	0.0581395	0.307692	0.112676	0.125	0	0.131579	0.341463	0.136842	0.109091	0.0555556	0.0675676	0.123288	0.105882	0.10989	0.1875	0.0588235	0.135338	0.184211	0.222222	0.577778	0.68254	0.675676	0.774194	0.646154	0.657143	0.764706	0.533898	0.588235	0.361111
22051989	Island	0.273585	0.277311	0.198113	0.0967742	0.16	0.341176	0.282443	0.181818	0.218182	0.138554	0.165563	0.254098	0.320513	0.178571	0.147059	0.113333	0.126582	0.142857	0.304348	0.133333	0.290323	0.1875	0.144231	0.188679	0.21519	0.434783	0.137931	0.178744	0.134831	0.27551	0.155556	0.148515	0.175926	0.145455	0.153846	0.153846	0.287037	0.138889	0.732143	0.782609	0.854167	0.837838	0.792208	0.725275	0.790698	0.7	0.869565	0.409091
22051991	Island	0.234234	0.252101	0.218182	0.0888889	0.127451	0.25	0.286822	0.258621	0.196429	0.178571	0.216561	0.268293	0.4	0.179191	0.282609	0.125	0.121951	0.116505	0.293478	0.183486	0.25	0.244898	0.135922	0.175439	0.1125	0.425532	0.162393	0.216346	0.0326087	0.148936	0.177083	0.111628	0.25	0.157895	0.138889	0.164894	0.256881	0.277778	0.633333	0.706522	0.764706	0.853659	0.815789	0.731959	0.531915	0.753247	0.75	0.44186
22051993	Island	0.294643	0.210938	0.245614	0.0681818	0.242718	0.287129	0.270492	0.313559	0.290909	0.181287	0.134146	0.310924	0.404762	0.256983	0.295775	0.146341	0.101266	0.125	0.301075	0.157895	0.461538	0.214286	0.17757	0.180328	0.142857	0.318182	0.135593	0.212871	0.111111	0.25	0.154639	0.116279	0.223301	0.181818	0.148649	0.240437	0.284404	0.333333	0.728814	0.703297	0.679245	0.8	0.780488	0.704082	0.729167	0.668874	0.740741	0.410256
22051995	Island	0.238938	0.204724	0.239316	0.043956	0.163462	0.267327	0.165289	0.201681	0.2	0.132948	0.0787879	0.247934	0.252874	0.152542	0.178571	0.104294	0.0722892	0.0990099	0.301075	0.149123	0.21875	0.125	0.137615	0.0833333	0.126582	0.255814	0.145299	0.163366	0.10101	0.147368	0.122449	0.0599078	0.127451	0.0909091	0.125	0.180328	0.256881	0.138889	0.509091	0.640449	0.660377	0.871795	0.621951	0.670103	0.62	0.616438	0.666667	0.365854
22051997	Island	0.33913	0.296	0.289474	0.0659341	0.26	0.291262	0.25641	0.211864	0.153846	0.219101	0.0705128	0.201681	0.416667	0.270115	0.274809	0.145455	0.0722892	0.132653	0.336957	0.159292	0.393939	0.237113	0.132075	0.0806452	0.13253	0.309524	0.188034	0.168367	0.135922	0.193548	0.145833	0.113636	0.207921	0.196429	0.171429	0.247253	0.321429	0.222222	0.821429	0.777778	0.716981	0.823529	0.776316	0.628866	0.730769	0.77931	0.740741	0.534884
22051999	Island	0.336207	0.292683	0.434783	0.102273	0.232323	0.343137	0.355932	0.219298	0.315789	0.20904	0.130719	0.307692	0.395062	0.256098	0.290076	0.1375	0.16092	0.134615	0.351648	0.178571	0.268657	0.211111	0.163636	0.278689	0.135802	0.45	0.260504	0.196721	0.121495	0.202128	0.115789	0.159624	0.242991	0.193548	0.144928	0.232044	0.266055	0.212121	0.727273	0.755556	0.734694	0.852941	0.77027	0.714286	0.730769	0.722222	0.807692	0.55814
22052001	Island	0.293103	0.216	0.419643	0.0681818	0.302083	0.303922	0.282051	0.216216	0.25	0.157895	0.143791	0.230769	0.357143	0.280488	0.221374	0.0886076	0.116279	0.125	0.287356	0.155963	0.313433	0.146067	0.137615	0.135593	0.1125	0.282051	0.184874	0.0862069	0.125	0.170213	0.115789	0.0947867	0.196078	0.241935	0.176471	0.16185	0.302752	0.294118	0.754717	0.685393	0.673469	0.805556	0.76	0.719101	0.705882	0.683453	0.576923	0.463415
22052003	Island	0.219298	0.185484	0.300885	0.0337079	0.183673	0.215686	0.318584	0.185185	0.181818	0.146341	0.119205	0.186441	0.302326	0.23125	0.110236	0.0764331	0.0581395	0.142857	0.238636	0.138889	0.308824	0.181818	0.117117	0.166667	0.0909091	0.325	0.127119	0.0852273	0.0384615	0.107527	0.126316	0.055814	0.12381	0.15873	0.132353	0.127168	0.2	0.264706	0.607843	0.626374	0.6875	0.833333	0.716216	0.685393	0.627451	0.610294	0.6	0.4
22052005	Island	0.266055	0.203252	0.288288	0.0357143	0.164948	0.30303	0.297297	0.227723	0.142857	0.150943	0.128571	0.178571	0.337209	0.185897	0.247863	0.139241	0.0705882	0.127451	0.325843	0.141509	0.333333	0.179775	0.146789	0.186441	0.108108	0.25	0.228814	0.107955	0.122449	0.0786517	0.112245	0.127358	0.269231	0.21875	0.149254	0.176471	0.301887	0.352941	0.632653	0.724138	0.680851	0.972222	0.680556	0.659091	0.734694	0.639098	0.833333	0.365854
22052009	Island	0.0588235	0.0916667	0.102804	0	0.0689655	0.127451	0.105769	0.135417	0.0851064	0.0392157	0.0225564	0.106195	0.186047	0.0987654	0.0521739	0.0860927	0.0352941	0	0.126437	0.038835	0.148649	0.0786517	0.0363636	0.05	0.0136986	0.0285714	0.0689655	0.0357143	0.0114943	0.0352941	0.0515464	0.0380952	0.1	0.0793651	0.0144928	0.128834	0.0485437	0.0882353	0.367347	0.421687	0.446809	0.631579	0.376812	0.397727	0.395833	0.477612	0.565217	0.139535
22052011	Island	0.14	0.107438	0.142857	0	0.119048	0.192308	0.166667	0.212766	0.0212766	0.111842	0.0451128	0.154545	0.261905	0.0903226	0.198198	0.0738255	0.047619	0.0495049	0.151163	0.0490196	0.173333	0.103448	0.0925926	0.0333333	0.084507	0.0857143	0.0438596	0.0545455	0.0113636	0.0963855	0.0412371	0.0386473	0.132653	0.174603	0.0454545	0.123457	0.126214	0.129032	0.42	0.555556	0.622222	0.657895	0.529412	0.647727	0.608696	0.484615	0.772727	0.232558
22052013	Island	0.216867	0.205607	0.311828	0.0149254	0.202532	0.305263	0.233333	0.308642	0.254902	0.148148	0.0714286	0.204082	0.345679	0.126667	0.166667	0.137681	0.11236	0.0736842	0.256757	0.0990099	0.313433	0.183908	0.13	0.0892857	0.160714	0.176471	0.161905	0.0880503	0.0786517	0.113636	0.11828	0.055	0.215054	0.2	0.126984	0.154362	0.178218	0.0416667	0.630435	0.643836	0.697674	0.71875	0.569231	0.670588	0.636364	0.674603	0.73913	0.236842
22052015	Island	0.135802	0.188119	0.120879	0.0327869	0.0769231	0.236559	0.2	0.226667	0.16	0.126984	0.0655738	0.142857	0.294872	0.147887	0.205607	0.075188	0.091954	0.0210526	0.267606	0.107843	0.238806	0.166667	0.0842105	0.148148	0.0943396	0.16129	0.135922	0.0519481	0.0357143	0.149425	0.0666667	0.0625	0.144444	0.109091	0.147541	0.146853	0.282828	0.08	0.72093	0.690141	0.682927	0.676471	0.576271	0.679012	0.674419	0.669492	0.863636	0.405405
22052017	Island	0.25	0.387097	0.4375	0.0909091	0.277778	0.482759	0.3875	0.357143	0.543478	0.228346	0.19469	0.373494	0.425	0.316547	0.386792	0.203125	0.25	0.213483	0.42029	0.194175	0.360656	0.360465	0.150538	0.346154	0.118644	0.482759	0.368932	0.22069	0.175	0.313953	0.170455	0.16129	0.388235	0.32	0.178571	0.278195	0.397959	0.125	0.833333	0.84	0.852941	0.96875	0.701754	0.779221	0.840909	0.866071	0.826087	0.5
22052019	Island	0.3	0.474227	0.355263	0.218182	0.246154	0.416667	0.386667	0.372881	0.413043	0.260163	0.254717	0.32	0.355263	0.285714	0.40404	0.235294	0.171429	0.141304	0.428571	0.276596	0.333333	0.25	0.175824	0.320755	0.147541	0.321429	0.254902	0.226277	0.148148	0.259259	0.172043	0.141243	0.417722	0.313725	0.2	0.310606	0.383838	0.125	0.777778	0.859155	0.903226	0.933333	0.735849	0.753623	0.675	0.851485	0.826087	0.485714
22052021	Island	0.384615	0.5625	0.527027	0.170213	0.359375	0.439024	0.485714	0.377358	0.5	0.283333	0.386139	0.315789	0.416667	0.287879	0.41	0.252252	0.185714	0.204301	0.455882	0.308511	0.353846	0.308642	0.173913	0.361702	0.238095	0.535714	0.284314	0.21875	0.234568	0.384615	0.173913	0.177143	0.435897	0.442308	0.272727	0.396825	0.36	0.153846	0.857143	0.837838	0.758621	0.848485	0.811321	0.828571	0.769231	0.840426	0.916667	0.666667
22052023	Island	0.5	0.677083	0.5	0.232558	0.357143	0.486486	0.5	0.469388	0.512195	0.39823	0.395604	0.526316	0.452055	0.379845	0.463918	0.288288	0.378788	0.352273	0.567164	0.218391	0.474576	0.414286	0.235294	0.510638	0.290323	0.444444	0.460784	0.286885	0.228916	0.350649	0.204301	0.20122	0.44	0.454545	0.333333	0.373832	0.360465	0.4	0.827586	0.898551	0.83871	1	0.807692	0.777778	0.878788	0.965116	0.909091	0.62963
22052025	Island	0.283019	0.375	0.202703	0.0697674	0.207547	0.328767	0.28125	0.311111	0.184211	0.189655	0.267442	0.363636	0.310811	0.211864	0.344086	0.175926	0.166667	0.160494	0.338462	0.164706	0.285714	0.15873	0.105882	0.25	0.15	0.407407	0.264151	0.189189	0.142857	0.175	0.129032	0.128049	0.306667	0.333333	0.169811	0.212121	0.244186	0.208333	0.740741	0.728814	0.44	0.806452	0.78	0.666667	0.7	0.695122	0.666667	0.481481
22052027	Island	0.269231	0.255556	0.180556	0.0714286	0.211538	0.273973	0.387097	0.261905	0.184211	0.165217	0.154762	0.298507	0.328767	0.165289	0.308511	0.174312	0.0769231	0.141026	0.369231	0.141176	0.267857	0.166667	0.0705882	0.195652	0.180328	0.346154	0.2	0.194444	0.0897436	0.164557	0.147368	0.075	0.226667	0.266667	0.109091	0.22449	0.219512	0.115385	0.75	0.684211	0.64	0.757576	0.734694	0.728814	0.7	0.814815	0.65	0.576923
22052029	Island	0.339623	0.222222	0.208333	0.116279	0.22449	0.328767	0.42623	0.365854	0.394737	0.210526	0.216867	0.272727	0.285714	0.191667	0.410526	0.168224	0.138462	0.118421	0.384615	0.141176	0.245614	0.266667	0.164706	0.208333	0.174603	0.346154	0.272727	0.158879	0.168831	0.1875	0.107527	0.1125	0.266667	0.159091	0.218182	0.255102	0.292683	0.214286	0.666667	0.775862	0.64	0.878788	0.765957	0.775862	0.766667	0.888889	0.809524	0.5
22052031	Island	0.372549	0.260417	0.285714	0.097561	0.148936	0.246377	0.354839	0.394737	0.205128	0.154545	0.156627	0.306452	0.25974	0.235772	0.346939	0.216216	0.209677	0.135135	0.306452	0.116279	0.333333	0.216667	0.142857	0.25	0.138462	0.241379	0.2	0.0769231	0.148148	0.179487	0.153846	0.120253	0.25	0.333333	0.0980392	0.215054	0.21519	0.25	0.714286	0.631579	0.708333	0.916667	0.829787	0.759259	0.785714	0.772152	0.714286	0.48
22052033	Island	0.313725	0.326316	0.296875	0.025	0.0612245	0.253731	0.393443	0.323529	0.307692	0.189189	0.13253	0.184615	0.256757	0.237705	0.387097	0.190909	0.0983607	0.0571429	0.366667	0.209302	0.315789	0.131148	0.0581395	0.217391	0.217391	0.225806	0.27451	0.0990099	0.107143	0.189873	0.129032	0.1125	0.278481	0.146341	0.117647	0.236559	0.223684	0.214286	0.481481	0.660714	0.478261	0.805556	0.75	0.703704	0.730769	0.777778	0.681818	0.375
22052035	Island	0.319149	0.333333	0.258065	0.153846	0.14	0.264706	0.360656	0.361111	0.348837	0.198113	0.204819	0.322581	0.256757	0.196721	0.418367	0.153153	0.155172	0.112676	0.333333	0.209302	0.37931	0.216667	0.147727	0.1875	0.2	0.366667	0.25	0.166667	0.175	0.179487	0.173913	0.0774194	0.189873	0.157895	0.132075	0.263158	0.236842	0.153846	0.615385	0.769231	0.772727	0.911765	0.770833	0.86	0.807692	0.696203	0.714286	0.454545
22052037	Island	0.369565	0.282353	0.321429	0.0555556	0.222222	0.396825	0.482759	0.264706	0.348837	0.183486	0.263889	0.28125	0.391892	0.219298	0.414894	0.165049	0.245614	0.153846	0.338983	0.189873	0.362069	0.3	0.166667	0.302326	0.304348	0.428571	0.26	0.236559	0.24	0.253521	0.141176	0.144737	0.316456	0.315789	0.208333	0.263736	0.308642	0.0434783	0.72	0.76	0.736842	0.96875	0.833333	0.679245	0.84	0.92	0.666667	0.545455
22052039	Island	0.372093	0.373494	0.368421	0.0238095	0.244898	0.278689	0.45614	0.233333	0.317073	0.19	0.220588	0.354839	0.405405	0.220183	0.360825	0.182692	0.214286	0.142857	0.3	0.223684	0.381818	0.169492	0.134146	0.295455	0.246154	0.346154	0.247525	0.180851	0.166667	0.22973	0.180723	0.103448	0.184211	0.131579	0.191489	0.247191	0.197531	0.125	0.782609	0.8	0.5	0.916667	0.861111	0.705882	0.913043	0.85	0.631579	0.409091
22052041	Island	0.302326	0.3	0.358491	0.047619	0.2	0.3	0.351852	0.206897	0.097561	0.138298	0.294118	0.245902	0.253521	0.138889	0.322581	0.194175	0.0701754	0.111111	0.383333	0.0897436	0.272727	0.155172	0.1125	0.162791	0.0769231	0.407407	0.204082	0.135417	0.0985915	0.157143	0.125	0.0985915	0.184211	0.128205	0.170213	0.16092	0.219512	0.0833333	0.391304	0.625	0.5	0.694444	0.71875	0.591837	0.65	0.769231	0.578947	0.428571
22052043	Island	0.190476	0.307692	0.396226	0.047619	0.116279	0.275862	0.436364	0.1	0.125	0.141304	0.310811	0.262295	0.202899	0.121495	0.271739	0.10101	0.0535714	0.0634921	0.262295	0.12	0.290909	0.118644	0.0379747	0.205128	0.138462	0.384615	0.185567	0.159574	0.111111	0.179104	0.0506329	0.0431655	0.191781	0.210526	0.108696	0.130952	0.151899	0.08	0.590909	0.595745	0.5	0.833333	0.709677	0.470588	0.631579	0.792208	0.666667	0.454545
22052045	Island	0.225	0.21519	0.211538	0.0243902	0.133333	0.15625	0.333333	0.166667	0.0769231	0.11236	0.192308	0.177419	0.231884	0.100917	0.244681	0.107843	0.145455	0.0923077	0.298246	0.0704225	0.288462	0.112903	0.0410959	0.2	0.166667	0.4	0.19	0.114583	0.0882353	0.1875	0.0875	0.0791367	0.135135	0.0810811	0.0833333	0.204545	0.097561	0.04	0.52	0.627907	0.578947	0.685714	0.71875	0.576923	0.789474	0.683544	0.764706	0.333333
22052047	Island	0.292683	0.313253	0.375	0.121951	0.214286	0.257576	0.362069	0.323529	0.243243	0.21978	0.2625	0.254237	0.287879	0.205607	0.329545	0.207207	0.178571	0.176471	0.314815	0.117647	0.25	0.132353	0.128205	0.25641	0.166667	0.416667	0.29703	0.168317	0.121212	0.238806	0.109589	0.220588	0.211268	0.324324	0.156863	0.206897	0.160494	0.217391	0.653846	0.860465	0.526316	0.833333	0.657895	0.631579	0.9	0.826087	0.611111	0.391304
22052049	Island	0.292683	0.152941	0.382979	0.0487805	0.219512	0.179104	0.431034	0.361111	0.216216	0.164835	0.177215	0.224138	0.257143	0.17757	0.269663	0.171171	0.127273	0.0428571	0.314815	0.104478	0.322034	0.164179	0.142857	0.170732	0.15	0.44	0.268041	0.115385	0.0746269	0.147059	0.0909091	0.122302	0.239437	0.243243	0.0784314	0.177778	0.153846	0.08	0.5	0.75	0.5	0.810811	0.638889	0.553571	0.857143	0.747253	0.666667	0.318182
22052051	Island	0.302326	0.186047	0.288462	0.0425532	0.170732	0.246377	0.315789	0.225	0.2	0.142857	0.192308	0.258621	0.323944	0.121212	0.329545	0.159292	0.181818	0.0869565	0.37037	0.177419	0.254237	0.107692	0.131579	0.15	0.0869565	0.333333	0.183673	0.117647	0.130435	0.185714	0.150685	0.0985915	0.164179	0.117647	0.106383	0.223529	0.194805	0.173913	0.703704	0.568182	0.571429	0.705882	0.666667	0.516667	0.846154	0.677419	0.473684	0.55
22052053	Island	0.0930233	0.211111	0.538462	0.0408163	0.166667	0.183099	0.345455	0.3	0.25	0.139785	0.158537	0.175439	0.239437	0.208333	0.318182	0.151786	0.188679	0.0857143	0.345455	0.138462	0.172414	0.0952381	0.04	0.047619	0.126761	0.5	0.152174	0.16	0.0735294	0.169014	0.0675676	0.0774648	0.176471	0.117647	0.133333	0.193182	0.226667	0.04	0.555556	0.782609	0.44	0.8125	0.72973	0.435484	0.851852	0.72043	0.722222	0.428571
22052055	Island	0.166667	0.241379	0.436364	0	0.166667	0.205882	0.396552	0.342105	0.25	0.11828	0.220779	0.232143	0.246753	0.193548	0.352273	0.1875	0.125	0.140845	0.327273	0.115942	0.237288	0.176471	0.0833333	0.106383	0.179104	0.423077	0.16129	0.155556	0.0882353	0.171429	0.16	0.129252	0.176471	0.135135	0.130435	0.260417	0.133333	0.217391	0.615385	0.723404	0.583333	0.8125	0.717949	0.59375	0.892857	0.666667	0.473684	0.521739
22052057	Island	0.528302	0.481928	0.566038	0.133333	0.473684	0.319444	0.428571	0.540541	0.416667	0.195652	0.353659	0.46875	0.410959	0.324675	0.308642	0.373913	0.235294	0.220779	0.442308	0.324675	0.338983	0.426471	0.262295	0.297872	0.338462	0.565217	0.352273	0.365591	0.328947	0.377049	0.304348	0.310811	0.188406	0.35	0.32	0.446429	0.30303	0.272727	0.461538	0.97561	0.740741	0.868421	0.815789	0.859375	0.931034	0.84466	0.8125	0.809524
22052059	Island	0.431373	0.304348	0.421053	0.25	0.357143	0.364706	0.391304	0.405405	0.423077	0.164706	0.392405	0.306452	0.414286	0.329114	0.420455	0.32381	0.24	0.287671	0.4375	0.371429	0.461538	0.356164	0.15625	0.133333	0.2	0.538462	0.345238	0.26	0.208333	0.296875	0.355932	0.321918	0.466667	0.466667	0.347826	0.454545	0.228571	0.222222	0.518519	0.957447	0.740741	0.833333	0.809524	0.826087	0.935484	0.783019	0.6875	0.7
22052061	Island	0.482143	0.318841	0.482759	0.193548	0.45	0.367816	0.514286	0.475	0.5	0.125	0.397436	0.365079	0.410959	0.320513	0.433333	0.317308	0.372549	0.225352	0.489362	0.231884	0.4	0.380282	0.238806	0.355556	0.338983	0.666667	0.418605	0.357143	0.233766	0.4	0.327586	0.315789	0.393443	0.622642	0.348837	0.525862	0.337838	0.222222	0.75	0.9	0.777778	0.914286	0.809524	0.788732	0.875	0.821429	0.733333	0.789474
22052063	Island	0.639344	0.691176	0.619048	0.227273	0.571429	0.344828	0.589744	0.658537	0.552632	0.293478	0.566265	0.4	0.453333	0.366197	0.5	0.40404	0.358491	0.246575	0.586957	0.342857	0.545455	0.470588	0.362319	0.340426	0.362069	0.68	0.6	0.456311	0.355263	0.435484	0.435484	0.36478	0.464286	0.694915	0.4	0.495868	0.333333	0.285714	0.666667	0.96	0.814815	0.947368	0.955556	0.830986	0.9	0.844828	0.875	0.684211
22052065	Island	0.459016	0.376812	0.483871	0.166667	0.357143	0.317647	0.415584	0.511628	0.594595	0.136842	0.402439	0.393939	0.459459	0.315068	0.406977	0.381443	0.254545	0.148649	0.422222	0.26087	0.345455	0.3	0.205882	0.386364	0.22807	0.538462	0.428571	0.314286	0.236842	0.33871	0.355932	0.242038	0.322034	0.586207	0.377778	0.471074	0.28	0.130435	0.633333	0.875	0.8	0.972973	0.795918	0.739726	0.967742	0.791304	0.8125	0.705882
22052067	Island	0.66129	0.408451	0.639344	0.333333	0.595238	0.534884	0.615385	0.75	0.657895	0.358696	0.674419	0.535211	0.567568	0.540541	0.576471	0.42268	0.618182	0.394737	0.652174	0.535211	0.611111	0.485714	0.478873	0.488372	0.4	0.8	0.578313	0.537736	0.552632	0.633333	0.5	0.45	0.564516	0.719298	0.477273	0.642276	0.455696	0.391304	0.9	0.909091	0.769231	0.972973	0.938776	0.863014	1	0.862069	1	0.722222
22052069	Island	0.569444	0.369863	0.508197	0.3125	0.377778	0.406593	0.410256	0.565217	0.578947	0.22449	0.568421	0.414286	0.459459	0.452055	0.482353	0.340426	0.388889	0.256757	0.613636	0.319444	0.472727	0.424658	0.385714	0.422222	0.353846	0.6	0.525	0.364486	0.319444	0.424242	0.412698	0.36646	0.227273	0.704918	0.404762	0.507576	0.4625	0.136364	0.741935	0.921569	0.923077	0.894737	0.942308	0.802632	0.837838	0.886957	0.923077	0.684211
22052071	Island	0.717949	0.513158	0.661972	0.298507	0.5	0.540816	0.54878	0.689655	0.628571	0.376147	0.616071	0.578947	0.566265	0.5	0.586207	0.505051	0.467742	0.4625	0.627119	0.5	0.553846	0.506849	0.402597	0.565217	0.478261	0.68	0.52439	0.479339	0.540541	0.666667	0.619718	0.511364	0.478261	0.788732	0.391304	0.617021	0.505882	0.346154	0.783784	0.95	0.823529	0.916667	0.852459	0.897436	0.851064	0.895161	1	0.809524
22052073	Island	0.674699	0.679487	0.666667	0.338235	0.509434	0.407767	0.6	0.540984	0.684211	0.383178	0.504202	0.559524	0.517241	0.392405	0.577778	0.457944	0.439394	0.395062	0.609375	0.464286	0.623188	0.415584	0.379747	0.42	0.402778	0.740741	0.469136	0.468254	0.376623	0.5125	0.521739	0.494382	0.449275	0.61039	0.375	0.503497	0.5	0.296296	0.75	0.882353	0.90625	0.979592	0.78125	0.822785	0.844444	0.912698	0.6875	0.636364
22052075	Island	0.551724	0.325	0.363636	0.131579	0.403846	0.373737	0.531915	0.391304	0.487805	0.220183	0.244444	0.438202	0.341176	0.213483	0.333333	0.252252	0.208955	0.117647	0.391892	0.204545	0.375	0.228916	0.207317	0.22	0.233766	0.444444	0.263158	0.286822	0.134146	0.296703	0.242857	0.227979	0.236111	0.67033	0.18	0.27451	0.22093	0.333333	0.568182	0.816901	0.638889	0.807692	0.736111	0.666667	0.830189	0.746269	0.608696	0.666667
22052077	Island	0.5	0.382353	0.470588	0.298701	0.345455	0.481481	0.530973	0.418919	0.6875	0.264463	0.473282	0.436893	0.461538	0.460674	0.580952	0.4	0.35	0.263158	0.493976	0.315789	0.535714	0.461538	0.364706	0.392157	0.391304	0.695652	0.354167	0.424837	0.252874	0.415094	0.3875	0.369458	0.473684	0.747664	0.22449	0.426829	0.406593	0.432432	0.784314	0.860759	0.674419	0.890909	0.857143	0.776596	0.775862	0.825758	0.846154	0.571429
22052079	Island	0.714286	0.583333	0.72	0.531646	0.634921	0.649573	0.825	0.765432	0.618182	0.523438	0.619718	0.6	0.660377	0.563636	0.654867	0.569444	0.510204	0.475728	0.784946	0.790909	0.736842	0.543478	0.641509	0.603774	0.731183	0.709091	0.54717	0.625	0.444444	0.659091	0.737374	0.640351	0.639535	0.858333	0.436364	0.754286	0.783784	0.631579	0.962264	0.870588	0.826087	0.983871	0.876543	0.889908	0.95082	0.92029	0.794118	0.814815
22052081	Island	0.759615	0.65942	0.673077	0.506024	0.855072	0.652174	0.787402	0.781609	0.745763	0.605839	0.756579	0.713115	0.781513	0.6875	0.677686	0.624161	0.607843	0.577982	0.828283	0.761905	0.788462	0.652632	0.699115	0.666667	0.693069	0.807018	0.678899	0.730994	0.535714	0.795775	0.68	0.635193	0.715909	0.876923	0.72549	0.75	0.720339	0.595238	1	1	0.877551	0.9375	0.95122	0.917355	0.936508	0.95302	0.875	0.793103
22052083	Island	0.918919	0.852349	0.796117	0.851351	0.931507	0.897959	0.907563	0.932584	0.952381	0.839416	0.903226	0.883333	0.922481	0.83871	0.935484	0.847222	0.94	0.732759	0.979798	0.964286	0.894737	0.88764	0.86087	0.833333	0.873786	0.852459	0.892857	0.956284	0.705357	0.959184	0.911504	0.911017	0.939759	0.915385	0.773585	0.952381	0.907563	0.847826	0.964286	0.95283	1	0.983871	0.988372	0.968	0.955224	0.952381	0.958333	0.967742
22052085	Island	0.853448	0.880795	0.960396	0.7375	0.830986	0.734043	0.965517	0.797753	0.921875	0.784173	0.847134	0.837607	0.879032	0.785124	0.909091	0.816901	0.817308	0.747826	0.925234	0.910714	0.873874	0.8125	0.858407	0.732143	0.85	0.868852	0.764151	0.786517	0.75	0.914286	0.933962	0.80786	0.895349	0.937984	0.770833	0.891026	0.811966	0.822222	0.964286	0.969072	0.9	0.951613	0.97619	0.942149	1	0.972973	0.978723	0.891892
22052087	Island	0.869159	0.816327	0.977011	0.76	0.846154	0.747253	0.889908	0.891304	0.849057	0.776923	0.907285	0.900901	0.855932	0.840336	0.863248	0.771429	0.862745	0.792793	0.845455	0.896226	0.906542	0.815789	0.844037	0.816667	0.787234	0.904762	0.823529	0.836257	0.786408	0.915493	0.816327	0.813397	0.915663	0.956897	0.634615	0.917241	0.886957	0.869565	0.947368	0.947917	0.921569	0.919355	0.950617	0.915254	0.985294	0.971014	1	0.861111
22052089	Island	0.954545	0.943396	0.976471	0.881579	0.933333	0.902174	0.991228	0.968421	0.966102	0.888889	0.93617	0.941176	0.941176	0.888889	0.991379	0.907143	0.922414	0.946903	0.933962	0.951456	0.951456	0.9375	0.926606	0.966667	0.93617	1	0.926316	0.936782	0.950495	0.979592	0.978261	0.943925	0.965116	0.97541	0.849057	0.935252	0.945455	0.979167	1	0.989247	0.96	0.964912	0.945205	0.982301	0.984375	0.957447	0.964286	0.944444
22052091	Island	0.927273	0.943038	0.964286	0.866667	0.929577	0.976471	0.972973	1	0.964912	0.902439	0.930556	0.942149	0.951613	0.897638	0.983193	0.908451	0.911504	0.919643	0.943396	0.970297	0.960784	0.976471	0.972727	0.949153	0.913978	0.929577	0.946237	0.965714	0.93	0.932432	0.978947	0.927184	0.952941	0.97479	0.90566	0.95	0.915094	0.977778	0.928571	1	0.96	0.983051	0.958333	0.982301	1	0.986301	0.912281	0.891892
22052093	Island	0.913793	0.810458	0.939024	0.714286	0.849315	0.909091	0.887755	0.853933	0.892857	0.78626	0.865672	0.876106	0.938462	0.861314	0.903509	0.778626	0.914286	0.771186	0.960784	0.896226	0.910891	0.855556	0.854701	0.821429	0.781609	0.967213	0.880952	0.884146	0.813725	0.84106	0.860215	0.827586	0.988235	0.929204	0.777778	0.878378	0.882883	0.878049	0.90566	0.898876	0.886792	0.90566	0.968254	0.962963	0.942029	0.966667	0.932203	0.885714
22052095	Island	0.958333	0.838235	0.9125	0.797297	0.925373	0.842857	0.876404	0.903226	0.884615	0.84	0.868613	0.887931	0.962121	0.90604	0.940678	0.883333	0.961165	0.823009	0.989474	0.889831	0.917526	0.877778	0.930435	0.918367	0.952381	0.948276	0.941176	0.907407	0.797753	0.906475	0.886598	0.920398	1	0.981481	0.819672	0.925926	0.915094	0.97561	0.982456	0.947917	0.981481	0.965517	0.95082	0.966102	0.929412	0.937107	0.967742	0.947368
22052097	Island	0.951456	0.932836	0.907692	0.898734	0.971831	0.985075	0.967742	0.968421	0.952381	0.943548	0.95935	0.974576	0.991453	0.95122	0.936364	0.96	0.988372	0.971963	1	0.973913	0.960526	0.94	0.938596	1	0.909091	1	0.978261	0.932432	0.939759	0.935714	0.97	0.989362	0.987654	0.981132	0.920635	0.981013	0.916667	0.921053	0.939394	0.967033	0.98	1	0.927536	0.979167	1	0.980519	0.921875	1
22052099	Island	0.952941	0.794872	0.962963	0.84058	0.84	0.952381	0.917647	0.976744	0.871795	0.869565	0.933333	0.943925	0.962617	0.918367	0.92	0.920455	0.931507	0.870588	0.954545	0.93	0.970149	0.966667	0.925234	0.862745	0.869565	0.93617	0.928571	0.952381	0.943662	0.943548	0.877778	0.895706	0.959459	0.936842	0.925926	0.901316	0.934066	0.941176	0.967213	0.938272	0.958333	0.934783	1	0.964286	0.963415	1	0.931034	0.970588
22052101	Island	0.977011	0.92437	0.981818	0.957143	1	1	0.988095	1	0.975	0.9375	0.95283	0.980769	0.990909	0.986207	0.989691	0.949367	0.985507	0.988372	0.951613	0.990476	0.971429	0.978947	0.981308	0.980392	1	1	0.964286	0.975207	0.954545	0.97619	0.988764	0.987342	0.944444	0.989583	1	0.973856	0.977528	0.939394	0.969231	0.987952	1	0.934783	1	1	0.988095	1	1	0.971429
22052103	Island	0.964286	0.971154	0.923077	1	0.984127	0.95082	0.975	1	0.971429	0.951923	0.990566	0.980198	1	0.972222	1	0.987805	0.966102	0.986842	1	0.980769	0.971014	1	1	1	0.984127	1	1	0.973684	0.966667	0.991071	0.965909	0.966443	0.957746	1	0.955556	0.97931	0.957447	1	1	0.986486	0.977778	0.97619	1	1	1	0.983871	0.960784	0.969697
22052105	Island	0.975904	0.969388	1	0.983051	0.983607	1	0.935897	0.985915	0.918919	0.94	1	1	1	0.985714	0.989011	0.974359	0.983333	0.987342	0.983607	0.980952	0.956522	1	0.96875	1	0.983871	1	0.945946	0.982301	0.982759	0.971963	1	0.986111	0.957746	1	0.958333	0.972973	0.93617	1	1	0.986486	1	1	0.962264	0.986842	0.986842	1	0.980769	0.941176
22052107	Island	0.973684	0.978261	0.933333	0.981481	0.984127	0.960784	0.96	0.911765	0.971429	0.967742	0.98913	0.945652	0.969697	0.992701	0.9	0.972222	0.868852	0.909091	0.983333	0.919192	0.913043	0.97561	0.978723	0.975	0.965517	0.925	0.921053	0.963303	0.903846	0.96	0.961039	0.944056	0.939394	0.963415	0.9375	0.957143	0.935484	1	0.967742	0.947368	1	0.878049	0.947368	1	0.984848	0.972727	0.934783	0.971429
22052109	Island	0.986486	0.957447	0.914894	0.913043	1	0.915254	0.964286	0.953125	1	1	0.963855	0.988636	0.959596	0.984252	0.978495	1	0.938462	0.971014	0.966667	0.979592	0.929577	1	0.923913	0.97561	1	0.973684	0.97619	0.98	0.890909	0.977778	0.975	0.958621	0.953846	0.953488	1	0.991935	0.955056	0.90625	1	0.962025	0.972973	0.972973	0.966102	0.97561	0.983333	0.982609	0.962264	0.970588
22052111	Island	0.9375	0.989011	0.913043	1	1	0.934426	0.891566	0.953125	0.882353	0.973684	0.959459	0.934783	0.955556	0.96875	0.935484	0.984615	0.933333	0.938462	0.981481	0.989011	0.969697	0.959459	0.932584	0.95	0.979592	0.972973	0.941176	0.941748	0.886792	0.941176	0.986667	0.923611	0.90625	0.987342	0.958333	0.973684	0.931818	0.933333	0.94	0.947368	0.972222	1	0.965517	0.962025	0.946429	0.963636	0.980392	0.928571
22633755	Island	0.681818	0.426087	0.642857	0.686567	0.666667	1	0.77907	0.921875	0.433962	0.485437	0.607595	0.555556	0.754098	0.6	0.653333	0.610169	0.356164	0.460317	0.782609	0.460317	0.611111	0.703125	0.542373	0.605263	0.310345	0.416667	0.602564	0.638889	0.4375	0.530303	0.767857	0.316129	0.375	0.6	0.666667	0.573529	0.386667	0.384615	0.756757	0.78125	0.931034	0.896552	0.78	0.946667	0.775	0.893805	0.925926	0.892857
22633757	Island	0.757576	0.452991	0.638554	0.741379	0.607843	0.977273	0.806818	0.919355	0.416667	0.471154	0.532468	0.525641	0.645161	0.593023	0.635135	0.555556	0.457143	0.421875	0.761905	0.365079	0.736842	0.645161	0.583333	0.583333	0.224138	0.513514	0.534247	0.646465	0.428571	0.516129	0.72	0.346405	0.38961	0.549296	0.681818	0.617647	0.324675	0.307692	0.783784	0.790323	0.928571	0.758621	0.77551	0.917808	0.775	0.932692	0.892857	0.96
22633759	Island	0.8125	0.578947	0.701299	0.79661	0.755102	1	0.911111	0.947368	0.659574	0.574257	0.675325	0.632911	0.758065	0.662791	0.726027	0.688525	0.521127	0.569231	0.790698	0.655738	0.777778	0.741935	0.655172	0.638889	0.45614	0.583333	0.571429	0.747368	0.630769	0.580645	0.745098	0.435374	0.432432	0.676056	0.727273	0.666667	0.453333	0.481481	0.805556	0.810345	0.884615	0.884615	0.916667	0.933333	0.85	0.951456	0.892857	1
22633761	Island	0.758065	0.504673	0.727273	0.711864	0.530612	1	0.823529	0.927273	0.375	0.378947	0.589041	0.545455	0.557377	0.535714	0.657534	0.508772	0.39726	0.5	0.658537	0.533333	0.666667	0.716667	0.526316	0.555556	0.298246	0.470588	0.485294	0.65625	0.451613	0.453125	0.74	0.346939	0.361111	0.575342	0.7	0.651515	0.408451	0.321429	0.764706	0.766667	0.923077	0.807692	0.723404	0.84507	0.702703	0.85	0.923077	0.952381
22633763	Island	0.733333	0.460784	0.565789	0.698113	0.489362	0.833333	0.752941	0.942308	0.361702	0.347368	0.5	0.52	0.517241	0.551282	0.558824	0.462963	0.333333	0.387097	0.805556	0.476923	0.352941	0.6	0.52	0.636364	0.22	0.382353	0.415385	0.636364	0.375	0.354839	0.596154	0.239437	0.242857	0.534247	0.526316	0.523077	0.338235	0.285714	0.71875	0.75	0.833333	0.695652	0.75	0.808824	0.617647	0.893617	0.925926	0.9
22633765	Island	0.672414	0.533981	0.536585	0.735849	0.553191	0.90625	0.831169	0.980392	0.571429	0.476744	0.533333	0.680556	0.592593	0.486486	0.57377	0.458333	0.4	0.448276	0.764706	0.566667	0.5	0.631579	0.541667	0.78125	0.3125	0.378378	0.484848	0.626374	0.46875	0.428571	0.734694	0.321429	0.380952	0.591549	0.631579	0.586207	0.394366	0.208333	0.83871	0.77193	0.952381	0.727273	0.818182	0.921875	0.764706	0.839506	0.964286	0.789474
22633767	Island	0.618182	0.588235	0.45679	0.705882	0.5	0.9375	0.782051	0.886792	0.547619	0.380952	0.566667	0.444444	0.482143	0.445946	0.508475	0.387755	0.311475	0.389831	0.685714	0.472727	0.4	0.442308	0.458333	0.727273	0.22	0.297297	0.4375	0.56044	0.359375	0.362069	0.62	0.301471	0.3125	0.5	0.631579	0.491525	0.366197	0.25	0.741935	0.745763	0.9	0.708333	0.695652	0.904762	0.617647	0.797297	0.896552	0.789474
22633769	Island	0.603448	0.495146	0.455696	0.647059	0.422222	0.90625	0.815789	0.851852	0.390244	0.3375	0.568966	0.485714	0.372549	0.391304	0.466667	0.229167	0.213115	0.25	0.6	0.46	0.25	0.415094	0.326087	0.636364	0.145833	0.263158	0.40625	0.466667	0.278689	0.305085	0.72	0.295455	0.118644	0.460317	0.631579	0.416667	0.333333	0.347826	0.709677	0.689655	0.9	0.521739	0.659091	0.861538	0.666667	0.816901	0.892857	0.842105
22633771	Island	0.62963	0.445545	0.538462	0.653061	0.651163	0.9	0.887097	0.86	0.545455	0.432099	0.517241	0.5	0.529412	0.514286	0.568966	0.36	0.275862	0.316667	0.6	0.530612	0.6	0.568627	0.5	0.6	0.192308	0.333333	0.383333	0.505618	0.40625	0.381818	0.64	0.265625	0.245614	0.5	0.666667	0.491228	0.347222	0.409091	0.733333	0.666667	0.875	0.666667	0.75	0.915254	0.647059	0.794118	0.92	0.842105
22633773	Island	0.5	0.425743	0.426471	0.612245	0.340426	0.78125	0.7	0.818182	0.361111	0.269231	0.285714	0.306452	0.326087	0.292308	0.5	0.254902	0.236364	0.254902	0.675676	0.361702	0.368421	0.285714	0.386364	0.47619	0.111111	0.257143	0.45	0.364706	0.36	0.24	0.522727	0.147541	0.142857	0.440678	0.5625	0.465517	0.216667	0.238095	0.695652	0.641509	0.954545	0.611111	0.666667	0.847458	0.516129	0.714286	0.846154	0.823529
22633775	Island	0.54717	0.373737	0.313433	0.647059	0.4375	0.866667	0.775862	0.790698	0.4	0.341772	0.425532	0.42623	0.478261	0.323529	0.526316	0.288462	0.272727	0.265306	0.589744	0.408163	0.473684	0.367347	0.463415	0.5	0.150943	0.264706	0.467742	0.4	0.36	0.294118	0.568182	0.172414	0.206897	0.516667	0.625	0.466667	0.288136	0.272727	0.652174	0.673469	0.913043	0.764706	0.642857	0.842105	0.580645	0.809524	0.961538	0.8125
22633779	Island	0.621622	0.192308	0.207547	0.12963	0.190476	0.264706	0.341463	0.382353	0.266667	0.2	0.324324	0.344828	0.2	0.290909	0.438596	0.215686	0.166667	0.190476	0.307692	0.125	0.28	0.157895	0	0.130435	0.222222	0.272727	0.333333	0.21519	0.111111	0.211538	0.552632	0.217822	0.0833333	0.352941	0.533333	0.319149	0.104167	0.222222	0.1875	0.538462	0.809524	0.4375	0.560976	0.76087	0.461538	0.634921	0.466667	1
22633781	Island	0.527778	0.25641	0.26087	0.530612	0.382979	0.8	0.722222	0.827586	0.178571	0.173913	0.25	0.333333	0.186047	0.22807	0.42	0.245283	0.159091	0.181818	0.46875	0.352941	0.269231	0.277778	0.485714	0.454545	0.238095	0.222222	0.350877	0.213333	0.25641	0.170213	0.6	0.234694	0.0681818	0.408163	0.555556	0.347826	0.0909091	0.25	0.705882	0.5	0.8	0.444444	0.575	0.784314	0.5	0.734375	0.823529	1
22633783	Island	0.527778	0.351351	0.340909	0.468085	0.386364	0.74359	0.684211	0.83871	0.181818	0.185714	0.393939	0.339623	0.234043	0.235294	0.347826	0.234043	0.162791	0.173913	0.612903	0.340426	0.285714	0.324324	0.542857	0.5	0.261905	0.235294	0.366667	0.227848	0.232558	0.235294	0.608696	0.236559	0.0888889	0.428571	0.578947	0.318182	0.05	0.3	0.647059	0.55	0.727273	0.529412	0.567568	0.843137	0.5	0.78125	0.789474	0.9
22633805	Island	0.419355	0.278351	0.325	0.40678	0.42	0.674419	0.588235	0.818182	0.162162	0.194444	0.425532	0.313725	0.352941	0.283582	0.3	0.254902	0.258621	0.205882	0.512821	0.310345	0.228571	0.413043	0.470588	0.384615	0.294118	0.5625	0.391892	0.227273	0.241379	0.288889	0.607843	0.193277	0.145833	0.533333	0.409091	0.326087	0.245283	0.366667	0.8	0.557692	0.807692	0.454545	0.666667	0.859649	0.727273	0.76	0.761905	1
22633807	Island	0.42623	0.347368	0.205128	0.416667	0.4	0.74359	0.509804	0.822222	0.205128	0.162162	0.454545	0.375	0.354167	0.296875	0.272727	0.254902	0.267857	0.171429	0.452381	0.35	0.222222	0.456522	0.588235	0.375	0.333333	0.529412	0.391892	0.252874	0.241379	0.3125	0.574468	0.237288	0.2	0.555556	0.5	0.326087	0.230769	0.258065	0.72	0.566038	0.851852	0.36	0.625	0.857143	0.666667	0.779221	0.863636	1
22633809	Island	0.40625	0.247619	0.162791	0.423729	0.42	0.828571	0.6	0.807692	0.0930233	0.207792	0.36	0.267857	0.346154	0.305556	0.25	0.220339	0.222222	0.2	0.340426	0.362069	0.317073	0.42	0.457143	0.28	0.311111	0.521739	0.368421	0.237113	0.289855	0.45283	0.537037	0.186047	0.192308	0.580645	0.40625	0.347826	0.267857	0.235294	0.666667	0.56	0.83871	0.366667	0.638298	0.810345	0.555556	0.701299	0.952381	0.8
22633811	Island	0.507042	0.363636	0.324324	0.431034	0.44186	0.818182	0.66129	0.844828	0.289474	0.2375	0.479167	0.270833	0.4	0.32	0.322581	0.254237	0.22807	0.259259	0.442308	0.393443	0.348837	0.568627	0.575	0.34375	0.230769	0.535714	0.392405	0.364486	0.206349	0.416667	0.508197	0.217054	0.241935	0.540541	0.451613	0.340426	0.192982	0.28125	0.741935	0.654545	0.875	0.35	0.603448	0.892308	0.692308	0.797468	0.88	0.909091
22633813	Island	0.457143	0.336842	0.305556	0.368421	0.479167	0.566667	0.66129	0.8	0.189189	0.231707	0.444444	0.24	0.423077	0.266667	0.28125	0.222222	0.22807	0.2625	0.396226	0.4	0.439024	0.46	0.575	0.264706	0.307692	0.551724	0.382716	0.352941	0.193548	0.40678	0.516667	0.185484	0.213115	0.545455	0.441176	0.326531	0.2	0.277778	0.75	0.631579	0.861111	0.333333	0.540984	0.852941	0.710526	0.790123	0.875	0.916667
22633815	Island	0.463768	0.301075	0.2	0.413793	0.510204	0.676471	0.661538	0.836066	0.277778	0.231707	0.416667	0.25	0.428571	0.298701	0.338235	0.160714	0.209677	0.240964	0.413793	0.30303	0.414634	0.42	0.55	0.314286	0.285714	0.533333	0.407895	0.342857	0.214286	0.446429	0.53125	0.2	0.258621	0.589041	0.382353	0.28	0.175439	0.171429	0.677419	0.672727	0.8	0.3	0.5	0.776316	0.675676	0.783133	0.869565	0.909091
22633817	Island	0.467742	0.274725	0.227273	0.423729	0.568627	0.793103	0.65625	0.758621	0.342105	0.22093	0.395833	0.244898	0.418605	0.345238	0.34375	0.189655	0.203125	0.277778	0.424242	0.295775	0.47619	0.44	0.55	0.382353	0.372549	0.483871	0.4	0.365385	0.208333	0.410714	0.5	0.193548	0.213115	0.532468	0.294118	0.384615	0.2	0.2	0.655172	0.672727	0.756757	0.297297	0.52459	0.776316	0.694444	0.719101	0.65	0.714286
22633819	Island	0.440678	0.276596	0.204545	0.423729	0.56	0.793103	0.638889	0.824561	0.394737	0.238636	0.4	0.196078	0.454545	0.359551	0.354839	0.262295	0.196721	0.222222	0.38806	0.294118	0.475	0.48	0.586957	0.294118	0.320755	0.451613	0.417722	0.373737	0.256757	0.368421	0.539683	0.171875	0.253968	0.573333	0.325	0.396226	0.206897	0.151515	0.617647	0.641509	0.810811	0.25641	0.515625	0.866667	0.705882	0.723404	0.736842	0.555556
22633821	Island	0.418182	0.307692	0.214286	0.362069	0.510638	0.615385	0.647059	0.694915	0.425	0.197674	0.347826	0.148148	0.372093	0.340659	0.344828	0.222222	0.192982	0.294118	0.362319	0.28169	0.413043	0.470588	0.586957	0.393939	0.254237	0.533333	0.366667	0.365591	0.222222	0.403226	0.444444	0.155556	0.262295	0.472222	0.315789	0.310345	0.210526	0.0571429	0.694444	0.510638	0.756757	0.3	0.441176	0.792208	0.722222	0.663158	0.722222	0.388889
22633823	Island	0.421053	0.303371	0.285714	0.383333	0.6	0.730769	0.656716	0.793103	0.421053	0.232558	0.318182	0.178571	0.404762	0.355556	0.333333	0.190476	0.203704	0.296296	0.447761	0.342857	0.404255	0.490566	0.645833	0.428571	0.368421	0.533333	0.362637	0.417582	0.285714	0.396825	0.5	0.126866	0.275862	0.493151	0.416667	0.333333	0.218182	0.171429	0.594595	0.608696	0.777778	0.275	0.463768	0.844156	0.588235	0.71875	0.833333	0.470588
22633825	Island	0.462963	0.379747	0.3	0.472727	0.666667	0.782609	0.730159	0.830508	0.424242	0.25641	0.358974	0.2	0.475	0.376471	0.381818	0.254237	0.25	0.328947	0.430769	0.343284	0.439024	0.52	0.652174	0.4	0.339286	0.612903	0.426829	0.410526	0.296875	0.435484	0.515625	0.166667	0.305085	0.5	0.363636	0.35	0.210526	0.121212	0.571429	0.641026	0.806452	0.333333	0.544118	0.884058	0.722222	0.778947	0.888889	0.555556
22633827	Island	0.433962	0.337662	0.25641	0.350877	0.681818	0.782609	0.745763	0.842105	0.393939	0.246753	0.297297	0.280702	0.435897	0.376471	0.388889	0.280702	0.2	0.315068	0.4375	0.307692	0.461538	0.489796	0.627907	0.448276	0.333333	0.612903	0.4125	0.428571	0.283333	0.466667	0.491803	0.160714	0.220339	0.454545	0.393939	0.327273	0.218182	0.181818	0.685714	0.694444	0.8125	0.282051	0.5	0.882353	0.771429	0.802198	0.842105	0.5
22633829	Island	0.428571	0.349206	0.235294	0.36	0.625	0.764706	0.6	0.804348	0.461538	0.190476	0.266667	0.3	0.388889	0.342857	0.295455	0.3125	0.183673	0.301587	0.54902	0.25	0.473684	0.4	0.666667	0.428571	0.25	0.565217	0.338462	0.373134	0.26087	0.423077	0.509804	0.148515	0.1875	0.396226	0.333333	0.382979	0.26087	0.176471	0.548387	0.73913	0.631579	0.366667	0.396552	0.763636	0.545455	0.722222	0.818182	0.444444
22633831	Island	0.4375	0.166667	0.176471	0.346939	0.580645	0.941176	0.659574	0.8	0.5	0.237288	0.259259	0.289474	0.333333	0.313433	0.222222	0.288889	0.266667	0.3	0.489362	0.269231	0.432432	0.377778	0.636364	0.37037	0.325581	0.391304	0.3	0.359375	0.244444	0.326923	0.521739	0.151515	0.217391	0.415094	0.37037	0.363636	0.255814	0.1875	0.645161	0.727273	0.666667	0.310345	0.345455	0.788462	0.5	0.656716	0.727273	0.388889
22852601	Open Sea	0.326923	0.298701	0.389831	0.323944	0.369048	0.140625	0.25	0.235294	0.184615	0.319018	0.173228	0.431818	0.119718	0.292208	0.37766	0.243243	0.211864	0.185484	0.195804	0.229008	0.195652	0.217742	0.267606	0.240964	0.12963	0.195122	0.297101	0.301508	0.213115	0.111111	0.22314	0.256303	0.19685	0.295597	0.25	0.0637255	0.284553	0.297297	0.536585	0.471545	0.638889	0.68	0.538462	0.68	0.711864	0.745665	0.647887	0.390244
22861927	Open Sea	0.612245	0.615385	0.763158	0.52	0.434783	0.794872	0.483333	0.865385	0.361111	0.57971	0.732394	0.510638	0.62963	0.590909	0.596154	0.36	0.304348	0.444444	0.392157	0.404762	0.454545	0.545455	0.395833	0.232558	0.452381	0.409091	0.298246	0.385542	0.28	0.289474	0.55814	0.355263	0.386364	0.513889	0.125	0.282353	0.297872	0.3125	0.358974	0.527273	0.851852	0.764706	0.596491	0.617021	0.581395	0.617021	0.727273	0.653846
22861931	Open Sea	0.76087	0.877551	0.967742	0.590909	0.466667	0.866667	0.571429	0.868421	0.342105	0.711864	0.857143	0.666667	0.653846	0.555556	0.66	0.581395	0.358974	0.411765	0.5	0.394737	0.666667	0.603774	0.5	0.575758	0.615385	0.210526	0.431818	0.492063	0.511628	0.59375	0.357143	0.442857	0.428571	0.45	0.125	0.320513	0.342105	0.214286	0.675676	0.709091	0.857143	0.823529	0.660714	0.651163	0.777778	0.635294	0.727273	0.807692
22861935	Open Sea	0.622222	0.789474	0.875	0.388889	0.53125	0.8	0.405405	0.8125	0.304348	0.723404	0.628571	0.65	0.486486	0.434783	0.560976	0.4375	0.423077	0.404762	0.457143	0.454545	0.5	0.463415	0.259259	0.45	0.515152	0.222222	0.342857	0.452381	0.44	0.366667	0.388889	0.185185	0.458333	0.4	0.461538	0.180328	0.222222	0.166667	0.107143	0.609756	0.666667	0.857143	0.636364	0.558824	0.708333	0.565789	0.642857	0.894737
23872013	Open Sea	0.441176	0.781818	0.966667	0.636364	0.583333	0.634146	0.454545	0.652174	0.761905	0.569231	0.55102	0.545455	0.4	0.473684	0.388889	0.5	0.517241	0.522727	0.756757	0.607143	0.533333	0.4	0.6	0.125	0.208333	0.375	0.611111	0.6625	0.441176	0.488372	0.210526	0.596774	0.372881	0.342105	0.466667	0.326531	0.47619	0.8	0.916667	0.810811	0.894737	0.6	0.705882	0.893617	0.913043	0.75	0.947368	0.6
23872019	Open Sea	0.263158	0.661538	0.727273	0.606061	0.647059	0.4375	0.473684	0.478261	0.566667	0.367647	0.333333	0.360656	0.257143	0.619048	0.211538	0.4	0.526316	0.23913	0.555556	0.5	0.666667	0.34375	0.461538	0.321429	0.266667	0.333333	0.609756	0.630952	0.195122	0.254902	0.333333	0.575758	0.410714	0.382979	0.5	0.333333	0.478261	0.772727	0.846154	0.861111	0.894737	0.583333	0.666667	0.816327	0.904762	0.779412	0.736842	0.733333
23872021	Open Sea	0.243243	0.6	0.666667	0.59375	0.454545	0.354167	0.447368	0.377778	0.571429	0.246154	0.173913	0.344262	0.257143	0.439024	0.254902	0.288462	0.526316	0.26087	0.378378	0.4375	0.375	0.275862	0.68	0.214286	0.103448	0.2	0.475	0.488095	0.261905	0.294118	0.333333	0.5	0.232143	0.282609	0.5	0.23913	0.521739	0.681818	0.846154	0.771429	0.631579	0.666667	0.515152	0.87234	0.857143	0.647059	0.611111	0.6
23939131	Open Sea	0.410256	0.54717	0.363636	0.333333	0.424242	0.617647	0.434783	0.342105	0.461538	0.36	0.135135	0.431818	0.2	0.375	0.282609	0.3125	0.27027	0.536585	0.216216	0.314286	0.375	0.384615	0.315789	0.142857	0.119048	0.25	0.130435	0.142857	0.266667	0.114286	0.216216	0.15942	0.375	0.0697674	0.380952	0.1875	0.0967742	0.166667	0.789474	0.433333	0.714286	0.833333	0.542857	0.516129	0.73913	0.641026	0.375	0.411765
24286079	Open Sea	0.622449	0.759615	0.8125	0.828125	0.740741	0.873874	0.942308	0.803922	0.712121	0.778571	0.791367	0.476562	0.578125	0.647482	0.659341	0.604651	0.346774	0.467742	0.702128	0.318182	0.676471	0.533333	0.414414	0.549451	0.535088	0.671233	0.418033	0.476415	0.787611	0.576923	0.540323	0.5	0.62069	0.436782	0.586667	0.420513	0.747899	0.851064	0.545455	0.878049	0.823529	0.9375	0.70625	0.817073	0.798077	0.844086	0.714286	0.6
24286083	Open Sea	0.325581	0.530612	0.533333	0.839286	0.626667	0.71	0.849462	0.703704	0.42623	0.616	0.51938	0.245614	0.405172	0.464567	0.425	0.540541	0.184211	0.338983	0.516129	0.151515	0.496124	0.2	0.125	0.368421	0.269663	0.550725	0.262295	0.212435	0.694737	0.311828	0.324074	0.265625	0.371681	0.294118	0.483333	0.269231	0.574074	0.568182	0.25	0.804878	0.795918	0.925926	0.528571	0.776119	0.510638	0.717791	0.44186	0.465116
25280497	Open Sea	0.53125	0.464286	0.535714	0.774194	0.217391	0.489796	0.435897	0.439394	0.193548	0.24359	0.214286	0.246575	0.5625	0.434783	0.0689655	0.244898	0.0810811	0.0816327	0.297872	0.257143	0.225	0.166667	0.189655	0.0769231	0.132075	0.5	0.55102	0.333333	0.243243	0.18	0.375	0.291667	0.222222	0.295082	0.172414	0.22807	0.181818	0.346154	0.526316	0.541667	0.62069	0.242424	0.351351	0.512195	0.533333	0.280488	0.538462	0.555556
25280897	Open Sea	0.333333	0.6	0.428571	0.571429	0.586207	0.68	0.317073	0.515152	0.8	0.529412	0.347826	0.236842	0.433333	0.258065	0.421053	0.151515	0.769231	0.35	0.421053	0.444444	0.352941	0.444444	0.483871	0.363636	0.411765	0.4	0.464286	0.8	0.214286	0.294118	0.272727	0.454545	0.411765	0.37037	0.153846	0.428571	0.290323	0.454545	0.666667	0.742857	0.705882	0.625	0.636364	0.575758	0.545455	0.590909	0.875	0.733333
25861585	Open Sea	0.576923	0.72093	0.458333	0.636364	0.419355	0.658537	0.441176	0.756757	0.580645	0.612903	0.527273	0.326531	0.444444	0.404255	0.55814	0.142857	0.16129	0.193548	0.540541	0.315789	0.651163	0.324324	0.190476	0.230769	0.466667	0.48	0.682927	0.508475	0.487805	0.205882	0.142857	0.333333	0.452381	0.894737	0.230769	0.226415	0.571429	0.307692	0.647059	0.758621	0.764706	0.666667	0.9375	0.769231	0.64	0.78	0.769231	0.923077
25861593	Open Sea	0.69697	0.634615	0.291667	0.5	0.475	0.568182	0.46875	0.767442	0.678571	0.54902	0.411765	0.377358	0.28125	0.62069	0.568182	0.24	0.25	0.157895	0.657143	0.314286	0.586207	0.413043	0.25	0.277778	0.391304	0.52381	0.763158	0.608108	0.457143	0.227273	0.21875	0.373333	0.444444	0.680851	0.4	0.26087	0.5625	0.3	0.652174	0.740741	0.809524	0.461538	0.942857	0.833333	0.727273	0.777778	0.846154	0.833333
25916061	Open Sea	0.297297	0.34375	0.454545	0.351351	0.315789	0.366667	0.163934	0.166667	0.307692	0.265306	0.15	0.0652174	0.375	0.236842	0.447368	0.340909	0.2	0.108108	0.2	0.0645161	0.121212	0.275	0.25	0.125	0.210526	0.388889	0.301887	0.175676	0.205882	0.338983	0.194444	0.173333	0.32	0.274194	0.294118	0.254902	0.380952	0.12	0.571429	0.568182	0.424242	0.6	0.6	0.5	0.464286	0.553571	0.705882	0.866667
26906979	Open Sea	0.142857	0.113402	0.109375	0.306452	0.214286	0.4	0.22449	0.337662	0.263158	0.263736	0.196721	0.218182	0.28169	0.140351	0.326087	0.333333	0.209677	0.25	0.1125	0.12987	0.212121	0.153846	0.162162	0.114286	0.142857	0.333333	0.284404	0.25	0.254902	0.2	0.149254	0.174194	0.222222	0.261364	0.177778	0.158416	0.125	0.151515	0.571429	0.527027	0.723404	0.46875	0.463918	0.527473	0.571429	0.551724	0.755556	0.6
26906981	Open Sea	0.136364	0.122449	0.0923077	0.216667	0.109091	0.25	0.132653	0.2	0.184211	0.217391	0.114754	0.203704	0.257143	0.150442	0.221053	0.155844	0.0967742	0.206522	0.0769231	0.0789474	0.19403	0.169231	0.123288	0.111111	0.105263	0.290323	0.194444	0.19084	0.196078	0.147541	0.106061	0.173333	0.169014	0.258427	0.0851064	0.211538	0.0555556	0.151515	0.489796	0.5	0.75	0.40625	0.463158	0.48913	0.5625	0.486486	0.727273	0.6
28794575	Open Sea	0.708333	0.73913	0.846154	0.575758	0.592593	0.619048	0.363636	0.913043	0.133333	0.571429	0.125	0.655172	0.388889	0.421053	0.465517	0.4	0.326531	0.361702	0.3	0.25641	0.305556	0.368421	0.310345	0.473684	0.166667	0.342857	0.34375	0.291667	0.16129	0.111111	0.478261	0.239437	0.212121	0.148936	0.238095	0.157143	0.142857	0.266667	0.28	0.485714	0.384615	0.333333	0.394737	0.380952	0.676471	0.415385	0.588235	0.294118
29858673	Open Sea	0.222222	0.493151	0.0958904	0.517241	0.280702	0.742424	0.457143	0.826087	0.742857	0.752688	0.71875	0.741935	0.87931	0.790123	0.69863	0.828125	0.613636	0.786885	0.754386	0.836364	0.88	0.388889	0.779661	0.894737	0.898305	0.633333	0.809524	0.66	0.666667	0.851852	0.810811	0.792	0.568627	0.689655	0.72	0.8125	0.744186	0.6	0.428571	0.826087	0.511628	0.333333	0.692308	0.451613	0.478261	0.597403	0.615385	0.555556
30093949	Open Sea	0	0.597938	0	0	0.983607	0	0.9875	0	0	0.488636	0.0163934	0.959184	0.963855	0.481481	0.566667	0.492754	0.555556	0.493671	0.449275	0.462687	1	0.510204	0.553846	0.909091	0.446809	0.535714	0.486842	0.583942	0.525641	0.48	0.933333	0.986755	0.983871	0.463918	0.461538	0.966667	0.0149254	1	0	0.582278	0	0.644444	0.588235	0.454545	0.531915	0.557895	0.30303	0.448276
30276757	Open Sea	0.693333	0.626374	0.542857	0.326087	0.378049	0.376812	0.189474	0.58209	0.238095	0.356164	0.435294	0.354167	0.370968	0.318966	0.328767	0.375	0.356164	0.315217	0.366197	0.181818	0.340426	0.447761	0.445783	0.309091	0.263158	0.212766	0.291667	0.495935	0.443038	0.320513	0.407767	0.362319	0.486842	0.336634	0.0689655	0.495868	0.115385	0.324324	0.428571	0.530864	0.90625	0.902439	0.62069	0.733333	0.66	0.551724	0.8	0.666667
30276759	Open Sea	0.627451	0.540541	0.355932	0.515152	0.333333	0.363636	0.25	0.5	0.205882	0.328125	0.441176	0.317073	0.4	0.297872	0.301887	0.402778	0.263158	0.28	0.37037	0.184615	0.162162	0.433962	0.396825	0.342105	0.195652	0.152174	0.351852	0.463918	0.40678	0.277778	0.402299	0.349057	0.542857	0.348315	0.0526316	0.434343	0.106061	0.192308	0.351351	0.47619	0.785714	0.9375	0.608696	0.712329	0.690476	0.530435	0.857143	0.722222
30299025	Open Sea	0.75	0.714286	0.35	0.416667	0.666667	0.509434	0.652778	0.591837	0.305556	0.271739	0.275362	0.363636	0.489796	0.337662	0.333333	0.118644	0.418605	0.314286	0.266667	0.319149	0.590909	0.604167	0.313725	0.566667	0.217391	0.416667	0.469697	0.354167	0.37037	0.333333	0.306452	0.4375	0.472727	0.571429	0.3125	0.246914	0.2	0.333333	0.576923	0.653061	0.862069	0.681818	0.690909	0.828571	0.763158	0.769231	0.68	0.809524
30299027	Open Sea	0.6	0.597222	0.395349	0.351852	0.465116	0.471698	0.481013	0.533333	0.393939	0.2	0.216216	0.327273	0.307692	0.2125	0.346667	0.030303	0.291667	0.205479	0.147059	0.358491	0.44	0.470588	0.173077	0.333333	0.183673	0.307692	0.338462	0.22	0.315789	0.162791	0.21875	0.456522	0.274194	0.425287	0.212121	0.159091	0.204082	0.176471	0.4	0.54902	0.647059	0.478261	0.293103	0.716418	0.657895	0.588889	0.59375	0.625
30299029	Open Sea	0.483871	0.5875	0.333333	0.390625	0.319149	0.490566	0.478261	0.340909	0.333333	0.278261	0.177215	0.0714286	0.355932	0.178571	0.205128	0.0987654	0.192982	0.225	0.112676	0.107143	0.28125	0.347826	0.210526	0.258065	0.181818	0.107143	0.25	0.174312	0.176471	0.0408163	0.27027	0.356643	0.140845	0.371134	0.0882353	0.123711	0.16129	0.1	0.361111	0.714286	0.486486	0.428571	0.461538	0.44	0.446809	0.543478	0.444444	0.730769
30299031	Island	0.480519	0.64	0.239437	0.22973	0.385714	0.361111	0.628866	0.508475	0.389831	0.175573	0.182692	0.295775	0.235294	0.211538	0.188119	0.183673	0.228571	0.244444	0.155556	0.222222	0.3125	0.485714	0.278481	0.307692	0.264706	0.317073	0.258427	0.303279	0.448718	0.136986	0.285714	0.285714	0.309524	0.324561	0.179487	0.302752	0.158537	0.259259	0.465116	0.472222	0.854167	0.424242	0.646341	0.531915	0.583333	0.69697	0.615385	0.68
30299033	Island	0.367089	0.539823	0.181818	0.309524	0.432836	0.310811	0.339623	0.430769	0.403509	0.165468	0.17094	0.181818	0.185567	0.174312	0.242991	0.0970874	0.126761	0.145833	0.131868	0.134831	0.254902	0.385714	0.141176	0.380952	0.111111	0.333333	0.264706	0.226277	0.223529	0.0930233	0.19	0.262032	0.182796	0.316239	0.146341	0.272727	0.135417	0.0588235	0.382979	0.365854	0.648148	0.357143	0.482759	0.464646	0.491803	0.504587	0.7	0.464286
30299035	Island	0.580645	0.593496	0.301075	0.197802	0.540541	0.366667	0.508929	0.421053	0.349206	0.251748	0.267176	0.240964	0.268519	0.262295	0.271318	0.190083	0.235955	0.339623	0.26	0.281553	0.4	0.531646	0.296703	0.3125	0.341176	0.137255	0.318584	0.377358	0.205882	0.184783	0.33945	0.315	0.230088	0.387097	0.1875	0.198198	0.311321	0.25	0.603774	0.465116	0.596491	0.326531	0.602041	0.580357	0.439394	0.523077	0.744681	0.633333
30299037	Island	0.452632	0.416	0.138298	0.189474	0.306667	0.21978	0.396396	0.413333	0.296875	0.161972	0.171642	0.22093	0.290909	0.147541	0.231343	0.0826446	0.0666667	0.133333	0.121212	0.254717	0.3	0.275	0.157895	0.183673	0.116279	0.196078	0.176991	0.212121	0.227723	0.0526316	0.207207	0.309179	0.130435	0.261905	0.145833	0.130435	0.111111	0.0810811	0.464286	0.488636	0.578947	0.3	0.43	0.608696	0.373134	0.422222	0.571429	0.4
30299039	Island	0.391753	0.456693	0.158416	0.27619	0.402439	0.386139	0.431193	0.46988	0.373134	0.238095	0.215278	0.32967	0.304348	0.225564	0.22695	0.146341	0.181818	0.196429	0.180952	0.171429	0.467742	0.372093	0.232323	0.372549	0.204301	0.358491	0.214876	0.235955	0.327273	0.132653	0.330435	0.214612	0.216667	0.365672	0.169811	0.195122	0.245614	0.131579	0.508475	0.566667	0.465517	0.388889	0.504854	0.612903	0.453333	0.582192	0.693878	0.46875
30299041	Island	0.431193	0.359712	0.153846	0.285714	0.258824	0.304762	0.446429	0.352941	0.32	0.112583	0.166667	0.206186	0.147541	0.165468	0.202703	0.0909091	0.0970874	0.212963	0.0630631	0.1	0.242857	0.290698	0.107843	0.2	0.129032	0.229508	0.225806	0.176166	0.207207	0.0693069	0.182609	0.146552	0.166667	0.285714	0.114754	0.164062	0.162393	0.125	0.238806	0.340659	0.559322	0.355932	0.376147	0.556391	0.512821	0.401235	0.568627	0.205882
30299043	Island	0.460177	0.517483	0.144231	0.160377	0.261905	0.35514	0.396552	0.481928	0.276316	0.12963	0.22	0.158416	0.219512	0.151724	0.213333	0.0785714	0.150943	0.173913	0.190909	0.147826	0.28169	0.318681	0.2	0.285714	0.223404	0.258065	0.238462	0.168367	0.236842	0.0686275	0.238938	0.291139	0.155556	0.347518	0.196721	0.210526	0.15	0.121951	0.382353	0.354839	0.516129	0.423729	0.421053	0.533333	0.307692	0.39521	0.596154	0.542857
30299045	Island	0.46875	0.489209	0.272727	0.113924	0.259259	0.418182	0.367089	0.333333	0.333333	0.15748	0.100719	0.192982	0.218045	0.134228	0.048951	0.0791367	0.103093	0.175	0.163462	0.0841121	0.276923	0.268041	0.168142	0.307692	0.13253	0.12069	0.140625	0.183784	0.114286	0.09	0.110092	0.20362	0.119048	0.217054	0.277778	0.112	0.134615	0.0681818	0.41791	0.445652	0.45283	0.290323	0.368932	0.584	0.555556	0.48	0.613636	0.5
30299047	Island	0.363636	0.388489	0.344828	0.139241	0.2125	0.261261	0.216867	0.261364	0.16129	0.103175	0.0942029	0.136752	0.169231	0.125828	0.0833333	0.035461	0.0309278	0.122951	0.0571429	0.0877193	0.314286	0.204082	0.079646	0.25	0.0379747	0.0909091	0.112	0.136612	0.12963	0.0408163	0.168317	0.106481	0.0569106	0.193798	0.14	0.0708661	0.0679612	0.0930233	0.3125	0.344828	0.32	0.184615	0.346154	0.526718	0.246154	0.47191	0.452381	0.34375
30299049	Island	0.382353	0.414815	0.404762	0.131579	0.144737	0.333333	0.3125	0.275862	0.12069	0.122951	0.115108	0.179487	0.195312	0.156463	0.0948905	0.0522388	0.09	0.103448	0.0576923	0.0810811	0.287879	0.244898	0.0608696	0.233333	0.0394737	0.132075	0.113821	0.11236	0.142857	0.029703	0.141414	0.138889	0.0569106	0.224	0.25	0.0952381	0.0970874	0.0714286	0.457627	0.337079	0.45283	0.246154	0.37	0.565891	0.163934	0.508475	0.604651	0.352941
30299051	Island	0.35	0.30303	0.423529	0.162162	0.285714	0.306306	0.246753	0.252874	0.137931	0.0725806	0.111888	0.131579	0.176	0.123288	0.129496	0.0601504	0.0909091	0.144068	0.0882353	0.0454545	0.294118	0.247423	0.0701754	0.192982	0.0533333	0.132075	0.155738	0.0842697	0.157895	0.115385	0.118812	0.194313	0.0787402	0.129032	0.265306	0.0396825	0.0576923	0.0465116	0.383333	0.255556	0.307692	0.117647	0.252525	0.507812	0.266667	0.361582	0.55814	0.205882
30299053	Island	0.419355	0.484127	0.25	0.12	0.25	0.281818	0.32	0.340659	0.20339	0.0737705	0.111111	0.128205	0.185484	0.119205	0.123188	0.0769231	0.16	0.221311	0.0490196	0.0884956	0.342857	0.255319	0.12931	0.178571	0.0526316	0.109091	0.0887097	0.16185	0.192661	0.00943396	0.18	0.183036	0.116279	0.185484	0.153846	0.064	0.0721649	0.0909091	0.37931	0.404494	0.346939	0.208955	0.309278	0.533333	0.482143	0.408046	0.611111	0.294118
30299055	Island	0.358696	0.325397	0.162791	0.173333	0.207792	0.327273	0.2	0.244444	0.25	0.114754	0.0839161	0.0608696	0.137097	0.0921053	0.0928571	0.0846154	0.10101	0.116667	0.0288462	0.025641	0.238806	0.258065	0.0956522	0.218182	0.0263158	0.0740741	0.111111	0.108571	0.17757	0.0283019	0.09	0.124444	0.0952381	0.176	0.230769	0.0813008	0.0729167	0	0.322034	0.215909	0.3	0.19697	0.297872	0.433333	0.37037	0.422619	0.638889	0.30303
30299057	Island	0.408602	0.504202	0.168675	0.169014	0.259259	0.381818	0.287671	0.340909	0.245902	0.158333	0.175182	0.203704	0.214286	0.174497	0.176056	0.139535	0.132653	0.233333	0.179245	0.173913	0.461538	0.261364	0.142857	0.264151	0.0555556	0.137255	0.153846	0.160714	0.165049	0.104167	0.138614	0.162896	0.144	0.246032	0.301887	0.177419	0.173913	0.157895	0.409836	0.431818	0.533333	0.307692	0.37234	0.675214	0.482143	0.494048	0.675676	0.466667
30299059	Island	0.462366	0.573913	0.584416	0.3125	0.397436	0.352941	0.554054	0.341463	0.296875	0.178571	0.11811	0.283186	0.228814	0.222222	0.181818	0.108527	0.1875	0.267857	0.117647	0.155172	0.444444	0.365854	0.145631	0.276596	0.138889	0.25	0.237705	0.254658	0.306931	0.170455	0.17	0.188679	0.12605	0.309735	0.4	0.153846	0.0879121	0.138889	0.396552	0.566667	0.463415	0.392857	0.516129	0.623932	0.611111	0.576687	0.621622	0.310345
30299061	Island	0.505747	0.546296	0.426667	0.293103	0.386667	0.515789	0.630137	0.392405	0.440678	0.232143	0.177419	0.345455	0.280374	0.391304	0.310078	0.153226	0.295455	0.342593	0.222222	0.302752	0.283333	0.440476	0.320755	0.375	0.25	0.38	0.313559	0.248322	0.322917	0.229885	0.28866	0.310345	0.285714	0.472222	0.5	0.274336	0.197674	0.277778	0.428571	0.545455	0.575	0.529412	0.54023	0.32381	0.72	0.620253	0.805556	0.655172
30299063	Island	0.46875	0.530864	0.236364	0.0454545	0.236364	0.324324	0.384615	0.172414	0.372093	0.23913	0.10989	0.260417	0.197674	0.116667	0.156522	0.133333	0.0704225	0.255814	0.0714286	0.247059	0.423077	0.297297	0.146067	0.333333	0.145455	0.0540541	0.2	0.216667	0.2375	0.05	0.149425	0.162791	0.1	0.267442	0.416667	0.263158	0.128571	0.0645161	0.512195	0.417722	0.416667	0.25	0.397059	0.625	0.428571	0.42623	0.15625	0.545455
30299065	Island	0.396825	0.474359	0.222222	0.125	0.377358	0.239437	0.206349	0.224138	0.348837	0.179775	0.111111	0.244898	0.168675	0.210526	0.169643	0.103774	0.173913	0.280488	0.0864198	0.206897	0.396226	0.27027	0.287356	0.394737	0.0545455	0.0833333	0.1875	0.155172	0.2125	0.102564	0.151163	0.122093	0.211111	0.27907	0.277778	0.23913	0.101449	0.0625	0.425	0.468354	0.4	0.166667	0.5	0.647059	0.512195	0.541667	0.75	0.652174
30299067	Island	0.466667	0.591549	0.22807	0.210526	0.34	0.228571	0.349206	0.224138	0.333333	0.172414	0.134146	0.170213	0.12	0.279279	0.158879	0.117647	0.173913	0.194805	0.075	0.261364	0.339623	0.30137	0.168675	0.228571	0.0943396	0.147059	0.168421	0.172727	0.150685	0.0897436	0.204819	0.131737	0.137931	0.152941	0.307692	0.188889	0.0724638	0.193548	0.342105	0.628205	0.387097	0.434783	0.538462	0.767442	0.487805	0.554545	0.758621	0.391304
30299069	Island	0.46875	0.857143	0.473684	0.421053	0.5625	0.378788	0.639344	0.327273	0.609756	0.372093	0.317073	0.384615	0.24	0.342342	0.22549	0.191919	0.405797	0.324324	0.113924	0.397727	0.5	0.376812	0.341463	0.294118	0.259259	0.233333	0.347368	0.40566	0.293333	0.297297	0.303797	0.369697	0.393258	0.531646	0.473684	0.370787	0.30303	0.37037	0.558824	0.6625	0.709677	0.521739	0.65625	0.744186	0.634146	0.669725	0.814815	0.571429
30299071	Open Sea	0.474576	0.507937	0.28	0.216216	0.232558	0.183333	0.327586	0.3	0.324324	0.157143	0.0759494	0.186047	0.222222	0.25	0.0842105	0.0361446	0.111111	0.149254	0.128571	0.164706	0.311111	0.309091	0.0882353	0.242424	0.108696	0.0740741	0.174419	0.260417	0.126761	0.119403	0.22973	0.0915493	0.112676	0.257143	0.444444	0.164384	0.209677	0.2	0.34375	0.588235	0.259259	0.305556	0.45098	0.723684	0.292683	0.510417	0.76	0.5
30299073	Open Sea	0.350877	0.666667	0.191489	0.184211	0.205128	0.115385	0.185185	0.222222	0.3	0.102941	0.289855	0.25974	0.166667	0.235955	0.232558	0.0588235	0.0508475	0.112903	0.0819672	0.0843373	0.351351	0.304348	0.125	0.129032	0.186047	0.0344828	0.151899	0.182796	0.216667	0.121212	0.2	0.102362	0.190476	0.413793	0.3	0.16129	0.175439	0.0588235	0.290323	0.559322	0.407407	0.46875	0.520833	0.684932	0.394737	0.517647	0.590909	0.4375
30792171	Open Sea	0.973684	0.945455	0.902439	0.863636	0.9375	0.857143	0.9	0.88	0.952381	0.630769	0.72	0.903226	0.435897	0.5	0.62963	0.520833	0.842105	0.769231	0.806452	0.575758	0.416667	0.65625	0.444444	0.789474	0.705882	0.529412	0.54386	0.597403	0.529412	0.584906	0.53125	0.48	0.586207	0.375	0.76	0.5	0.538462	0.56	0.875	0.470588	0.941176	0.88	0.407407	0.872727	0.65625	0.723404	0.761905	0.833333
30792173	Open Sea	0.973684	0.964286	0.95122	0.847826	0.878788	0.857143	0.895833	0.92	0.909091	0.603175	0.788462	0.724138	0.564103	0.492958	0.576923	0.627451	0.916667	0.666667	0.71875	0.612903	0.5	0.709677	0.466667	0.947368	0.576923	0.588235	0.649123	0.75641	0.588235	0.685185	0.483871	0.671429	0.637931	0.571429	0.730769	0.507246	0.514286	0.44	0.8125	0.676471	0.833333	0.92	0.653846	0.767857	0.625	0.875	0.761905	0.75
30792179	Open Sea	0.977273	0.954545	0.914286	0.833333	1	0.846154	0.941176	0.735294	0.965517	0.602941	0.625	0.962963	0.408163	0.40678	0.606557	0.615385	0.69697	0.744681	0.785714	0.6	0.37037	0.552632	0.346154	0.863636	0.702128	0.52381	0.833333	0.684211	0.6	0.583333	0.59375	0.597015	0.419355	0.344828	0.666667	0.439394	0.542857	0.375	0.882353	0.512821	0.909091	0.95	0.357143	0.877551	0.655172	0.790323	0.818182	0.941176
31121983	Open Sea	0.306122	0.417722	0.56	0.368421	0.369565	0.333333	0.462963	0.480769	0.5	0.0879121	0.206897	0.20339	0.4	0.47619	0.142857	0.168831	0.238095	0.21875	0.0857143	0.170213	0.0540541	0.425926	0.137255	0.612903	0.206897	0.384615	0.520833	0.5625	0.236842	0.30303	0.363636	0.147826	0.214286	0.3	0.192308	0.350877	0.257143	0.25	0.269231	0.468085	0.928571	0.461538	0.514286	0.478261	0.72	0.648649	0.75	0.5
31121987	Open Sea	0.395349	0.742424	0.487805	0.296296	0.35	0.477273	0.456522	0.533333	0.571429	0.0972222	0.326923	0.170213	0.428571	0.5	0.159091	0.236111	0.1875	0.212121	0.153846	0.243902	0.129032	0.3125	0.14	0.481481	0.104167	0.36	0.541667	0.528571	0.277778	0.467742	0.5	0.18018	0.169811	0.344828	0.238095	0.269231	0.5	0.352941	0.478261	0.444444	0.714286	0.6	0.645161	0.621622	0.55	0.738462	0.588235	0.583333
32859873	Open Sea	0.571429	0.85	0.78	0.272727	0.590909	0.45283	0.272727	0.780488	0.173913	0.508475	0.5	0.516129	0.153846	0.368421	0.352941	0.324324	0.285714	0.282051	0.371429	0.432432	0.192308	0.454545	0.26087	0.263158	0.0384615	0.153846	0.311111	0.179487	0.107143	0.133333	0.151515	0.0810811	0.169231	0.277778	0.25	0.0701754	0.0666667	0.409091	0.190476	0.292683	0.769231	0.5	0.333333	0.518519	0.368421	0.37931	0.666667	0.214286
33737115	Island	0.711864	0.652778	0.72	0.472222	0.808511	0.697368	0.5625	0.212121	0.4	0.428571	0.493506	0.462687	0.508197	0.555556	0.613636	0.652632	0.333333	0.379747	0.6	0.57732	0.40625	0.608696	0.543689	0.358974	0.537037	0.625	0.739496	0.706349	0.360656	0.574713	0.679245	0.619792	0.58	0.297297	0.428571	0.543103	0.37037	0.6	0.586207	0.672131	0.540541	0.6875	0.674419	0.844444	0.807692	0.810127	0.794118	0.529412
33737117	Island	0.721311	0.8	0.833333	0.694444	0.744681	0.693333	0.634146	0.676471	0.64	0.69863	0.506173	0.731343	0.8125	0.662162	0.651685	0.695652	0.661765	0.658228	0.754098	0.617021	0.484848	0.657143	0.619048	0.538462	0.672727	0.833333	0.847458	0.732283	0.587302	0.561798	0.735849	0.721053	0.647059	0.786667	0.457627	0.747826	0.571429	0.809524	0.827586	0.774194	0.783784	0.787879	0.906977	0.944444	0.865385	0.911392	0.727273	0.789474
33737119	Island	0.492754	0.551282	0.716981	0.475	0.8125	0.518072	0.416667	0.425532	0.387097	0.472222	0.364706	0.442857	0.438356	0.464286	0.443396	0.333333	0.345679	0.433333	0.585714	0.336735	0.372549	0.486486	0.471698	0.4	0.5	0.483871	0.449153	0.390977	0.346667	0.371429	0.438596	0.341121	0.545455	0.52809	0.428571	0.481818	0.327586	0.47619	0.764706	0.637681	0.804878	0.810811	0.701754	0.702128	0.777778	0.804878	0.611111	0.473684
33737121	Island	0.408451	0.542169	0.464286	0.390244	0.422222	0.348837	0.36	0.431373	0.264706	0.333333	0.255814	0.289474	0.333333	0.292135	0.327273	0.25	0.21519	0.306931	0.458333	0.385417	0.263158	0.426667	0.254902	0.266667	0.186441	0.548387	0.327869	0.413534	0.2125	0.285714	0.396825	0.251142	0.355932	0.364583	0.389831	0.35514	0.225806	0.217391	0.666667	0.492958	0.697674	0.75	0.551724	0.696629	0.576923	0.6375	0.684211	0.444444
33737123	Island	0.671233	0.764706	0.796296	0.568182	0.792453	0.733333	0.708738	0.709091	0.735294	0.746667	0.597826	0.707317	0.728395	0.653465	0.672414	0.56044	0.716049	0.631068	0.791667	0.653465	0.58209	0.68	0.693069	0.543478	0.75	0.78125	0.77686	0.688406	0.654321	0.578947	0.709677	0.627193	0.836066	0.68932	0.596774	0.747748	0.575758	0.782609	0.911765	0.861111	0.957447	0.947368	0.896552	0.902174	0.925926	0.931034	0.820513	0.8125
33737125	Island	0.282051	0.46875	0.54386	0.44	0.696429	0.412371	0.5	0.45	0.4	0.283951	0.26	0.340206	0.460674	0.319672	0.456693	0.25	0.373626	0.258929	0.592105	0.320388	0.27027	0.346154	0.368932	0.208333	0.285714	0.512821	0.296875	0.342282	0.352273	0.403101	0.378378	0.316456	0.25	0.508772	0.405797	0.40625	0.164384	0.4	0.756757	0.567901	0.7	0.609756	0.818182	0.663265	0.660714	0.677083	0.511628	0.555556
33737127	Island	0.525	0.520408	0.482143	0.557692	0.654545	0.51	0.424779	0.419355	0.47619	0.5	0.37	0.292929	0.477778	0.336066	0.565891	0.392157	0.423913	0.33913	0.658228	0.436893	0.298701	0.473684	0.456311	0.347826	0.354839	0.564103	0.512	0.464052	0.377778	0.40625	0.540541	0.415254	0.475	0.567797	0.507246	0.458015	0.289474	0.555556	0.974359	0.658537	0.784314	0.6	0.686567	0.776596	0.735849	0.76	0.704545	0.611111
33737129	Island	0.358025	0.35	0.515625	0.309091	0.566667	0.326733	0.269565	0.402985	0.311111	0.448276	0.163265	0.265306	0.357895	0.262712	0.428571	0.355769	0.27451	0.231481	0.55814	0.25	0.307692	0.283951	0.314815	0.14	0.28125	0.428571	0.361345	0.367742	0.282609	0.348837	0.367647	0.236735	0.291139	0.393162	0.314286	0.340909	0.164557	0.241379	0.590909	0.458824	0.625	0.682927	0.5	0.684211	0.716981	0.619048	0.568182	0.444444
33737131	Island	0.487805	0.592233	0.809524	0.535714	0.770492	0.5	0.48062	0.507463	0.403846	0.5	0.336634	0.52	0.520833	0.477273	0.555556	0.480769	0.6	0.387097	0.62069	0.351852	0.4	0.435897	0.568807	0.471698	0.461538	0.4	0.507692	0.470199	0.423913	0.421875	0.614286	0.481781	0.641975	0.645161	0.575342	0.553191	0.315789	0.40625	0.770833	0.782609	0.857143	0.666667	0.738095	0.79	0.7	0.790909	0.738095	0.7
33737133	Island	0.674699	0.79	0.846154	0.696429	0.819672	0.63	0.725191	0.811594	0.557692	0.729167	0.54902	0.78	0.752577	0.742424	0.70922	0.580952	0.75	0.689922	0.797753	0.7	0.609195	0.728395	0.669725	0.636364	0.676923	0.673913	0.695312	0.666667	0.648936	0.661538	0.77027	0.763265	0.698795	0.738462	0.589041	0.643357	0.545455	0.647059	0.851064	0.913978	0.933333	0.883721	0.875	0.953271	0.864407	0.885965	0.93617	0.65
33737135	Island	0.535714	0.55	0.661538	0.515625	0.745763	0.584071	0.553957	0.633803	0.431034	0.540816	0.4375	0.534653	0.576923	0.468531	0.527397	0.571429	0.504762	0.476923	0.712766	0.460177	0.430108	0.493671	0.508621	0.508772	0.557377	0.44898	0.637795	0.548387	0.414141	0.516129	0.682353	0.526104	0.591398	0.57554	0.457143	0.659722	0.395062	0.416667	0.94	0.741935	0.893617	0.659091	0.769231	0.858491	0.758621	0.782946	0.755102	0.761905
33737137	Island	0.315217	0.431193	0.306452	0.393939	0.507937	0.350427	0.421429	0.4625	0.311475	0.247619	0.302521	0.330189	0.383929	0.297297	0.384615	0.2	0.333333	0.194245	0.458333	0.211864	0.16	0.317073	0.233333	0.224138	0.258065	0.235294	0.381679	0.398773	0.27619	0.346154	0.43956	0.370656	0.42	0.43871	0.232877	0.52027	0.309524	0.25641	0.701754	0.705263	0.510638	0.468085	0.572917	0.554545	0.416667	0.611111	0.490196	0.681818
33737139	Island	0.494949	0.587156	0.622951	0.567164	0.6875	0.445378	0.453901	0.45679	0.274194	0.458716	0.276423	0.388889	0.428571	0.353741	0.424837	0.296296	0.336207	0.359712	0.412371	0.409449	0.284314	0.402439	0.382609	0.396552	0.365079	0.32	0.453846	0.481707	0.314815	0.3	0.422222	0.389513	0.330097	0.448718	0.519481	0.583333	0.26506	0.5	0.677966	0.524752	0.630435	0.58	0.636364	0.678571	0.431034	0.645669	0.607843	0.545455
33737141	Island	0.485437	0.577586	0.421875	0.378788	0.730159	0.516667	0.478873	0.535714	0.47619	0.412281	0.504	0.46789	0.421053	0.315436	0.45098	0.409091	0.344828	0.352113	0.594059	0.363636	0.342857	0.481928	0.383929	0.269841	0.428571	0.326923	0.453846	0.378049	0.330275	0.423358	0.354839	0.424242	0.561905	0.478261	0.434211	0.509317	0.261364	0.425	0.824561	0.62037	0.75	0.692308	0.712871	0.789916	0.724138	0.731343	0.711538	0.818182
33737143	Island	0.180952	0.319672	0.352941	0.338028	0.515625	0.244094	0.295302	0.184783	0.277778	0.146341	0.246377	0.176991	0.285714	0.240964	0.36646	0.286885	0.25	0.18543	0.306306	0.3125	0.137931	0.285714	0.196721	0.174603	0.219178	0.172414	0.229008	0.27933	0.117647	0.275168	0.343434	0.259928	0.307018	0.252809	0.1625	0.317647	0.12	0.22449	0.530303	0.542373	0.576923	0.519231	0.354545	0.664179	0.545455	0.574468	0.611111	0.6
33737145	Island	0.161905	0.386555	0.453125	0.246377	0.403226	0.228346	0.22	0.25	0.197183	0.237705	0.202797	0.140187	0.286822	0.22561	0.296053	0.27193	0.14876	0.190476	0.28972	0.268116	0.121739	0.258824	0.166667	0.109375	0.179104	0.224138	0.235714	0.238636	0.115044	0.244898	0.316327	0.251852	0.311321	0.211111	0.2	0.253165	0.178947	0.282609	0.462687	0.40708	0.5	0.56	0.540541	0.533333	0.428571	0.525926	0.421053	0.384615
33737147	Island	0.306931	0.321101	0.672131	0.230769	0.607143	0.424779	0.219178	0.372093	0.358209	0.327731	0.263889	0.266667	0.238095	0.234177	0.363014	0.309735	0.267857	0.300699	0.490385	0.414815	0.192661	0.25	0.217391	0.283333	0.306452	0.288462	0.326241	0.367232	0.183486	0.219858	0.347368	0.258687	0.317308	0.403509	0.337838	0.38255	0.182796	0.295455	0.5	0.514019	0.613636	0.52	0.666667	0.546875	0.546875	0.650794	0.481481	0.44
33737149	Island	0.361905	0.415094	0.576271	0.30303	0.622642	0.377193	0.286713	0.267442	0.333333	0.29661	0.258741	0.192308	0.274194	0.224359	0.35461	0.278261	0.176991	0.21831	0.407767	0.359712	0.209091	0.277778	0.206897	0.131148	0.234375	0.288462	0.235714	0.248588	0.229358	0.197183	0.301075	0.187739	0.217822	0.406061	0.24	0.262069	0.119565	0.304348	0.564516	0.475728	0.418605	0.607843	0.650485	0.669291	0.587302	0.619048	0.54717	0.363636
33737151	Island	0.278846	0.382353	0.492063	0.353846	0.666667	0.299145	0.278571	0.37037	0.323077	0.307018	0.212766	0.186275	0.252101	0.190789	0.347826	0.236842	0.185185	0.291971	0.464646	0.251852	0.219048	0.325843	0.211009	0.241935	0.264706	0.294118	0.316547	0.269006	0.169811	0.18797	0.182796	0.203125	0.262626	0.372671	0.314286	0.244755	0.175824	0.244444	0.52459	0.574257	0.613636	0.519231	0.647059	0.546218	0.564516	0.655738	0.519231	0.684211
33737153	Island	0.36	0.47	0.583333	0.31746	0.679245	0.438095	0.348148	0.381579	0.296875	0.432432	0.22963	0.22449	0.201754	0.253425	0.343511	0.342342	0.262136	0.281481	0.466667	0.383459	0.237624	0.35443	0.283019	0.245614	0.333333	0.282609	0.358209	0.29878	0.191919	0.270677	0.325843	0.230126	0.333333	0.377358	0.352941	0.379562	0.131868	0.340909	0.52459	0.625	0.465116	0.634615	0.597938	0.66129	0.587302	0.730435	0.490566	0.368421
33737155	Island	0.358209	0.575342	0.4	0.408163	0.459459	0.368421	0.523256	0.321429	0.326531	0.423529	0.265487	0.383333	0.275862	0.306122	0.416667	0.358696	0.25	0.344444	0.5	0.317073	0.338028	0.328571	0.34375	0.227273	0.264151	0.323529	0.356436	0.35	0.232877	0.211111	0.394366	0.346734	0.343284	0.542857	0.295082	0.363636	0.22973	0.357143	0.78	0.632911	0.769231	0.558824	0.743243	0.628866	0.631579	0.719101	0.65	0.75
33737157	Island	0.230769	0.202899	0.176471	0.285714	0.393939	0.144928	0.127907	0.265306	0.119048	0.121622	0.0952381	0.245283	0.113924	0.266667	0.12766	0.181818	0.131579	0.155556	0.2	0.183333	0.101449	0.16129	0.11828	0.0222222	0.18	0.0967742	0.175258	0.201835	0.112676	0.144578	0.225352	0.119565	0.119403	0.212121	0.0983607	0.164948	0.0140845	0.266667	0.4	0.432432	0.304348	0.30303	0.424242	0.478723	0.385965	0.5	0.384615	0.4
33737159	Island	0.393443	0.441176	0.416667	0.395349	0.583333	0.342857	0.333333	0.333333	0.297297	0.264706	0.178218	0.423077	0.345679	0.304878	0.344444	0.382022	0.253333	0.256098	0.545455	0.274336	0.15625	0.345455	0.218391	0.0909091	0.191489	0.375	0.351064	0.357798	0.142857	0.411765	0.428571	0.284916	0.328125	0.494382	0.383333	0.420455	0.227273	0.310345	0.690476	0.614286	0.652174	0.588235	0.672131	0.833333	0.698113	0.696203	0.685714	0.590909
33737161	Island	0.315789	0.447761	0.311111	0.205128	0.419355	0.253731	0.380952	0.236842	0.225806	0.22807	0.160494	0.309524	0.109589	0.164179	0.160494	0.1875	0.203125	0.236842	0.510638	0.227723	0.109091	0.160714	0.135135	0.166667	0.23913	0.347826	0.284091	0.313725	0.0961538	0.21519	0.308824	0.222973	0.173077	0.25641	0.36	0.241379	0.172414	0.458333	0.5	0.6	0.555556	0.413793	0.526316	0.575	0.510204	0.444444	0.592593	0.47619
33737163	Island	0.403846	0.403226	0.166667	0.264706	0.576923	0.285714	0.275862	0.285714	0.310345	0.37037	0.195122	0.393939	0.235294	0.205882	0.228571	0.259259	0.241935	0.208333	0.297872	0.298969	0.0888889	0.254902	0.333333	0.195122	0.204545	0.363636	0.247059	0.296703	0.14	0.24	0.328125	0.304348	0.0869565	0.328358	0.294118	0.313253	0.188679	0.571429	0.647059	0.611111	0.611111	0.464286	0.66	0.922078	0.622222	0.666667	0.703704	0.695652
33737165	Island	0.297872	0.339623	0.25	0.0645161	0.47619	0.37037	0.0909091	0.222222	0.24	0.204082	0.0597015	0.363636	0.156863	0.175439	0.174603	0.194444	0.172414	0.186441	0.3	0.117647	0.027027	0.186047	0.186441	0.129032	0.204545	0.235294	0.120879	0.244444	0.0888889	0.19697	0.178571	0.198413	0.21875	0.178571	0.0425532	0.197183	0.0952381	0.3125	0.413793	0.302326	0.235294	0.32	0.333333	0.474576	0.425	0.552632	0.423077	0.263158
33737167	Island	0.377778	0.454545	0.23913	0.290323	0.714286	0.309091	0.309091	0.230769	0.26087	0.1875	0.238806	0.407407	0.176471	0.245283	0.254237	0.228571	0.214286	0.237288	0.307692	0.25	0.114286	0.311111	0.283333	0.225806	0.195652	0.25	0.288889	0.244444	0.113636	0.215385	0.132075	0.235772	0.290323	0.269231	0.125	0.358209	0.25641	0.5	0.535714	0.365854	0.3125	0.458333	0.666667	0.614035	0.538462	0.555556	0.541667	0.470588
33737169	Island	0.372093	0.5	0.326087	0.275862	0.666667	0.377358	0.196078	0.166667	0.272727	0.266667	0.15873	0.304348	0.212766	0.2	0.152542	0.180556	0.181818	0.189655	0.325	0.227273	0.147059	0.325581	0.192308	0.266667	0.159091	0.3125	0.202247	0.308511	0.075	0.258621	0.25	0.235294	0.241379	0.326087	0.229167	0.212121	0.0769231	0.428571	0.5	0.5	0.4	0.478261	0.589744	0.77193	0.410256	0.666667	0.6	0.294118
33737171	Island	0.304348	0.474576	0.454545	0.307692	0.428571	0.263158	0.136364	0.25	0.15	0.243902	0.151515	0.333333	0.222222	0.133333	0.172414	0.319444	0.166667	0.160714	0.282051	0.215909	0.0967742	0.413043	0.185185	0.2	0.146341	0.133333	0.179775	0.301075	0.0882353	0.163934	0.254902	0.162393	0.269231	0.216216	0.146341	0.246377	0.176471	0.307692	0.481481	0.372093	0.285714	0.37037	0.470588	0.636364	0.457143	0.6875	0.576923	0.263158
33737173	Island	0.209302	0.220339	0.22449	0.153846	0.304348	0.189655	0.155556	0.0869565	0.111111	0.121951	0.0895522	0.148148	0.0930233	0.0851064	0.0701754	0.157143	0.0784314	0.0754717	0.225	0.11236	0.0666667	0.222222	0.0943396	0.0625	0.152174	0.142857	0.136364	0.177778	0	0.0175439	0.137255	0.0614035	0.08	0.184211	0.125	0.108108	0.0882353	0.153846	0.407407	0.292683	0.166667	0.285714	0.34375	0.518519	0.257143	0.428571	0.407407	0.333333
33737175	Island	0.22	0.514706	0.372549	0.3	0.423077	0.358209	0.27451	0.307692	0.1875	0.304348	0.173913	0.225806	0.152174	0.150943	0.185185	0.363636	0.163636	0.160714	0.263158	0.197802	0.142857	0.267857	0.216667	0.195122	0.22807	0.2	0.159574	0.278846	0.148148	0.15873	0.163636	0.188976	0.266667	0.257143	0.125	0.325	0.171429	0.357143	0.542857	0.52	0.333333	0.357143	0.589744	0.789474	0.461538	0.71875	0.625	0.545455
33737177	Island	0.226415	0.307692	0.08	0.310345	0.5	0.409091	0.115385	0.230769	0.142857	0.23913	0.114286	0.16129	0.113636	0.148148	0.113208	0.160494	0.12963	0.0892857	0.0697674	0.117021	0.172414	0.140351	0.0793651	0.119048	0.220339	0.3125	0.0918367	0.219048	0.0344828	0.031746	0.111111	0.15942	0.181818	0.2	0.0196078	0.255814	0.108108	0.153846	0.470588	0.54	0.3125	0.344828	0.44186	0.557692	0.452381	0.625	0.354839	0.416667
33737179	Island	0.363636	0.521739	0.327273	0.444444	0.5	0.384615	0.267857	0.407407	0.307692	0.377778	0.171429	0.212121	0.166667	0.2	0.301887	0.241379	0.173077	0.206897	0.295455	0.25	0.0689655	0.258621	0.235294	0.209302	0.241379	0.3125	0.188119	0.315315	0.0909091	0.190476	0.254545	0.194245	0.34375	0.314286	0.263158	0.288889	0.175	0.230769	0.69697	0.557692	0.375	0.62069	0.581395	0.916667	0.487805	0.694444	0.558824	0.666667
33737181	Island	0.236364	0.289855	0.203704	0.0666667	0.40625	0.313433	0.152542	0.2	0.153846	0.25	0.0821918	0.117647	0.111111	0.166667	0.215686	0.204819	0.0816327	0.112903	0.209302	0.103093	0.08	0.203125	0.138889	0.0465116	0.183333	0.2	0.163462	0.219512	0.0285714	0.0441176	0.214286	0.138686	0.25	0.194444	0.0983607	0.147368	0.255814	0.153846	0.5	0.436364	0.176471	0.535714	0.577778	0.464286	0.333333	0.515152	0.424242	0.32
33737183	Island	0.264151	0.294118	0.196429	0.233333	0.46875	0.272727	0.20339	0.24	0.25	0.25	0.04	0.166667	0.113636	0.218182	0.153846	0.178571	0.0851064	0.112903	0.243902	0.103093	0.12	0.212121	0.152778	0.0697674	0.15	0.176471	0.142857	0.241935	0.0285714	0.0555556	0.125	0.138686	0.266667	0.138889	0.0645161	0.15625	0.119048	0.153846	0.631579	0.431034	0.235294	0.407407	0.409091	0.6	0.333333	0.529412	0.606061	0.583333
33737185	Island	0.298246	0.438356	0.267857	0.322581	0.363636	0.242857	0.174603	0.217391	0.272727	0.219512	0.0779221	0.105263	0.204545	0.232143	0.235294	0.147727	0.130435	0.15	0.179487	0.147368	0.0833333	0.2	0.171053	0.116279	0.0806452	0.363636	0.169811	0.21374	0.0571429	0.152778	0.0701754	0.164286	0.25	0.210526	0.109375	0.21	0.204545	0.25	0.578947	0.474576	0.388889	0.25	0.425532	0.611111	0.365854	0.513514	0.65625	0.586207
33737187	Island	0.25	0.589041	0.321429	0.322581	0.485714	0.287671	0.285714	0.227273	0.3	0.439024	0.179487	0.1	0.159091	0.216667	0.313725	0.213483	0.12766	0.193548	0.210526	0.242424	0.181818	0.214286	0.220779	0.0851064	0.227273	0.227273	0.163636	0.219697	0.0789474	0.164384	0.175439	0.220588	0.242424	0.243243	0.126984	0.266667	0.217391	0.166667	0.512195	0.580645	0.222222	0.4375	0.595745	0.517857	0.454545	0.578947	0.5	0.535714
33737189	Island	0.338235	0.519481	0.209677	0.4	0.5	0.276316	0.4	0.3	0	0.227273	0.115385	0.212766	0.191489	0.269841	0.173913	0.22449	0.155556	0.128571	0.121951	0.136842	0.117647	0.233766	0.233766	0.159091	0.211268	0.347826	0.175439	0.191176	0.162162	0.25641	0.266667	0.183824	0.3	0.236842	0.245902	0.238938	0.266667	0	0.545455	0.446154	0.3	0.548387	0.615385	0.603448	0.469388	0.675676	0.529412	0.451613
34916799	Open Sea	0.375	0.528571	0.543478	0.166667	0.564103	0.313433	0.36	0.392857	0.225806	0.223881	0.329114	0.245614	0.326087	0.311475	0.295082	0.180556	0.512195	0.3	0.229167	0.12	0.243902	0.265306	0.375	0.2	0.224138	0.413793	0.333333	0.364706	0.344262	0.265306	0.222222	0.236559	0.1875	0.266667	0.230769	0.263889	0.393443	0.1	0.4375	0.421053	0.413793	0.6875	0.54717	0.582278	0.461538	0.464286	0.775	0.785714
34916803	Open Sea	0.444444	0.567901	0.44	0.285714	0.511111	0.307692	0.387097	0.3125	0.483871	0.376471	0.333333	0.241379	0.387755	0.357143	0.348485	0.153846	0.444444	0.293103	0.367347	0.133333	0.318182	0.5	0.397059	0.28125	0.373134	0.5625	0.428571	0.371134	0.349206	0.34	0.404255	0.314815	0.289855	0.369048	0.322581	0.277108	0.4	0.0869565	0.685714	0.714286	0.516129	0.575	0.685185	0.658537	0.7	0.596774	0.85	0.705882
35949699	Open Sea	0.522727	0.666667	0.444444	0.826087	0.5	0.5	0.631579	0.666667	0.625	0.464789	0.204545	0.346154	0.475	0.472222	0.310345	0.365854	0.457143	0.36	0.454545	0.76	0.540541	0.425	0.175	0.7	0.205128	0.470588	0.56	0.409091	0.28125	0.325	0.636364	0.514286	0.318182	0.471698	0.304348	0.253968	0.234043	0.5	0.818182	0.615385	0.526316	0.578947	0.826087	0.707317	0.761905	0.703125	0.625	0.615385
35949703	Open Sea	0.375	0.510204	0.309524	0.73913	0.486486	0.534884	0.47619	0.692308	0.565217	0.5	0.25	0.365385	0.490196	0.402778	0.241379	0.21875	0.25	0.263158	0.323529	0.56	0.59375	0.5	0.195122	0.571429	0.0666667	0.466667	0.333333	0.342857	0.2	0.292683	0.555556	0.616279	0.466667	0.491525	0.363636	0.280702	0.08	0.25	0.791667	0.52	0.684211	0.666667	0.576923	0.58	0.68	0.6	0.65	0.636364
35949705	Open Sea	0.5	0.608696	0.560976	0.666667	0.6	0.636364	0.659091	0.576923	0.684211	0.478873	0.289474	0.333333	0.574468	0.426471	0.326923	0.333333	0.314286	0.381818	0.424242	0.869565	0.612903	0.560976	0.3	0.454545	0.133333	0.4	0.5	0.328125	0.228571	0.317073	0.5	0.682353	0.511111	0.480769	0.45	0.290909	0.170213	0.166667	0.96	0.666667	0.666667	0.894737	0.678571	0.608696	0.769231	0.714286	0.947368	0.75
35949711	Open Sea	0.482759	0.459459	0.463415	0.636364	0.538462	0.5	0.590909	0.6	0.636364	0.416667	0.1875	0.186047	0.341463	0.333333	0.333333	0.153846	0.323529	0.297872	0.294118	0.55	0.384615	0.342105	0.27907	0.384615	0.166667	0.466667	0.217391	0.285714	0.333333	0.371429	0.52381	0.434211	0.404762	0.454545	0.3	0.181818	0.15	0.0909091	0.7	0.791667	0.6	0.823529	0.518519	0.5	0.807692	0.650794	0.538462	0.9
36844067	Open Sea	0.315789	0.26	0.422222	0.333333	0.27027	0.25	0.0909091	0.3	0.0731707	0.2	0.151515	0.296296	0.179487	0.222222	0.176471	0.102564	0.186047	0.258065	0.1875	0.28	0.230769	0.30303	0.351351	0.142857	0.25641	0.172414	0.292683	0.231707	0.137931	0.175	0.263158	0.391892	0.0243902	0.234043	0.105263	0.35	0.192308	0.333333	0.6	0.69697	0.666667	0.73913	0.8	0.888889	0.615385	0.814815	0.85	0.9
37147137	Open Sea	0.208333	0.66	0.5	0.418605	0.611111	0.565217	0.4	0.533333	0.692308	0.338028	0.264706	0.292683	0.351351	0.42623	0.358491	0.353846	0.276596	0.230769	0.564103	0.384615	0.487179	0.4	0.442308	0.310345	0.225	0.185185	0.45	0.454545	0.368421	0.461538	0.470588	0.265487	0.375	0.395349	0.333333	0.265823	0.525	0.157895	0.391304	0.756098	0.625	0.787879	0.7	0.833333	0.285714	0.641791	0.821429	0.636364
37147141	Open Sea	0.5	0.541667	0.534884	0.666667	0.615385	0.631579	0.525	0.636364	0.9	0.416667	0.375	0.648649	0.628571	0.396226	0.5	0.483871	0.368421	0.333333	0.37931	0.555556	0.722222	0.413793	0.666667	0.517241	0.297297	0.166667	0.6	0.5625	0.0833333	0.472222	0.6	0.363636	0.586207	0.522727	0.307692	0.227273	0.5	0.176471	0.631579	0.852941	0.954545	0.896552	0.952381	0.914286	0.421053	0.888889	0.608696	0.7
37228265	Open Sea	0.760563	0.653846	0.796296	0.848485	0.738095	0.706667	0.955224	0.622642	0.533333	0.393939	0.40678	0.521739	0.518519	0.629213	0.197531	0.142857	0.526316	0.392157	0.540541	0.362069	0.509804	0.755102	0.366197	0.742857	0.510638	0.681818	0.791045	0.82	0.4	0.893617	0.5	0.722222	0.508475	0.666667	0.56	0.486842	0.431373	0.736842	0.931034	0.916667	0.88	0.9	0.775	0.968254	0.918919	0.917526	0.928571	0.875
37261211	Open Sea	0.421053	0.952381	0.92	0.65	0.75	0.636364	0.410256	0.740741	0.5	0.6	0.342105	0.558824	0.4	0.642857	0.354167	0.37931	0.294118	0.333333	0.5	0.444444	0.24	0.458333	0.407407	0.25	0.206897	0.2	0.463415	0.432836	0.297297	0.15	0.5	0.428571	0.375	0.388889	0.411765	0.207547	0.21875	0.416667	0.846154	0.580645	0.928571	0.764706	0.681818	0.810811	0.818182	0.815385	0.857143	0.882353
37261215	Open Sea	0.393939	0.910714	0.911765	0.655172	0.869565	0.644444	0.297872	0.666667	0.6	0.537037	0.36	0.5	0.358491	0.625	0.433333	0.244444	0.232558	0.323529	0.566667	0.470588	0.384615	0.441176	0.5	0.393939	0.230769	0.266667	0.591837	0.541176	0.291667	0.313725	0.520833	0.481481	0.62963	0.458333	0.565217	0.36	0.372093	0.388889	0.8	0.833333	0.809524	0.733333	0.941176	0.767857	0.909091	0.831325	0.722222	0.818182
38358569	Open Sea	0.87037	0.75	0.666667	1	0.902439	0.904762	0.826087	0.953125	0.84	0.769231	0.703125	0.788462	0.776119	0.728814	0.641026	0.592593	0.695652	0.533333	0.489362	0.354839	0.690476	0.857143	0.543478	0.735294	0.6	0.894737	0.853659	0.822222	0.763158	0.828571	0.487805	0.772727	0.8	0.666667	0.823529	0.913043	0.592593	0.8	1	0.962264	1	1	1	0.982143	1	1	0.888889	1
38575075	Open Sea	0.317073	0.658537	0.285714	0.75	0.322581	0.413043	0.436364	0.590909	0.709677	0.435897	0.148649	0.444444	0.282609	0.5	0.314286	0.302326	0.307692	0.258065	0.405405	0.28	0.310345	0.4	0.384615	0.272727	0.30303	0.222222	0.301587	0.3	0.211538	0.166667	0.342105	0.524752	0.350877	0.447761	0.259259	0.216216	0.372549	0.564103	0.647059	0.673913	0.75	0.3125	0.688889	0.638298	0.727273	0.608696	0.375	0.4
38575077	Open Sea	0.315789	0.641026	0.238095	0.62963	0.322581	0.418605	0.240741	0.457143	0.409091	0.405797	0.0307692	0.295455	0.358974	0.305085	0.196429	0.0810811	0.35	0.233333	0.323529	0.183673	0.12	0.2	0.338983	0.25	0.344828	0.0434783	0.25	0.280488	0.16	0.159091	0.272727	0.241379	0.226415	0.290323	0.125	0.164384	0.217391	0.166667	0.5	0.763158	0.764706	0.666667	0.512821	0.604651	0.705882	0.477778	0.166667	0.5
39741691	Open Sea	0.428571	0.52809	0.440678	0.333333	0.386364	0.647059	0.359551	0.605263	0.275	0.382353	0.417722	0.309859	0.253521	0.357143	0.202899	0.272727	0.192308	0.190476	0.319444	0.205128	0.186441	0.444444	0.145161	0.222222	0.0925926	0.212766	0.209302	0.31	0.177419	0.1875	0.283582	0.135714	0.112676	0.282051	0.128205	0.121429	0.197183	0.333333	0.405405	0.272727	0.777778	0.387755	0.369231	0.311828	0.462963	0.382812	0.5	0.485714
40214209	Island	0.333333	0.313253	0.125	0.507042	0.280702	0.392405	0.353846	0.229508	0.527778	0.319328	0.407895	0.285714	0.453125	0.419355	0.4	0.333333	0.365385	0.655172	0.375	0.441176	0.433962	0.383333	0.5	0.575758	0.755102	0.407407	0.45	0.34	0.6	0.566038	0.6	0.570175	0.352113	0.428571	0.6	0.731959	0.757576	0.6	0.648649	0.57377	0.243243	0.513514	0.595745	0.433735	0.448276	0.489583	0.347826	0.684211
40214211	Island	0.207317	0.355556	0.15942	0.430556	0.20339	0.175824	0.316456	0.0447761	0.421053	0.231405	0.297619	0.1625	0.369231	0.336842	0.376471	0.328947	0.285714	0.491525	0.349206	0.477612	0.267857	0.319444	0.431818	0.538462	0.647059	0.307692	0.289855	0.287037	0.423729	0.517857	0.466667	0.530435	0.236842	0.449275	0.68	0.653465	0.525	0.571429	0.621622	0.484375	0.2	0.473684	0.588235	0.305882	0.352941	0.481481	0.26087	0.608696
40214213	Island	0.359551	0.662921	0.42029	0.428571	0.28125	0.367816	0.435294	0.0266667	0.777778	0.29661	0.46988	0.2625	0.539683	0.44898	0.44086	0.465116	0.518519	0.586207	0.606557	0.484375	0.433962	0.443038	0.659574	0.568182	0.883721	0.538462	0.455882	0.413793	0.693548	0.701754	0.488889	0.713043	0.463415	0.628571	0.793103	0.804124	0.651163	0.714286	0.657143	0.61194	0.333333	0.609756	0.695652	0.505618	0.526316	0.625	0.48	0.52
40214215	Island	0.22093	0.555556	0.343284	0.366197	0.229508	0.204545	0.328947	0.0410959	0.571429	0.254237	0.453333	0.146667	0.474576	0.350515	0.410526	0.406977	0.352941	0.490566	0.484375	0.370968	0.45283	0.337838	0.512195	0.522727	0.707317	0.652174	0.246154	0.387931	0.634921	0.672727	0.560976	0.580357	0.363636	0.628571	0.703704	0.73494	0.568182	0.703704	0.575758	0.533333	0.170732	0.5	0.615385	0.3625	0.485714	0.528302	0.458333	0.541667
40214217	Island	0.231707	0.761364	0.545455	0.45	0.241379	0.241379	0.366197	0.0273973	0.709677	0.330357	0.558824	0.136986	0.482759	0.395604	0.413043	0.435294	0.46	0.490566	0.548387	0.389831	0.471698	0.405797	0.55814	0.674419	0.736842	0.590909	0.411765	0.373913	0.745763	0.690909	0.55	0.653846	0.438356	0.656716	0.714286	0.777778	0.690476	0.538462	0.757576	0.706897	0.289474	0.575	0.666667	0.386667	0.542857	0.586538	0.541667	0.615385
40214219	Island	0.392405	0.807229	0.532258	0.45614	0.259259	0.369048	0.5	0.0461538	0.615385	0.365385	0.597222	0.157143	0.666667	0.455556	0.494118	0.4375	0.45098	0.531915	0.576271	0.482759	0.533333	0.457143	0.634146	0.634146	0.828571	0.736842	0.460317	0.464912	0.689655	0.784314	0.472222	0.72	0.507042	0.634921	0.821429	0.816901	0.813953	0.5	0.823529	0.693878	0.323529	0.536585	0.674419	0.457143	0.636364	0.563107	0.5	0.615385
40214221	Island	0.298701	0.738095	0.542373	0.490196	0.2	0.234568	0.424242	0.031746	0.730769	0.273684	0.542373	0.121212	0.574074	0.439024	0.378049	0.376623	0.387755	0.533333	0.528302	0.425926	0.452381	0.477612	0.702703	0.621622	0.766667	0.684211	0.40678	0.504854	0.685185	0.66	0.6	0.694737	0.476923	0.614035	0.785714	0.720588	0.731707	0.55	0.65625	0.608696	0.25	0.560976	0.648649	0.424242	0.69697	0.555556	0.454545	0.592593
40214223	Island	0.189189	0.410256	0.315789	0.44898	0.170213	0.219512	0.343284	0.0461538	0.615385	0.228261	0.436364	0.125	0.54902	0.435897	0.351351	0.405405	0.382979	0.487179	0.517857	0.365385	0.463415	0.460317	0.529412	0.59375	0.592593	0.55	0.357143	0.375	0.673077	0.613636	0.5	0.576087	0.492308	0.622642	0.703704	0.695652	0.512821	0.555556	0.580645	0.659091	0.241379	0.571429	0.589744	0.328358	0.588235	0.494845	0.47619	0.481481
40214225	Island	0.238806	0.6	0.5	0.428571	0.133333	0.133333	0.328358	0.0461538	0.55	0.2	0.407407	0.109375	0.510204	0.45679	0.373134	0.358209	0.377778	0.4	0.403509	0.411765	0.459459	0.465517	0.421053	0.606061	0.64	0.5625	0.32	0.448276	0.6	0.512195	0.555556	0.522727	0.444444	0.541667	0.592593	0.671642	0.55	0.45	0.517241	0.534884	0.25	0.515152	0.595238	0.292308	0.621622	0.510638	0.45	0.52
40214227	Island	0.208955	0.371429	0.372549	0.456522	0.133333	0.115942	0.269841	0.047619	0.52381	0.225352	0.415094	0.0508475	0.5	0.402597	0.358209	0.298507	0.363636	0.441176	0.4	0.384615	0.333333	0.396552	0.425	0.515152	0.44	0.529412	0.208333	0.357143	0.519231	0.512195	0.567568	0.452381	0.377049	0.543478	0.518519	0.646154	0.65	0.315789	0.433333	0.418605	0.214286	0.40625	0.512195	0.223881	0.441176	0.5	0.4	0.461538
40214229	Island	0.145161	0.349206	0.205128	0.25	0.179487	0.0862069	0.321429	0.0338983	0.375	0.166667	0.363636	0.0862069	0.435897	0.428571	0.349206	0.372881	0.352941	0.419355	0.4	0.404255	0.34375	0.320755	0.351351	0.451613	0.285714	0.625	0.363636	0.375	0.348837	0.45	0.485714	0.424242	0.377778	0.410256	0.586207	0.580645	0.571429	0.318182	0.466667	0.487179	0.333333	0.391304	0.487805	0.208955	0.533333	0.376471	0.304348	0.5
40214231	Island	0.115385	0.222222	0.075	0.157895	0.171429	0.0357143	0.23913	0.0625	0.3	0.254902	0.282609	0.0588235	0.6	0.434783	0.288462	0.389831	0.382353	0.272727	0.302326	0.311111	0.193548	0.32	0.333333	0.44	0.176471	0.466667	0.378378	0.350649	0.378378	0.447368	0.435897	0.377049	0.319149	0.40625	0.44	0.563636	0.552632	0.352941	0.424242	0.40625	0.291667	0.28	0.424242	0.22807	0.464286	0.373333	0.333333	0.375
40214233	Island	0.115385	0.0943396	0.0930233	0.166667	0.147059	0.0363636	0.217391	0.0212766	0.263158	0.204082	0.295455	0.0638298	0.538462	0.426471	0.294118	0.362069	0.382353	0.242424	0.357143	0.363636	0.206897	0.306122	0.393939	0.434783	0.166667	0.642857	0.368421	0.381579	0.243243	0.486486	0.447368	0.457627	0.304348	0.290323	0.36	0.54717	0.527778	0.352941	0.393939	0.387097	0.291667	0.269231	0.393939	0.241379	0.464286	0.318841	0.333333	0.5
40214235	Island	0.104167	0.0769231	0.219512	0.166667	0.129032	0.0357143	0.217391	0.0227273	0.363636	0.234043	0.295455	0.0652174	0.6	0.382353	0.307692	0.372881	0.305556	0.21875	0.341463	0.348837	0.228571	0.283019	0.363636	0.35	0.166667	0.615385	0.4	0.341772	0.285714	0.470588	0.473684	0.392157	0.27907	0.393939	0.434783	0.55102	0.5	0.357143	0.4375	0.357143	0.304348	0.310345	0.387097	0.207547	0.357143	0.349206	0.285714	0.458333
40214237	Island	0.0754717	0.0740741	0	0.153846	0.0540541	0.0806452	0.204082	0.0232558	0.375	0.203704	0.265306	0.0338983	0.6	0.342105	0.254902	0.322034	0.342105	0.368421	0.304348	0.318182	0.27027	0.245283	0.358974	0.347826	0.461538	0.666667	0.375	0.3875	0.35	0.4	0.454545	0.432836	0.355556	0.372093	0.47619	0.557377	0.5	0.318182	0.375	0.387097	0.272727	0.413793	0.315789	0.174603	0.413793	0.360656	0.214286	0.433333
40214239	Island	0.137931	0.0952381	0.105263	0.139535	0.0526316	0.0862069	0.14	0.0638298	0.296296	0.185185	0.222222	0.0517241	0.536585	0.253165	0.20339	0.245902	0.297297	0.358974	0.306122	0.291667	0.285714	0.207547	0.342105	0.304348	0.5	0.4375	0.409091	0.345238	0.35	0.470588	0.5	0.405797	0.276596	0.403846	0.5	0.615385	0.478261	0.416667	0.451613	0.361111	0.304348	0.37931	0.277778	0.215385	0.333333	0.261538	0.259259	0.481481
40214241	Island	0.152542	0.0793651	0.097561	0.204545	0.0526316	0.0877193	0.176471	0.0612245	0.384615	0.263158	0.303571	0.0677966	0.512195	0.283951	0.280702	0.372881	0.405405	0.395349	0.294118	0.36	0.27907	0.283019	0.342105	0.36	0.548387	0.529412	0.4	0.385542	0.3	0.514286	0.431818	0.5	0.3125	0.396226	0.565217	0.666667	0.528302	0.423077	0.322581	0.4	0.363636	0.413793	0.297297	0.19697	0.333333	0.421875	0.178571	0.481481
40214243	Island	0.163934	0.0923077	0.0909091	0.139535	0.05	0.12069	0.163265	0.0588235	0.37037	0.224138	0.240741	0.0806452	0.575	0.333333	0.275862	0.389831	0.421053	0.409091	0.36	0.38	0.27907	0.259259	0.358974	0.36	0.5625	0.555556	0.404255	0.369048	0.292683	0.472222	0.488889	0.474359	0.288462	0.407407	0.454545	0.617647	0.527273	0.481481	0.3	0.404762	0.363636	0.4	0.263158	0.220588	0.333333	0.38806	0.178571	0.481481
40214245	Island	0.0645161	0.0882353	0.0869565	0.2	0.0434783	0.0701754	0.122449	0.0576923	0.269231	0.147541	0.272727	0.031746	0.452381	0.304878	0.262295	0.3	0.307692	0.363636	0.294118	0.384615	0.292683	0.272727	0.289474	0.36	0.527778	0.473684	0.391304	0.349398	0.243902	0.432432	0.409091	0.4375	0.313725	0.436364	0.521739	0.527027	0.482759	0.344828	0.310345	0.414634	0.333333	0.451613	0.27027	0.179104	0.305556	0.380282	0.233333	0.428571
40214247	Island	0.116667	0.144928	0.177778	0.0869565	0.0454545	0.12069	0.163265	0.0588235	0.333333	0.184615	0.280702	0.078125	0.55	0.4	0.301587	0.4	0.394737	0.325581	0.365385	0.351852	0.3	0.267857	0.368421	0.357143	0.641026	0.526316	0.404255	0.352941	0.285714	0.428571	0.5	0.463415	0.3	0.454545	0.48	0.644737	0.459016	0.428571	0.321429	0.390244	0.307692	0.482759	0.315789	0.222222	0.351351	0.473684	0.290323	0.464286
40214249	Island	0.116667	0.0714286	0.104167	0.0652174	0.0217391	0.101695	0.104167	0.0434783	0.185185	0.1875	0.236364	0.0327869	0.425	0.365854	0.214286	0.283333	0.394737	0.268293	0.3	0.352941	0.307692	0.258621	0.307692	0.275862	0.547619	0.375	0.369565	0.298851	0.214286	0.428571	0.511111	0.407407	0.26087	0.446429	0.291667	0.573333	0.465517	0.448276	0.259259	0.307692	0.24	0.433333	0.277778	0.211268	0.277778	0.363636	0.121212	0.4
40402177	Open Sea	0.555556	0.0163934	0.0285714	0.363636	0.272727	0.176471	0.25	0.586207	0.555556	0.638889	0.684211	0.666667	0.75	0.615385	0.709677	0.6	0.454545	0.767442	0.592593	0.65	0.5	0.642857	0.846154	0.611111	0.666667	0.714286	0.652174	0.642857	0.722222	0.631579	0.512821	0.617021	0.647059	0.536585	0.777778	0.694444	0.454545	0.75	0.5625	0.6	0.333333	0.714286	0.46875	0.452381	0.652174	0.565217	0.263158	0.214286
40489567	Open Sea	0.615385	0.567164	0.586957	0.513514	0.510204	0.333333	0.346154	0.37931	0.266667	0.140845	0.222222	0.320755	0.339623	0.266667	0.383721	0.333333	0.428571	0.457627	0.4	0.137931	0.630435	0.416667	0.482143	0.232558	0.264151	0.48	0.418605	0.325581	0.365854	0.306122	0.419355	0.306452	0.574468	0.333333	0.321429	0.360825	0.292308	0.473684	0.75	0.642857	0.59375	0.625	0.689655	0.759259	0.65	0.797101	0.764706	0.473684
40571417	Island	0.548387	0.538462	0.619048	0.545455	0.851852	0.878049	0.588235	0.566667	0.384615	0.183333	0.386364	0.325581	0.533333	0.561404	0.617021	0.0833333	0.428571	0.44898	0.290323	0.0882353	0.2	0.642857	0.366667	0.53125	0.3	0.636364	0.744186	0.527273	0.285714	0.326087	0.423077	0.185185	0.162791	0.695652	0.5	0.237288	0.0625	0.454545	0.8125	0.857143	0.928571	0.8	0.583333	0.851852	0.904762	0.82	0.769231	1
40571419	Island	0.424242	0.481481	0.318182	0.5	0.518519	0.690476	0.428571	0.5	0.307692	0.0491803	0.191489	0.302326	0.5	0.517241	0.333333	0.0810811	0.27907	0.37037	0.205882	0.0597015	0.133333	0.666667	0.242424	0.382353	0.28125	0.434783	0.477273	0.423729	0.15625	0.318182	0.285714	0.189189	0.159091	0.574468	0.333333	0.196429	0.106383	0.363636	0.333333	0.8125	0.933333	0.526316	0.459459	0.714286	0.714286	0.792453	0.571429	0.75
40571421	Island	0.575758	0.666667	0.4	0.444444	0.821429	0.913043	0.675	0.5625	0.615385	0.125	0.352941	0.418605	0.608696	0.666667	0.571429	0.0789474	0.465116	0.490909	0.485714	0.132353	0.290323	0.678571	0.289474	0.567568	0.314286	0.681818	0.673469	0.47619	0.393939	0.416667	0.535714	0.283333	0.217391	0.666667	0.59375	0.280702	0.204082	0.181818	0.894737	0.9375	0.941176	0.842105	0.666667	0.766667	0.73913	0.928571	0.733333	1
40571423	Island	0.560976	0.71875	0.625	0.560976	0.931034	0.9375	0.541667	0.641026	0.571429	0.118421	0.365079	0.604167	0.846154	0.527027	0.615385	0.2	0.428571	0.451613	0.422222	0.128205	0.166667	0.628571	0.311111	0.454545	0.315789	0.541667	0.714286	0.630952	0.340909	0.465517	0.484848	0.274074	0.22449	0.703704	0.451613	0.34375	0.2	0.285714	0.761905	0.909091	0.869565	0.826087	0.630435	0.921053	0.892857	0.913793	0.733333	1
40571425	Island	0.553191	0.757576	0.666667	0.488889	0.733333	0.833333	0.655172	0.625	0.5625	0.238636	0.338462	0.526316	0.666667	0.607595	0.614035	0.12963	0.509091	0.439394	0.38	0.160494	0.243243	0.763158	0.372549	0.416667	0.355556	0.666667	0.75	0.681319	0.408163	0.393443	0.583333	0.309859	0.20339	0.7	0.484848	0.347222	0.216667	0.466667	0.576923	0.925926	0.814815	0.84	0.698113	0.952381	0.933333	0.924242	0.8125	1
40571427	Island	0.54386	0.610169	0.408163	0.454545	0.828571	0.764045	0.7	0.440678	0.36	0.132743	0.197531	0.454545	0.75	0.644231	0.576923	0.128205	0.47541	0.333333	0.253731	0.126316	0.192308	0.72	0.338028	0.508475	0.396825	0.542857	0.564706	0.416667	0.230769	0.305882	0.431818	0.335227	0.264368	0.654321	0.4375	0.311828	0.151899	0.181818	0.682927	0.815789	0.833333	0.714286	0.690909	0.847458	0.837838	0.866667	0.818182	0.814815
40571429	Island	0.57377	0.583333	0.535714	0.5	0.863636	0.780952	0.797468	0.650794	0.357143	0.198347	0.295455	0.561798	0.857143	0.638655	0.638554	0.1875	0.515625	0.483146	0.442857	0.114286	0.163934	0.830508	0.375	0.508475	0.263158	0.685714	0.709302	0.523077	0.246377	0.44086	0.557692	0.331492	0.197917	0.682353	0.5	0.397959	0.291139	0.296296	0.772727	0.837209	0.882353	0.837838	0.690909	0.9375	0.947368	0.990909	0.863636	0.965517
40571431	Island	0.52459	0.527027	0.438596	0.34375	0.851064	0.62037	0.578313	0.57377	0.241379	0.0661157	0.159091	0.375	0.627119	0.576271	0.534884	0.0897436	0.4375	0.366667	0.256757	0.0673077	0.180328	0.677419	0.271605	0.366667	0.166667	0.454545	0.465909	0.396947	0.152778	0.22449	0.535714	0.0706522	0.22449	0.6	0.352941	0.294737	0.170732	0.142857	0.583333	0.818182	0.764706	0.487805	0.529412	0.869565	0.577778	0.91453	0.708333	0.83871
40571433	Island	0.491803	0.545455	0.517241	0.268657	0.875	0.715596	0.630952	0.451613	0.310345	0.178862	0.258065	0.318681	0.706897	0.583333	0.523256	0.15	0.412698	0.466667	0.273973	0.0666667	0.206349	0.733333	0.280488	0.483333	0.163934	0.382353	0.597701	0.44697	0.0972222	0.29703	0.465517	0.251366	0.153061	0.516129	0.392157	0.28125	0.160494	0.172414	0.583333	0.869565	0.823529	0.756098	0.653061	0.826087	0.844444	0.966387	0.73913	0.903226
40571435	Island	0.4	0.494118	0.392857	0.285714	0.777778	0.892857	0.784091	0.59375	0.351351	0.156522	0.185567	0.426966	0.758621	0.699029	0.528736	0.097561	0.558824	0.422222	0.306667	0.148936	0.150685	0.86	0.395349	0.56	0.275862	0.483871	0.658824	0.536232	0.136986	0.308411	0.540984	0.274725	0.186813	0.5625	0.415094	0.386139	0.116883	0.137931	0.723404	0.914894	0.878788	0.734694	0.591837	0.74359	0.913043	0.869565	0.619048	0.9375
40571437	Island	0.555556	0.632911	0.489796	0.366667	0.854167	0.726415	0.819444	0.65	0.393939	0.25	0.255556	0.539474	0.698113	0.673913	0.520548	0.16	0.566038	0.481013	0.233333	0.102564	0.307692	0.742857	0.435897	0.578947	0.226415	0.625	0.620253	0.612069	0.343284	0.453608	0.490909	0.191358	0.272727	0.4	0.52381	0.541176	0.275362	0.259259	0.654545	0.777778	0.772727	0.702128	0.772727	0.906667	0.8	0.96875	0.75	1
40571439	Island	0.560976	0.532468	0.465116	0.428571	0.755556	0.76699	0.80597	0.672414	0.363636	0.111111	0.243902	0.547945	0.77551	0.674157	0.454545	0.157143	0.66	0.39726	0.238095	0.16	0.322581	0.787879	0.4	0.6	0.229167	0.565217	0.630137	0.59633	0.271186	0.472527	0.636364	0.186207	0.27027	0.575	0.5	0.541176	0.285714	0.285714	0.615385	0.976744	0.761905	0.697674	0.685714	0.925373	0.944444	0.858824	0.933333	0.966667
40571441	Island	0.405405	0.555556	0.589744	0.288462	0.809524	0.855556	0.711538	0.641509	0.566667	0.157303	0.263158	0.507692	0.836735	0.705128	0.507937	0.145161	0.604651	0.46875	0.355932	0.242424	0.333333	0.818182	0.378788	0.485714	0.341463	0.619048	0.655738	0.597826	0.192308	0.493827	0.490196	0.15748	0.279412	0.716216	0.552632	0.450704	0.264151	0.37037	0.682927	0.8	1	0.842105	0.676471	0.907692	0.794118	0.987013	0.9375	1
40571443	Island	0.352941	0.521739	0.371429	0.313725	0.707317	0.619048	0.76	0.36	0.535714	0.141176	0.164384	0.5	0.777778	0.631579	0.423729	0.0909091	0.534884	0.338462	0.293103	0.129032	0.0925926	0.806452	0.454545	0.516129	0.166667	0.666667	0.551724	0.482759	0.215686	0.341463	0.520833	0.0737705	0.295082	0.550725	0.5	0.289855	0.192308	0.32	0.615385	0.677419	0.875	0.621622	0.678571	0.893939	0.818182	0.905405	0.823529	0.944444
40571445	Island	0.5	0.4	0.296296	0.255814	0.810811	0.578125	0.666667	0.575	0.464286	0.05	0.166667	0.487179	0.853659	0.596774	0.409091	0.108696	0.611111	0.403846	0.348837	0.108696	0.276596	0.761905	0.446809	0.36	0.142857	0.538462	0.54	0.540541	0.225	0.292308	0.477273	0.121212	0.214286	0.604167	0.391304	0.262295	0.261905	0.2	0.628571	0.888889	0.846154	0.625	0.65	0.9	0.90625	0.903846	0.882353	1
40571447	Island	0.538462	0.5	0.583333	0.325581	0.833333	0.822581	0.738095	0.725	0.423077	0.196721	0.258621	0.578947	0.815789	0.724138	0.47619	0.119048	0.647059	0.37037	0.454545	0.133333	0.377778	0.772727	0.391304	0.52	0.230769	0.5	0.645833	0.492754	0.162162	0.296875	0.534884	0.25	0.333333	0.673469	0.5	0.40678	0.341463	0.2	0.628571	1	0.846154	0.733333	0.65	0.957447	0.866667	0.84	0.823529	1
40643767	Open Sea	0.577778	0.545455	0.333333	0.473684	0.536585	0.480769	0.577465	0.25	0.461538	0.246154	0.172414	0.0701754	0.311111	0.258621	0.414634	0.0769231	0.304348	0.0967742	0.228571	0.108696	0.25	0.368421	0.333333	0.0666667	0.125	0.129032	0.423077	0.217391	0.111111	0.133333	0.27027	0.267606	0.269231	0.333333	0.0416667	0.38	0.421053	0.217391	0.482759	0.175	0.428571	0.533333	0.484848	0.425532	0.708333	0.43662	0.6	0.7
41309589	Open Sea	0.578947	0.66	0.657143	0.512195	0.542857	0.459459	0.366667	0.813953	0.666667	0.396226	0.135135	0.219512	0.365854	0.506849	0.403226	0.176471	0.447368	0.327869	0.619048	0.365385	0.275862	0.275362	0.352941	0.257143	0.176471	0.378378	0.612903	0.447059	0.2	0.302326	0.358491	0.489583	0.375	0.379747	0.114286	0.365854	0.369565	0.352941	0.571429	0.431818	0.580645	0.488372	0.612245	0.472527	0.458333	0.607143	0.681818	0.392857
41885119	Open Sea	0.228571	0.490909	0.145833	0.636364	0.470588	0.309524	0.790698	0.185185	0.444444	0.276596	0.577778	0.521739	0.410256	0.595745	0.305556	0.5	0.65	0.555556	0.689655	0.514286	0.692308	0.541667	0.3125	0.666667	0.633333	0.590909	0.840909	0.851351	0.689655	0.76	0.689655	0.621212	0.625	0.777778	0.631579	0.854167	0.921053	0.6	0.210526	0.142857	0.166667	0.318182	0.2	0.240741	0.36	0.179487	0.470588	0.428571
42140785	Open Sea	0.228571	0.4	0.368421	0.306122	0.411111	0.367816	0.158333	0.244444	0.253521	0.282609	0.2	0.376471	0.447917	0.189189	0.361345	0.128205	0.474227	0.195489	0.218391	0.144231	0.184211	0.359223	0.252174	0.318841	0.150538	0.253968	0.336957	0.42029	0.3125	0.173913	0.272727	0.193396	0.202128	0.309859	0.310345	0.15493	0.213592	0.245283	0.607143	0.659574	0.649123	0.681818	0.5	0.864583	0.735632	0.593985	0.771429	0.777778
43133661	Open Sea	0.571429	0.320513	0.354839	0.430556	0.542373	0.640625	0.164179	0.65625	0.404255	0.289474	0.297872	0.302326	0.309091	0.344444	0.183908	0.2	0.327869	0.298246	0.529412	0.148148	0.470588	0.44	0.325581	0.16129	0.160714	0.368421	0.296296	0.296	0.245283	0.25	0.333333	0.181102	0.253968	0.225806	0.0769231	0.254237	0.316667	0.222222	0.538462	0.525	0.571429	0.64	0.4	0.613636	0.488889	0.69	0.428571	0.555556
43133663	Open Sea	0.714286	0.375	0.310345	0.448276	0.533333	0.591837	0.212121	0.65625	0.395833	0.439394	0.317073	0.4	0.25	0.329114	0.246914	0.181818	0.326531	0.367347	0.4375	0.207547	0.451613	0.363636	0.527778	0.275862	0.235294	0.375	0.372549	0.375	0.306122	0.3	0.311111	0.186441	0.240741	0.208333	0.192308	0.288462	0.267857	0.208333	0.583333	0.393939	0.625	0.736842	0.382979	0.71875	0.542857	0.75	0.307692	0.722222
43133665	Open Sea	0.684211	0.413793	0.384615	0.462963	0.486486	0.666667	0.306452	0.606061	0.380952	0.5	0.358974	0.354839	0.27027	0.378788	0.261538	0.298246	0.340426	0.368421	0.655172	0.23913	0.423077	0.45	0.5	0.285714	0.177778	0.266667	0.4	0.351064	0.428571	0.354839	0.395833	0.223301	0.229167	0.276596	0.157895	0.276596	0.404255	0.125	0.565217	0.535714	0.772727	0.666667	0.361702	0.709677	0.515152	0.76	0.333333	0.642857
44239545	Open Sea	0.42	0.924242	0.738095	0.533333	0.611111	0.7	0.375	0.925	0.263158	0.52459	0.567568	0.72093	0.215686	0.47619	0.338462	0.339286	0.170213	0.269841	0.403509	0.45098	0.222222	0.276596	0.22449	0.0833333	0.037037	0.148148	0.345455	0.247312	0.181818	0.229167	0.435897	0.198198	0.3125	0.19697	0.137931	0.112676	0.27451	0.266667	0.310345	0.471698	0.518519	0.36	0.32	0.419355	0.411765	0.402985	0.222222	0.458333
44545197	Island	0.542857	0.979167	0.869565	0.53125	0.8	0.71875	0.586207	0.526316	0.45	0.295455	0.772727	0.590909	0.47619	0.290323	0.216667	0.482759	0.454545	0.428571	0.225	0.566667	0.391304	0.333333	0.216216	0.3125	0.21875	0.428571	0.303571	0.353846	0.107143	0.0909091	0.62069	0.183333	0.413793	0.517241	0.4	0.0877193	0.2	0.25	0.181818	0.317073	0.619048	0.2	0.4375	0.416667	0.230769	0.54717	0.346154	0.380952
44545199	Island	0.617647	0.866667	0.863636	0.59375	0.65	0.735294	0.375	0.65	0.526316	0.266667	0.5	0.5	0.428571	0.206897	0.118644	0.466667	0.393939	0.310345	0.225	0.516129	0.391304	0.3125	0.243243	0.266667	0.333333	0.5	0.240741	0.257576	0.153846	0.147059	0.482759	0.183333	0.37931	0.37931	0.3	0.0727273	0.105263	0.25	0.0909091	0.219512	0.47619	0.125	0.333333	0.25	0.538462	0.425926	0.307692	0.5
44848567	Open Sea	0.277228	0.519608	0.370968	0.372549	0.375	0.337349	0.196429	0.373333	0.354839	0.229167	0.15493	0.265306	0.247525	0.153846	0.214286	0.361905	0.0597015	0.0897436	0.178571	0.155556	0.121212	0.243243	0.37037	0.181818	0.160494	0.117647	0.288889	0.262295	0.157143	0.269663	0.22973	0.151899	0.458333	0.267857	0.195122	0.260417	0.192308	0.342857	0.489796	0.402439	0.583333	0.44	0.383562	0.547945	0.396552	0.43662	0.738095	0.535714
44848571	Open Sea	0.626866	0.890244	0.943396	0.72973	0.75	0.708333	0.61039	0.672727	0.666667	0.592593	0.355932	0.513514	0.519481	0.538462	0.445946	0.730159	0.380952	0.432432	0.508475	0.493506	0.54717	0.637681	0.803922	0.521739	0.426471	0.342857	0.569767	0.534653	0.37037	0.574074	0.588235	0.529412	0.785714	0.705882	0.576923	0.666667	0.382353	0.516129	0.888889	0.75	0.783784	0.84375	0.797101	0.859375	0.895833	0.894231	0.848485	0.913043
44848577	Open Sea	0.636364	0.8	0.972973	0.884615	0.866667	0.607843	0.6	0.805556	0.535714	0.481481	0.488889	0.490196	0.508772	0.539683	0.436364	0.733333	0.339286	0.490566	0.4375	0.483871	0.684211	0.578947	0.787879	0.4	0.333333	0.433333	0.546875	0.478261	0.394737	0.625	0.526316	0.526882	0.8	0.638889	0.470588	0.615385	0.285714	0.5	0.914286	0.692308	0.7	0.684211	0.795918	0.865385	0.789474	0.8	0.869565	0.909091
44939765	Island	0.823529	0.728571	0.948276	0.891304	0.75	0.96	0.566038	0.926829	0.795455	0.788732	0.788462	0.826923	0.457143	0.634615	0.630137	0.62069	0.679245	0.76087	0.615385	0.725	0.580645	0.880952	0.65	0.75	0.472727	0.69697	0.75	0.683168	0.702703	0.658537	0.644444	0.611111	0.710526	0.625	0.666667	0.526316	0.469388	0.724138	0.735294	0.744681	0.966667	0.75	0.884615	0.762712	0.709677	0.818182	0.714286	0.782609
44939767	Island	0.9375	0.797101	0.913793	0.886364	0.708333	0.784314	0.76	1	0.871795	0.757143	0.75	0.862745	0.8	0.617021	0.628571	0.642857	0.686275	0.7	0.694444	0.722222	0.59375	0.923077	0.794872	0.714286	0.555556	0.645161	0.772727	0.722772	0.611111	0.74359	0.674419	0.586538	0.638889	0.677419	0.777778	0.607143	0.6	0.703704	0.71875	0.652174	0.965517	0.685714	0.846154	0.8	0.607143	0.823529	0.814815	0.809524
44939769	Island	0.829268	0.642857	0.980392	0.731707	0.727273	0.820513	0.384615	0.861111	0.588235	0.656716	0.657895	0.642857	0.514286	0.512195	0.45	0.5	0.4	0.682927	0.371429	0.5	0.464286	0.459459	0.485714	0.44	0.163265	0.375	0.483333	0.522222	0.25	0.421053	0.428571	0.410526	0.486486	0.366667	0.181818	0.265306	0.209302	0.44	0.482759	0.52	0.846154	0.588235	0.619048	0.48	0.461538	0.722892	0.413793	0.631579
44939771	Island	0.771429	0.84	0.960784	0.777778	0.85	0.964286	0.545455	1	0.62963	0.796875	0.707317	0.756098	0.685714	0.756757	0.673077	0.673913	0.710526	0.714286	0.625	0.555556	0.615385	0.62069	0.571429	0.458333	0.27451	0.380952	0.660714	0.677778	0.583333	0.666667	0.571429	0.533333	0.53125	0.481481	0.666667	0.428571	0.342105	0.409091	0.68	0.705882	1	0.785714	0.833333	0.632653	0.56	0.769231	0.64	0.933333
44939773	Island	0.882353	0.72	0.979592	0.771429	0.666667	0.814815	0.393939	0.882353	0.615385	0.714286	0.609756	0.707317	0.529412	0.611111	0.5625	0.44186	0.552632	0.617647	0.484848	0.407407	0.52	0.571429	0.40625	0.458333	0.2	0.380952	0.490909	0.546512	0.416667	0.451613	0.380952	0.453488	0.580645	0.555556	0.5	0.357143	0.194444	0.238095	0.72	0.693878	0.842105	0.678571	0.777778	0.541667	0.44	0.760563	0.72	0.6
44939775	Island	0.939394	0.770833	1	0.909091	0.857143	0.925926	0.757576	0.969697	0.666667	0.779661	0.634146	0.894737	0.645161	0.676471	0.688889	0.642857	0.731707	0.727273	0.617647	0.814815	0.615385	0.862069	0.818182	0.789474	0.5	0.619048	0.615385	0.8	0.666667	0.551724	0.585366	0.580247	0.617647	0.62963	0.888889	0.5	0.542857	0.727273	0.92	0.7	0.833333	0.821429	0.944444	0.734694	0.76	0.869565	0.84	1
44939777	Island	0.9	0.717391	0.976744	0.677419	0.695652	0.727273	0.393939	1	0.478261	0.714286	0.575	0.705882	0.416667	0.387097	0.534884	0.564103	0.5	0.5625	0.342857	0.4	0.541667	0.678571	0.5	0.3	0.232558	0.333333	0.489796	0.525641	0.454545	0.375	0.552632	0.513889	0.59375	0.517241	0.529412	0.315789	0.352941	0.409091	0.6	0.553191	0.8125	0.75	0.764706	0.469388	0.5	0.731343	0.75	0.8
44939779	Island	0.793103	0.636364	0.878049	0.518519	0.52381	0.619048	0.272727	0.8	0.304348	0.472727	0.425	0.515152	0.291667	0.333333	0.422222	0.405405	0.416667	0.366667	0.333333	0.4	0.434783	0.37931	0.344828	0.35	0.097561	0.235294	0.367347	0.480519	0.35	0.130435	0.405405	0.376812	0.535714	0.333333	0.3125	0.205128	0.0833333	0.25	0.428571	0.377778	0.733333	0.538462	0.75	0.369565	0.32	0.626866	0.458333	1
45677575	Shore	0.798077	0.700935	0.460674	0.553191	0.604651	0.666667	0.431193	0.746988	0.755556	0.43662	0.463415	0.448276	0.324675	0.38806	0.293651	0.226415	0.442308	0.364706	0.311828	0.41791	0.318182	0.457447	0.318182	0.428571	0.2	0.28	0.214286	0.260638	0.2	0.26506	0.43956	0.130682	0.340426	0.301587	0.0909091	0.0662252	0.159091	0.310345	0.375	0.280992	0.491803	0.466667	0.395604	0.382353	0.344828	0.442424	0.441176	0.479167
45677583	Shore	0.722772	0.707547	0.402299	0.460674	0.585366	0.639344	0.446602	0.707317	0.622222	0.369565	0.4	0.477778	0.302632	0.410853	0.248	0.214286	0.257426	0.340909	0.223404	0.333333	0.421875	0.355556	0.287356	0.354167	0.154639	0.222222	0.241758	0.210811	0.175676	0.25	0.370787	0.134503	0.295455	0.230769	0.125	0.0748299	0.172414	0.327586	0.425926	0.324786	0.396552	0.34375	0.409091	0.305263	0.3	0.416149	0.368421	0.490196
46310311	Open Sea	0.66129	0.877778	0.945455	0.446154	0.640625	0.740741	0.625	0.745763	0.431373	0.656566	0.571429	0.681818	0.35	0.529412	0.402174	0.489362	0.367816	0.430108	0.380435	0.413043	0.368421	0.561644	0.333333	0.243902	0.189655	0.382353	0.373494	0.467153	0.134615	0.157895	0.422535	0.209677	0.5	0.282609	0.176471	0.138889	0.370968	0.52	0.466667	0.382353	0.813953	0.538462	0.4875	0.704762	0.422222	0.548673	0.421053	0.482759
46662311	Open Sea	0.37931	0.990991	0.905405	0.418919	0.584416	0.361702	0.253012	0.591549	0.188406	0.481481	0.326923	0.552632	0.163265	0.486486	0.276923	0.387387	0.329268	0.505376	0.325301	0.252525	0.25	0.307692	0.22619	0.171429	0.0352941	0.246377	0.306931	0.295337	0.0777778	0.173077	0.25	0.106599	0.255814	0.186916	0.196429	0.0526316	0.105882	0.196078	0.333333	0.219178	0.690909	0.305085	0.376623	0.613445	0.361702	0.297753	0.306452	0.695652
48201947	Open Sea	0.466667	0.904762	0.9375	0.515152	0.478261	0.434783	0.4	0.576923	0.217391	0.589744	0.263158	0.454545	0.208333	0.315789	0.244444	0.521739	0.388889	0.192308	0.314286	0.321429	0.210526	0.28125	0.173913	0.214286	0.04	0.25	0.25	0.234043	0.0833333	0.0952381	0.12	0.0689655	0.111111	0.216216	0.0555556	0.0217391	0.137931	0.0555556	0.333333	0.4	0.5	0.461538	0.217391	0.255814	0.230769	0.288889	0.333333	0.181818
48491981	Open Sea	0.692308	0.738095	0.777778	0.967742	0.827586	0.875	0.542857	0.885714	0.794872	0.585366	0.347826	0.651163	0.612903	0.583333	0.673913	0.414634	0.638889	0.5	0.69697	0.851852	0.75	0.727273	0.6875	0.238095	0.272727	0.785714	0.722222	0.618182	0.6	0.73913	0.875	0.5	0.638298	0.47619	0.714286	0.837838	0.5	0.545455	0.8	0.878788	0.73913	0.75	0.878788	0.925	0.909091	0.911765	0.809524	0.769231
48608711	Open Sea	0.413333	0.933333	0.961538	0.622642	0.573529	0.403846	0.283951	0.646154	0.111111	0.442478	0.386667	0.509091	0.225806	0.402174	0.229885	0.178082	0.313433	0.243902	0.366667	0.273973	0.25	0.181818	0.0641026	0.212121	0.0641026	0.142857	0.244186	0.29661	0.15873	0.0952381	0.08	0.0612245	0.243243	0.125	0.119048	0.0277778	0.03125	0.27027	0.225806	0.147059	0.725	0.270833	0.203125	0.300971	0.301887	0.251908	0.173077	0.463415
48902923	Open Sea	0.548387	0.931507	0.979592	0.510204	0.795918	0.892857	0.352941	0.884615	0.552632	0.553846	0.607143	0.7	0.30303	0.5	0.314815	0.5	0.516129	0.218182	0.457627	0.571429	0.285714	0.418182	0.244444	0.346154	0.205882	0.45	0.28	0.274725	0.097561	0.186047	0.423077	0.287356	0.510204	0.340426	0.5	0.268657	0.264706	0.454545	0.552632	0.37037	0.787879	0.46875	0.428571	0.540984	0.428571	0.284211	0.555556	0.230769
49258049	Open Sea	0.589744	0.363636	0.228571	0.517241	0.666667	0.594595	0.483871	0.454545	0.6	0.382979	0.28	0.25	0.267857	0.235294	0.14	0.291667	0.32	0.1875	0.341463	0.275862	0.173913	0.4	0.181818	0.35	0.0652174	0.181818	0.346939	0.421875	0.129032	0.179487	0.333333	0.219512	0.212121	0.296296	0.3125	0.302326	0.195122	0.2	0.2	0.387097	0.9	0.551724	0.5	0.434783	0.411765	0.413793	0.315789	0.25
49309563	Island	0.555556	0.575	0.5	0.625	0.571429	0.296296	0.526316	0.714286	0.533333	0.490909	0.214286	0.333333	0.44898	0.367347	0.195122	0.2	0.4	0.25641	0.481481	0.388889	0.346154	0.40625	0.235294	0.216216	0.176471	0.266667	0.315789	0.333333	0.314286	0.382353	0.317073	0.231884	0.296296	0.3	0.272727	0.265306	0.380952	0.375	1	0.4	0.8	0.65	0.617647	0.69697	0.666667	0.78	0.842105	0.642857
49309565	Island	0.310345	0.288889	0.315789	0.518519	0.571429	0.277778	0.525	0.636364	0.4375	0.266667	0.125	0.424242	0.313725	0.307692	0.113636	0.047619	0.292683	0.162791	0.413793	0.342105	0.222222	0.388889	0.175	0.139535	0.235294	0.263158	0.222222	0.214286	0.170732	0.222222	0.195652	0.157895	0.242424	0.204082	0.142857	0.215686	0.291667	0.263158	0.714286	0.481481	0.692308	0.47619	0.527778	0.583333	0.4	0.545455	0.6	0.466667
49309567	Island	0.428571	0.535714	0.461538	0.612903	0.5	0.294118	0.565217	0.652174	0.466667	0.393443	0.138889	0.261905	0.436364	0.305085	0.244898	0.106383	0.282609	0.133333	0.322581	0.404762	0.296296	0.302326	0.276596	0.155556	0.263158	0.333333	0.32	0.295082	0.295455	0.27027	0.186047	0.214286	0.235294	0.224138	0.21875	0.283333	0.34375	0.3	1	0.483871	0.666667	0.625	0.512195	0.555556	0.676471	0.666667	0.608696	0.411765
49309569	Island	0.444444	0.378788	0.357143	0.617647	0.44	0.323529	0.44898	0.607143	0.526316	0.408451	0.333333	0.244444	0.327273	0.287879	0.137255	0.134615	0.326923	0.195652	0.4	0.288889	0.346154	0.340909	0.28	0.227273	0.26087	0.4	0.35	0.31746	0.209302	0.297297	0.326087	0.1875	0.317073	0.262295	0.171429	0.261538	0.352941	0.315789	1	0.558824	0.8125	0.652174	0.55	0.641026	0.583333	0.733333	0.75	0.578947
49309571	Island	0.526316	0.469697	0.465116	0.636364	0.32	0.243243	0.530612	0.7	0.473684	0.373333	0.372549	0.295455	0.377358	0.328358	0.132075	0.134615	0.297872	0.22	0.423077	0.229167	0.4	0.309524	0.212766	0.243902	0.2	0.555556	0.288136	0.322581	0.23913	0.3	0.311111	0.231707	0.295455	0.25	0.142857	0.246377	0.289474	0.352941	0.857143	0.594595	0.764706	0.652174	0.463415	0.707317	0.545455	0.758065	0.769231	0.6
49309573	Island	0.628571	0.461538	0.511628	0.774194	0.48	0.428571	0.428571	0.592593	0.578947	0.36	0.296296	0.318182	0.446429	0.403226	0.203704	0.181818	0.369565	0.217391	0.434783	0.367347	0.304348	0.333333	0.28	0.325	0.208333	0.625	0.403509	0.360656	0.25	0.380952	0.380952	0.258824	0.377778	0.389831	0.151515	0.363636	0.447368	0.333333	0.904762	0.641026	0.8	0.708333	0.692308	0.7	0.5625	0.758065	0.916667	0.578947
49309575	Island	0.457143	0.477612	0.47619	0.677419	0.48	0.323529	0.541667	0.666667	0.578947	0.3375	0.166667	0.386364	0.403509	0.307692	0.2	0.181818	0.3125	0.195652	0.347826	0.183673	0.2	0.357143	0.244898	0.317073	0.166667	0.235294	0.210526	0.258065	0.234043	0.309524	0.377778	0.224719	0.222222	0.254237	0.181818	0.272727	0.236842	0.3125	0.809524	0.641026	0.8125	0.590909	0.564103	0.65	0.59375	0.786885	0.875	0.55
49309577	Island	0.588235	0.520548	0.564103	0.727273	0.444444	0.382353	0.5	0.733333	0.73913	0.420455	0.358491	0.608696	0.395833	0.439394	0.218182	0.209677	0.520833	0.159091	0.5	0.372549	0.458333	0.416667	0.32	0.307692	0.178571	0.526316	0.457627	0.298507	0.345455	0.372093	0.382979	0.258427	0.44	0.409836	0.179487	0.33871	0.431818	0.210526	0.956522	0.604167	0.705882	0.769231	0.69697	0.763158	0.612903	0.818182	0.84	0.611111
49309579	Island	0.684211	0.592105	0.6	0.783784	0.483871	0.609756	0.508475	0.724138	0.692308	0.522222	0.418182	0.6875	0.54	0.454545	0.296296	0.311475	0.423077	0.32	0.5	0.462963	0.473684	0.466667	0.354167	0.2	0.212121	0.5	0.433333	0.36	0.362069	0.358491	0.375	0.340909	0.433962	0.333333	0.243902	0.431034	0.511628	0.35	1	0.695652	0.722222	0.7	0.885714	0.789474	0.548387	0.849057	0.809524	0.785714
49309581	Island	0.5	0.460526	0.394737	0.676471	0.344828	0.560976	0.338983	0.611111	0.645161	0.346939	0.235294	0.490196	0.588235	0.350649	0.208333	0.0819672	0.387755	0.173077	0.454545	0.333333	0.333333	0.52	0.25	0.166667	0.238095	0.4	0.368421	0.263158	0.25	0.339286	0.301887	0.284314	0.415094	0.275862	0.111111	0.283333	0.307692	0.217391	1	0.625	0.75	0.69697	0.852941	0.710526	0.46875	0.823529	0.842105	0.647059
49309583	Island	0.5	0.5	0.472222	0.7	0.366667	0.461538	0.375	0.583333	0.612903	0.306931	0.269841	0.425532	0.411765	0.313253	0.16	0.0985915	0.269231	0.185185	0.461538	0.2	0.333333	0.461538	0.295455	0.114286	0.2	0.25	0.350877	0.184615	0.209677	0.327586	0.189655	0.244898	0.362069	0.280702	0.138889	0.246154	0.357143	0.346154	0.85	0.612245	0.73913	0.727273	0.589744	0.615385	0.4	0.818182	0.882353	0.421053
49309585	Island	0.511111	0.368421	0.542857	0.677419	0.363636	0.4	0.430769	0.605263	0.625	0.342857	0.322581	0.458333	0.5	0.348837	0.208333	0.0945946	0.377358	0.203704	0.473684	0.307692	0.333333	0.509804	0.27907	0.0857143	0.2	0.266667	0.288136	0.289855	0.1875	0.344262	0.216667	0.294118	0.377049	0.350877	0.111111	0.294118	0.392857	0.307692	0.941176	0.588235	0.727273	0.75	0.65	0.820513	0.387097	0.851852	0.722222	0.545455
49309587	Island	0.404762	0.410256	0.513514	0.486486	0.4375	0.418605	0.38806	0.416667	0.5	0.238095	0.131148	0.4	0.4	0.252874	0.125	0.133333	0.22807	0.127273	0.318182	0.176471	0.181818	0.490566	0.225	0.0571429	0.04	0.222222	0.288136	0.24	0.151515	0.253968	0.166667	0.196262	0.414286	0.213115	0.0833333	0.294118	0.421053	0.352941	0.875	0.472727	0.590909	0.5625	0.525	0.642857	0.333333	0.686275	0.555556	0.545455
49309589	Island	0.4	0.4	0.552632	0.529412	0.485714	0.44186	0.393939	0.444444	0.542857	0.27619	0.258621	0.565217	0.45283	0.306818	0.234043	0.131579	0.280702	0.155172	0.434783	0.253731	0.4	0.535714	0.261905	0.027027	0.12766	0.222222	0.25	0.272727	0.151515	0.31746	0.186441	0.228814	0.391304	0.15	0.0789474	0.287879	0.366667	0.428571	0.823529	0.438596	0.636364	0.7	0.675	0.622222	0.37931	0.823529	0.8	0.571429
49309591	Island	0.181818	0.324324	0.225	0.421053	0.315789	0.461538	0.254237	0.25	0.382353	0.15534	0.148148	0.232558	0.303571	0.178571	0.0930233	0.027027	0.122807	0.134615	0.145833	0.138462	0.227273	0.403846	0.142857	0.0277778	0.0625	0.1	0.137931	0.101266	0.0694444	0.2	0.137931	0.0940171	0.238806	0.209677	0.027027	0.0757576	0.147541	0.205882	0.777778	0.25	0.375	0.441176	0.317073	0.333333	0.354839	0.58	0.214286	0.5
49309593	Island	0.372093	0.350877	0.486486	0.4375	0.37931	0.441176	0.195652	0.342857	0.461538	0.153846	0.119048	0.457143	0.34	0.226667	0.0277778	0.0724638	0.346154	0.102041	0.5	0.0784314	0.409091	0.42	0.166667	0.133333	0.05	0.304348	0.0851064	0.169014	0.0877193	0.0943396	0.203704	0.12	0.266667	0.2	0	0.169231	0.309091	0.137931	0.588235	0.34	0.666667	0.518519	0.642857	0.463415	0.222222	0.68	0.454545	0.722222
49309595	Island	0.333333	0.433962	0.305556	0.59375	0.551724	0.466667	0.340909	0.5	0.48	0.213333	0.184211	0.484848	0.333333	0.216216	0.15625	0.136364	0.326087	0.195652	0.3	0.122449	0.380952	0.510204	0.235294	0.166667	0.0857143	0.318182	0.177778	0.212121	0.113208	0.235294	0.122807	0.197917	0.241379	0.262295	0.0434783	0.140625	0.298246	0.448276	0.588235	0.531915	0.75	0.615385	0.589744	0.8	0.192308	0.73913	0.727273	0.529412
49316623	Open Sea	0.541667	0.337838	0.372093	0.642857	0.205882	0.475	0.212121	0.522388	0.305556	0.382353	0.241379	0.338462	0.193548	0.310345	0.182796	0.325581	0.345455	0.225352	0.210526	0.296296	0.303571	0.196721	0.193548	0.129032	0.255319	0.157895	0.424242	0.381818	0.147541	0.113208	0.142857	0.175439	0.206349	0.211111	0.125	0.0238095	0.107692	0.32	0.53125	0.561404	0.96875	0.319149	0.59322	0.357143	0.75	0.4375	0.65625	0.583333
49316625	Open Sea	0.535714	0.561644	0.576923	0.777778	0.594595	0.658537	0.297297	0.602941	0.435897	0.445946	0.393939	0.432432	0.21875	0.404494	0.257732	0.341176	0.37931	0.305556	0.333333	0.493976	0.339286	0.342466	0.208955	0.21875	0.285714	0.243902	0.492754	0.487179	0.190476	0.127273	0.12	0.261682	0.271429	0.222222	0.228571	0.0430108	0.19403	0.44	0.55	0.603175	0.966667	0.423077	0.6	0.488636	0.767442	0.516949	0.636364	0.72
49316627	Open Sea	0.551724	0.303797	0.27451	0.5	0.289474	0.475	0.311688	0.529412	0.378378	0.28	0.235294	0.289474	0.181818	0.244444	0.176471	0.261364	0.258621	0.22973	0.232558	0.333333	0.181818	0.232877	0.171429	0.0571429	0.188679	0.111111	0.397059	0.365079	0.112903	0.125	0.08	0.189189	0.19403	0.192308	0.114286	0.0412371	0.125	0.464286	0.454545	0.492537	0.911765	0.3125	0.535211	0.333333	0.744186	0.404959	0.621622	0.458333
49316629	Open Sea	0.517241	0.207547	0.166667	0.354839	0.333333	0.434783	0.333333	0.461538	0.277778	0.195122	0.291667	0.318182	0.230769	0.22449	0.22807	0.245283	0.289474	0.25	0.216216	0.230769	0.322581	0.22449	0.195122	0.0833333	0.34375	0.115385	0.292683	0.307692	0.125	0.103448	0.0666667	0.113208	0.125	0.321429	0.0555556	0.0454545	0.0277778	0.111111	0.444444	0.586957	0.75	0.233333	0.469388	0.463415	0.7	0.4	0.473684	0.285714
49695267	Island	0.529412	0.2	0.166667	0.230769	0.310345	0.333333	0.25	0.35	0.173913	0.288889	0.142857	0.16129	0.0540541	0.0625	0.0212766	0.106383	0.0540541	0.25641	0.0833333	0.0731707	0	0.107143	0.0645161	0.0666667	0	0.1	0.225	0.0666667	0.0322581	0.0294118	0.176471	0.0540541	0.0731707	0	0.0526316	0.121212	0.0588235	0.111111	0.2	0.229167	0.333333	0.2	0.243243	0.35	0.111111	0.213115	0.142857	0.214286
49695269	Island	0.705882	0.282609	0.511628	0.518519	0.533333	0.6	0.410256	0.26087	0.333333	0.375	0.540541	0.375	0.225	0.276923	0.326087	0.387755	0.35	0.404762	0.425532	0.255814	0.238095	0.416667	0.4375	0.266667	0.259259	0.428571	0.268293	0.557377	0.34375	0.333333	0.294118	0.373333	0.3	0.204545	0.3	0.415385	0.323529	0.380952	0.533333	0.604167	0.647059	0.478261	0.684211	0.613636	0.705882	0.533333	0.285714	0.5
49695271	Island	0.583333	0.234043	0.125	0.321429	0.466667	0.40625	0.229167	0.230769	0.208333	0.22	0.0810811	0.272727	0.121951	0.0615385	0.0444444	0.0769231	0.214286	0.255814	0.104167	0.0952381	0.0416667	0.263158	0.09375	0.125	0.172414	0.136364	0.2	0.176471	0.121212	0.05	0.264706	0.1125	0.0465116	0.0652174	0.227273	0.176471	0.128205	0.142857	0.176471	0.208333	0.470588	0.36	0.357143	0.355556	0.333333	0.205882	0.214286	0.176471
49774811	Open Sea	0.428571	0.473684	0.517241	0.432432	0.464286	0.45283	0.622222	0.305556	0.464286	0.297297	0.375	0.189189	0.175	0.290323	0.533333	0.318182	0.333333	0.358974	0.307692	0.439024	0.205128	0.358974	0.333333	0.368421	0.25	0.419355	0.371429	0.422535	0.216216	0.465116	0.380952	0.241758	0.326531	0.447368	0.230769	0.384615	0.212121	0.48	0.538462	0.703704	0.45	0.333333	0.607143	0.708333	0.774194	0.611111	0.809524	0.5
50112193	Open Sea	0.66	0.614035	0.77551	0.758621	0.588235	0.56	0.395833	0.795918	0.697674	0.418919	0.435897	0.277778	0.227273	0.357143	0.583333	0.368421	0.515152	0.456522	0.302326	0.704545	0.434783	0.516129	0.477273	0.642857	0.472222	0.166667	0.488889	0.481928	0.244444	0.234043	0.387097	0.446429	0.5	0.4375	0.6	0.438356	0.205128	0.352941	0.6	0.571429	0.846154	0.7	0.5	0.825	0.727273	0.62069	0.571429	0.578947
50112195	Open Sea	0.354167	0.535714	0.680851	0.555556	0.411765	0.333333	0.212766	0.478261	0.302326	0.164384	0.222222	0.314286	0.175	0.327586	0.310345	0.228571	0.40625	0.222222	0.261905	0.363636	0.227273	0.310345	0.146341	0.222222	0.142857	0.416667	0.395349	0.378049	0.0888889	0.133333	0.322581	0.188679	0.365854	0.276596	0.55	0.211268	0.210526	0.176471	0.55	0.390244	0.615385	0.45	0.37931	0.725	0.571429	0.54386	0.25	0.631579
50118941	Open Sea	0.457143	0.678571	0.666667	0.307692	0.37931	0.47619	0.285714	0.692308	0.352941	0.241379	0.48	0.307692	0.212121	0.333333	0.128205	0.244444	0.37037	0.133333	0.4375	0.411765	0.0714286	0.444444	0.268293	0.2	0.0689655	0.318182	0.1875	0.211268	0.12	0.147059	0.294118	0.0945946	0.170732	0.181818	0.1	0.2	0.0612245	0.0769231	0.444444	0.659574	0.517241	0.384615	0.22	0.44	0.5	0.263158	0.411765	0.157895
50757501	Open Sea	0.428571	0.342105	0.396226	0.355556	0.227273	0.310345	0.261538	0.551724	0.34375	0.397727	0.418182	0.409091	0.25	0.453333	0.561404	0.245614	0.352941	0.306122	0.357143	0.297297	0.216216	0.386364	0.351852	0.2	0.2	0.34375	0.325	0.41573	0.302326	0.205128	0.25641	0.166667	0.422535	0.4	0.380952	0.16129	0.130435	0.142857	0.666667	0.730769	0.736842	0.833333	0.694444	0.716667	0.862069	0.578947	0.595238	0.785714
50757505	Open Sea	0.465753	0.309524	0.333333	0.391304	0.387755	0.298507	0.315068	0.597015	0.285714	0.575758	0.424242	0.408163	0.447368	0.5	0.6	0.457627	0.317073	0.310345	0.428571	0.309524	0.232558	0.46	0.409836	0.371429	0.216667	0.424242	0.348837	0.327103	0.25	0.212766	0.155556	0.280702	0.308642	0.358209	0.416667	0.220779	0.229167	0.206897	0.59375	0.844828	0.954545	0.78125	0.630435	0.791667	0.771429	0.671875	0.490196	0.789474
51004905	Open Sea	0.283333	0.456522	0.291667	0.380952	0.742857	0.8	0.55	0.4	0.380952	0.16	0.272727	0.588235	0.121951	0.372549	0.391304	0.222222	0.150943	0.214286	0.405405	0.326087	0.357143	0.424242	0.27027	0.2	0.166667	0.444444	0.357143	0.323077	0.293103	0.5	0.583333	0.276923	0.195652	0.30303	0.26087	0.326531	0.47619	0.347826	0.882353	0.473684	0.714286	0.666667	0.722222	0.851852	0.611111	0.576923	0.571429	0.933333
51004907	Open Sea	0.539683	0.617021	0.407407	0.576923	0.74359	0.918919	0.64	0.681818	0.384615	0.389831	0.35	0.444444	0.522727	0.622951	0.607843	0.435897	0.283019	0.431818	0.714286	0.384615	0.4	0.675676	0.638889	0.304348	0.368421	0.65	0.55814	0.648649	0.5	0.588235	0.56	0.416667	0.518519	0.705882	0.366667	0.576923	0.568182	0.434783	0.894737	0.725	0.913043	0.73913	0.794118	0.822581	0.705882	0.788235	0.809524	0.928571
51004909	Island	0.545455	0.625	0.586207	0.461538	0.756098	0.725	0.55	0.608696	0.5	0.193548	0.181818	0.35	0.333333	0.5	0.482759	0.380952	0.309091	0.196078	0.454545	0.254545	0.411765	0.595238	0.382353	0.36	0.375	0.666667	0.531915	0.474359	0.316667	0.444444	0.6	0.202532	0.433333	0.666667	0.354839	0.481481	0.444444	0.521739	0.826087	0.525	0.875	0.8	0.735294	0.873016	0.722222	0.563218	0.666667	0.9375
51004911	Island	0.467742	0.666667	0.5	0.652174	0.710526	0.825	0.586207	0.510638	0.52	0.274194	0.288889	0.6	0.348837	0.491803	0.525424	0.378378	0.413793	0.306122	0.589744	0.480769	0.424242	0.6	0.4	0.285714	0.5	0.714286	0.521739	0.615385	0.457627	0.578947	0.607143	0.337662	0.482143	0.738095	0.375	0.470588	0.52381	0.681818	0.791667	0.641026	0.863636	0.791667	0.965517	0.887097	0.85	0.91358	0.846154	0.875
51004913	Island	0.380952	0.479167	0.385965	0.545455	0.764706	0.717949	0.5	0.372093	0.384615	0.0983607	0.155556	0.421053	0.275	0.413793	0.293103	0.212121	0.166667	0.18	0.405405	0.38	0.375	0.435897	0.382353	0.259259	0.384615	0.380952	0.309524	0.407895	0.423729	0.527778	0.62963	0.276316	0.232143	0.714286	0.3	0.442308	0.414634	0.238095	0.875	0.594595	0.894737	0.541667	0.821429	0.842105	0.736842	0.565789	0.615385	0.8
51004915	Island	0.322034	0.489362	0.448276	0.454545	0.633333	0.675	0.410714	0.511628	0.375	0.166667	0.255814	0.47619	0.3	0.482759	0.37931	0.323529	0.215686	0.254902	0.540541	0.375	0.322581	0.333333	0.272727	0.259259	0.407407	0.6	0.487179	0.534247	0.303571	0.514286	0.541667	0.232877	0.150943	0.7	0.3	0.42	0.432432	0.428571	0.826087	0.567568	0.857143	0.72	0.857143	0.818182	0.722222	0.75	0.692308	0.833333
51004917	Island	0.321429	0.577778	0.526316	0.6	0.857143	0.95	0.528302	0.636364	0.478261	0.233333	0.325581	0.631579	0.410256	0.6	0.509091	0.333333	0.28	0.340909	0.702703	0.520833	0.34375	0.609756	0.466667	0.416667	0.518519	0.55	0.675676	0.632353	0.45283	0.588235	0.652174	0.342857	0.490196	0.85	0.392857	0.717391	0.611111	0.473684	0.956522	0.794118	1	0.875	0.933333	0.90566	0.666667	0.771429	0.8	0.833333
51004919	Island	0.290909	0.459459	0.528302	0.5625	0.68	0.756757	0.319149	0.5	0.409091	0.254902	0.243902	0.578947	0.358974	0.509091	0.509804	0.433333	0.244444	0.292683	0.5	0.266667	0.206897	0.425	0.230769	0.142857	0.538462	0.571429	0.441176	0.408451	0.372549	0.46875	0.45	0.234375	0.288889	0.658537	0.241379	0.35	0.5	0.35	0.869565	0.529412	0.857143	0.5	0.62963	0.851852	0.588235	0.615385	0.652174	0.692308
51004921	Island	0.333333	0.375	0.519231	0.461538	0.461538	0.645161	0.489362	0.55	0.473684	0.177778	0.166667	0.555556	0.388889	0.384615	0.522727	0.444444	0.230769	0.261905	0.451613	0.282609	0.25	0.368421	0.4	0.238095	0.52	0.6	0.392857	0.453125	0.372093	0.633333	0.52381	0.306452	0.325581	0.756757	0.551724	0.432432	0.517241	0.4	0.96	0.685714	0.761905	0.541667	0.76	0.9	0.666667	0.619048	0.9	0.909091
51004923	Island	0.388889	0.645161	0.634615	0.615385	0.652174	0.78125	0.583333	0.631579	0.578947	0.422222	0.235294	0.7	0.542857	0.490566	0.5	0.481481	0.3	0.404762	0.483871	0.5	0.535714	0.605263	0.36	0.421053	0.461538	0.85	0.517241	0.546875	0.512821	0.551724	0.619048	0.421053	0.3	0.72973	0.518519	0.583333	0.580645	0.555556	0.92	0.823529	0.857143	0.772727	0.956522	0.9	0.8	0.774194	0.8	0.909091
51004925	Island	0.295455	0.344828	0.521739	0.666667	0.444444	0.892857	0.369565	0.617647	0.470588	0.125	0.0333333	0.411765	0.366667	0.355556	0.380952	0.291667	0.189189	0.297297	0.428571	0.488372	0.24	0.486486	0.304348	0.222222	0.4	0.684211	0.357143	0.436364	0.3	0.730769	0.4	0.244898	0.176471	0.69697	0.5	0.382353	0.37037	0.352941	0.833333	0.470588	0.85	0.55	0.904762	0.586957	0.615385	0.637931	0.7	1
51004927	Island	0.727273	0.758621	0.627907	0.8	0.705882	1	0.674419	0.757576	0.625	0.525	0.433333	0.764706	0.62069	0.756098	0.690476	0.541667	0.342105	0.540541	0.678571	0.731707	0.541667	0.657143	0.478261	0.611111	0.538462	0.789474	0.642857	0.807018	0.55	0.73913	0.777778	0.48	0.575758	0.794118	0.64	0.705882	0.625	0.882353	0.9375	0.758621	0.944444	0.95	1	0.931818	0.916667	0.827586	0.944444	0.8
51004929	Island	0.395349	0.607143	0.682927	0.3	0.5	0.416667	0.452381	0.580645	0.5625	0.25641	0.103448	0.294118	0.44	0.365854	0.425	0.375	0.142857	0.236842	0.269231	0.595238	0.461538	0.485714	0.26087	0.235294	0.461538	0.736842	0.461538	0.385965	0.2	0.391304	0.625	0.217391	0.151515	0.59375	0.52	0.363636	0.26087	0.235294	0.933333	0.551724	0.722222	0.7	0.809524	0.727273	0.833333	0.596154	0.611111	0.7
51004931	Island	0.488372	0.464286	0.525	0.6	0.5625	0.956522	0.425	0.482759	0.3125	0.166667	0.107143	0.5	0.461538	0.560976	0.461538	0.375	0.258065	0.378378	0.375	0.5	0.307692	0.484848	0.409091	0.25	0.461538	0.736842	0.541667	0.614035	0.457143	0.636364	0.6875	0.266667	0.1875	0.78125	0.666667	0.424242	0.434783	0.411765	1	0.730769	1	0.736842	0.95	0.785714	0.923077	0.64	0.882353	0.8
51030257	Island	0.0740741	0.416667	0.25	0.1875	0.5	0.555556	0.214286	0.578947	0.352941	0.106667	0.171429	0.102564	0.114286	0.211538	0.358974	0.0571429	0.282051	0.030303	0.230769	0.170732	0.05	0.153846	0.111111	0.173913	0.2	0.222222	0.272727	0.153846	0.0740741	0.173913	0.0434783	0.246914	0.333333	0.170732	0.142857	0.351351	0.103448	0.1	0.4	0.1	0.454545	0.0714286	0.296296	0.375	0.37931	0.511111	0.4	0.391304
51030259	Island	0.129032	0.441176	0.222222	0.1875	0.26087	0.433333	0.181818	0.473684	0.444444	0.108108	0.216216	0.15	0.147059	0.222222	0.25641	0.0277778	0.225	0.0294118	0.192308	0.190476	0	0.146341	0.027027	0.0454545	0.222222	0.047619	0.212121	0.196429	0.107143	0.12	0.0833333	0.225	0.268293	0.190476	0.142857	0.35	0.0645161	0.0909091	0.368421	0.1	0.545455	0	0.296296	0.313725	0.4	0.456522	0.416667	0.304348
51030261	Island	0.275	0.454545	0.390244	0.128205	0.344828	0.6	0.229167	0.619048	0.47619	0.0888889	0.263158	0.0888889	0.0769231	0.137931	0.3125	0.105263	0.275	0.135135	0.242424	0.333333	0.125	0.232558	0.0952381	0.230769	0.171429	0.26087	0.205128	0.211268	0.0689655	0.185185	0.285714	0.275862	0.365385	0.183673	0.0625	0.290909	0.0540541	0.117647	0.45	0.272727	0.538462	0.222222	0.517241	0.462963	0.411765	0.509804	0.384615	0.384615
51030263	Island	0.146341	0.511111	0.289474	0.121951	0.25	0.513514	0.285714	0.590909	0.363636	0.0833333	0.189189	0.130435	0.047619	0.101695	0.346939	0.0263158	0.285714	0.0833333	0.181818	0.142857	0.0769231	0.243902	0.047619	0.115385	0.264706	0.130435	0.2	0.118421	0.0689655	0.142857	0.166667	0.244444	0.314815	0.16	0.0555556	0.0925926	0.05	0.0526316	0.473684	0.289474	0.384615	0.105263	0.5	0.326923	0.324324	0.462963	0.333333	0.375
51030265	Island	0.0232558	0.333333	0.282051	0.0487805	0.142857	0.459459	0.12	0.318182	0.217391	0.0515464	0.025	0.0666667	0.0714286	0.0677966	0.24	0.0526316	0.166667	0.0277778	0	0.0714286	0.08	0.166667	0.047619	0.0769231	0.171429	0.130435	0.075	0.0394737	0.0666667	0.107143	0.0555556	0.146067	0.185185	0.0980392	0	0.0714286	0	0	0.368421	0.184211	0.461538	0.105263	0.09375	0.115385	0.315789	0.407407	0.166667	0.25
51030267	Island	0.340426	0.521739	0.534884	0.365854	0.272727	0.657895	0.5	0.666667	0.277778	0.31	0.230769	0.304348	0.217391	0.265625	0.297872	0.214286	0.395349	0.121951	0.277778	0.394737	0.21875	0.512195	0.372093	0.269231	0.416667	0.217391	0.355556	0.3125	0.206897	0.21875	0.394737	0.44898	0.568966	0.381818	0.263158	0.389831	0.1875	0.272727	0.391304	0.357143	0.611111	0.428571	0.55	0.660377	0.595238	0.6	0.5	0.5
51030269	Island	0.109091	0.403846	0.265306	0.186047	0.212121	0.55	0.188679	0.423077	0.388889	0.021978	0.257143	0.06	0.108696	0.0307692	0.122449	0	0.0851064	0.0238095	0.0789474	0.184211	0.0625	0.153846	0.0888889	0.1	0.131579	0.0740741	0.0612245	0.107143	0.0344828	0.114286	0.135135	0.174757	0.16129	0.0740741	0.047619	0.0689655	0.0416667	0.0434783	0.4	0.272727	0.285714	0.0869565	0.386364	0.272727	0.243902	0.254545	0.3125	0.16
51030271	Island	0.189655	0.407407	0.288462	0.195652	0.263158	0.55	0.314815	0.555556	0.631579	0.148936	0.205882	0.0961538	0.190476	0.116667	0.294118	0.0652174	0.204545	0.113636	0.121951	0.230769	0.0625	0.323529	0.108696	0.137931	0.166667	0.153846	0.215686	0.101124	0.0625	0.0666667	0.135135	0.217822	0.163934	0.175439	0.0434783	0.175439	0.155556	0.12	0.347826	0.255814	0.571429	0.2	0.369565	0.36	0.372093	0.45614	0.333333	0.461538
51030273	Island	0.0508475	0.160714	0.272727	0.12766	0.0909091	0.488889	0.122807	0.24	0.470588	0.045977	0.105263	0.0566038	0.0769231	0.0461538	0.142857	0	0.136364	0.0434783	0.0681818	0	0	0.2	0.0930233	0.133333	0.2	0.0740741	0.0196078	0.0465116	0	0.0666667	0.0810811	0.0990099	0.0535714	0.0666667	0.0833333	0.0545455	0	0	0.315789	0.205128	0.391304	0.217391	0.282609	0.226415	0.2	0.115385	0.294118	0.190476
51030275	Island	0.103448	0.444444	0.358491	0.243902	0.176471	0.575	0.230769	0.36	0.533333	0.101266	0.228571	0.169811	0.170732	0.140625	0.386364	0.0555556	0.333333	0.025641	0.268293	0.282051	0.0882353	0.28	0.105263	0.310345	0.25	0.233333	0.166667	0.192771	0.153846	0.16129	0.166667	0.214286	0.166667	0.226415	0.26087	0.211538	0.205128	0.0714286	0.5	0.205128	0.625	0.2	0.372093	0.320755	0.358974	0.395833	0.333333	0.578947
51030277	Island	0.160714	0.5	0.415094	0.225	0.212121	0.526316	0.203704	0.321429	0.5	0.103896	0.1875	0.215686	0.170732	0.147541	0.238095	0	0.342105	0	0.3	0.0810811	0.181818	0.26087	0.111111	0.206897	0.171429	0.233333	0.222222	0.134146	0.115385	0.16129	0.2	0.193548	0.277778	0.204082	0.0952381	0.0980392	0.153846	0.0357143	0.466667	0.25	0.590909	0.35	0.475	0.48	0.358974	0.446809	0.333333	0.3
51030279	Island	0.214286	0.55102	0.384615	0.27907	0.242424	0.578947	0.307692	0.357143	0.538462	0.0972222	0.233333	0.204082	0.175	0.245902	0.309524	0.0555556	0.333333	0.0512821	0.275	0.257143	0.0588235	0.416667	0.121212	0.357143	0.2	0.233333	0.266667	0.219512	0.16	0.2	0.2	0.268817	0.339286	0.2	0.0952381	0.102041	0.105263	0.259259	0.428571	0.277778	0.571429	0.263158	0.475	0.387755	0.282051	0.425532	0.2	0.631579
51030281	Island	0.181818	0.442308	0.34	0.162791	0.290323	0.540541	0.358491	0.37037	0.333333	0.114286	0.193548	0.125	0.105263	0.169492	0.418605	0.0277778	0.432432	0.2	0.125	0.272727	0.0606061	0.304348	0.242424	0.230769	0.171429	0.16129	0.272727	0.185185	0.0833333	0.172414	0.142857	0.225806	0.240741	0.23913	0.285714	0.1875	0.135135	0.111111	0.428571	0.411765	0.428571	0.235294	0.461538	0.367347	0.351351	0.297872	0.384615	0.684211
51030283	Island	0.183673	0.416667	0.320755	0.309524	0.222222	0.638889	0.296296	0.444444	0.416667	0.132353	0.216216	0.25	0.147059	0.170213	0.357143	0.0689655	0.388889	0.222222	0.439024	0.235294	0.121212	0.388889	0.3125	0.291667	0.294118	0.185185	0.292683	0.22973	0.227273	0.148148	0.290323	0.244444	0.222222	0.255814	0.294118	0.12766	0.105263	0.125	0.5	0.387097	0.5	0.444444	0.3125	0.375	0.34375	0.422222	0.5	0.636364
51030285	Island	0.148936	0.533333	0.38	0.25641	0.296296	0.59375	0.365385	0.384615	0.416667	0.152542	0.315789	0.204082	0.147059	0.340909	0.447368	0.037037	0.441176	0.264706	0.472222	0.233333	0.129032	0.533333	0.16129	0.272727	0.16129	0.2	0.257143	0.205882	0.0952381	0.4	0.178571	0.258427	0.264151	0.243902	0.25	0.214286	0.157895	0.227273	0.666667	0.538462	0.5	0.1875	0.46875	0.384615	0.392857	0.347826	0.5	0.7
51374895	Open Sea	0.5	0.5	0.588235	0.520833	0.457143	0.614035	0.409091	0.375	0.457143	0.51087	0.4375	0.15	0.530612	0.222222	0.316667	0.296296	0.395349	0.305556	0.583333	0.347826	0.282609	0.4	0.309091	0.222222	0.133333	0.3	0.492537	0.356522	0.422222	0.272727	0.431373	0.372093	0.340426	0.344444	0.236842	0.301205	0.226415	0.333333	0.758621	0.648148	0.666667	0.636364	0.517241	0.649351	0.516129	0.686747	0.566667	0.5
51568961	Island	0.757576	0.921053	0.676471	0.52	0.578947	0.590909	0.5	0.814815	0.928571	0.650794	0.547619	0.75	0.446809	0.559322	0.380952	0.28	0.704545	0.559322	0.617021	0.727273	0.689655	0.606557	0.622222	0.548387	0.44186	0.344828	0.604167	0.567164	0.638298	0.564103	0.6	0.326733	0.25	0.388889	0.52	0.382979	0.65	0.52381	0.722222	0.903226	0.7	0.65	0.8	0.877193	0.9375	0.671875	0.833333	0.611111
51568963	Island	0.825	0.6875	0.65	0.633333	0.625	0.588235	0.530612	0.814815	0.736842	0.561644	0.425532	0.615385	0.410714	0.590909	0.302632	0.42623	0.685185	0.550725	0.490566	0.745098	0.705882	0.483871	0.44	0.378378	0.326923	0.323529	0.642857	0.535714	0.611111	0.5	0.529412	0.300813	0.25	0.349206	0.517241	0.368421	0.627451	0.384615	0.793103	0.85	0.888889	0.857143	0.833333	0.848485	0.666667	0.710843	0.944444	0.631579
51568965	Island	0.883721	0.82	0.8	0.625	0.653846	0.75	0.618182	0.821429	0.842105	0.64	0.490566	0.75	0.482759	0.591549	0.3875	0.4375	0.690909	0.552239	0.482759	0.745455	0.647059	0.507463	0.482143	0.333333	0.363636	0.34375	0.714286	0.588235	0.627119	0.428571	0.574074	0.283465	0.278689	0.40625	0.46875	0.330579	0.685185	0.444444	0.766667	0.829787	0.947368	0.695652	0.829268	0.865672	0.703704	0.761905	0.833333	0.772727
51568967	Island	0.883721	0.636364	0.688889	0.514286	0.588235	0.605263	0.62069	0.628571	0.75	0.575	0.425926	0.580645	0.344262	0.581081	0.294118	0.308824	0.683333	0.441176	0.4	0.627119	0.638889	0.48	0.430769	0.380952	0.315789	0.25	0.441176	0.447917	0.57377	0.425926	0.545455	0.265625	0.241935	0.342857	0.472222	0.277778	0.576271	0.366667	0.59375	0.92	0.904762	0.708333	0.780488	0.774648	0.62069	0.597701	0.619048	0.833333
51568969	Island	0.789474	0.762712	0.75	0.659574	0.657895	0.695652	0.651515	0.761905	0.821429	0.639535	0.534483	0.647059	0.454545	0.571429	0.375	0.390244	0.661765	0.480519	0.529412	0.671642	0.641026	0.52439	0.507042	0.396226	0.370968	0.394737	0.575	0.550459	0.666667	0.416667	0.566667	0.307143	0.352941	0.3625	0.575	0.316547	0.7	0.485714	0.609756	0.907407	0.875	0.592593	0.87234	0.839506	0.71875	0.701923	0.7	0.73913
51568971	Island	0.870968	0.822581	0.734694	0.711538	0.619048	0.638298	0.681159	0.738095	0.814815	0.644444	0.603175	0.627907	0.378788	0.546512	0.45098	0.3875	0.671429	0.519481	0.528571	0.724638	0.631579	0.619048	0.565217	0.454545	0.323077	0.378378	0.636364	0.563636	0.634921	0.454545	0.65625	0.353741	0.375	0.345679	0.595238	0.34507	0.652174	0.5	0.666667	0.896552	0.88	0.777778	0.875	0.8625	0.764706	0.740741	0.818182	0.695652
51568973	Island	0.892308	0.848485	0.82	0.622642	0.627907	0.816327	0.671429	0.837209	0.862069	0.765957	0.542857	0.75	0.462687	0.577778	0.415094	0.409091	0.666667	0.506173	0.540541	0.704225	0.567568	0.642857	0.695652	0.385965	0.367647	0.414634	0.613333	0.596491	0.692308	0.5	0.655738	0.38	0.358209	0.376471	0.510638	0.37415	0.75	0.484848	0.680851	0.896552	0.888889	0.689655	0.914894	0.914634	0.805556	0.785714	0.818182	0.695652
51568975	Island	0.787879	0.791667	0.816327	0.703704	0.538462	0.679245	0.647887	0.680851	0.833333	0.712871	0.541667	0.659091	0.459016	0.534884	0.37963	0.359551	0.61194	0.5	0.506494	0.632353	0.666667	0.686047	0.6	0.37931	0.324324	0.4	0.636364	0.547826	0.612903	0.465753	0.57377	0.328947	0.408451	0.287234	0.458333	0.307143	0.657143	0.433333	0.490196	0.857143	0.846154	0.548387	0.8	0.872093	0.647059	0.697479	0.84	0.56
51568977	Island	0.855072	0.763158	0.75	0.649123	0.560976	0.719298	0.597403	0.673469	0.9	0.617391	0.486486	0.659091	0.409091	0.544444	0.40708	0.418367	0.628571	0.478723	0.561644	0.61194	0.609756	0.654762	0.586667	0.442623	0.266667	0.413043	0.554217	0.583333	0.621212	0.410959	0.546875	0.288462	0.333333	0.287234	0.531915	0.304965	0.691176	0.433333	0.615385	0.862069	0.92	0.666667	0.823529	0.872093	0.742857	0.661157	0.821429	0.761905
51568979	Island	0.868421	0.866667	0.75	0.762712	0.708333	0.677419	0.74359	0.75	0.935484	0.681416	0.532468	0.6875	0.476923	0.674699	0.436364	0.45	0.617647	0.563218	0.565789	0.61039	0.609756	0.6	0.564103	0.47619	0.337662	0.525	0.675	0.593496	0.597015	0.464789	0.609375	0.361842	0.473684	0.347826	0.553571	0.348148	0.640625	0.551724	0.62069	0.881356	0.846154	0.724138	0.862745	0.915663	0.722222	0.722222	0.851852	0.909091
51568981	Island	0.763158	0.821918	0.854545	0.684211	0.68	0.694915	0.654321	0.708333	0.83871	0.641509	0.592105	0.591837	0.45	0.632184	0.444444	0.464646	0.6	0.542169	0.605634	0.597222	0.692308	0.727273	0.602564	0.47541	0.402597	0.454545	0.632184	0.571429	0.52459	0.438356	0.52459	0.347222	0.417722	0.3	0.561404	0.325397	0.61194	0.533333	0.685185	0.813559	0.913043	0.75	0.795918	0.810127	0.634146	0.59375	0.608696	0.904762
51568983	Island	0.776316	0.819444	0.781818	0.704918	0.591837	0.637931	0.641026	0.617021	0.774194	0.528846	0.506667	0.695652	0.448276	0.482353	0.373832	0.336634	0.548387	0.43038	0.538462	0.557143	0.473684	0.595238	0.5	0.389831	0.27027	0.290323	0.574713	0.530435	0.57377	0.394737	0.442623	0.251799	0.378049	0.255556	0.5	0.285714	0.641791	0.357143	0.611111	0.839286	0.833333	0.714286	0.693878	0.763158	0.571429	0.634921	0.652174	0.75
51568985	Island	0.714286	0.871429	0.87931	0.704918	0.541667	0.618182	0.649351	0.76087	0.774194	0.576923	0.532468	0.6875	0.525424	0.576471	0.372727	0.444444	0.444444	0.480519	0.552239	0.6	0.439024	0.588235	0.582278	0.409836	0.375	0.387097	0.586207	0.508772	0.403226	0.341772	0.45614	0.265734	0.433735	0.23913	0.490909	0.248	0.558824	0.321429	0.648148	0.783333	0.608696	0.689655	0.666667	0.851351	0.52381	0.603306	0.565217	0.8
51568987	Island	0.746667	0.769231	0.714286	0.693548	0.64	0.618182	0.708861	0.6875	0.8125	0.561905	0.527027	0.68	0.459016	0.448718	0.366972	0.405941	0.5	0.538462	0.515625	0.5	0.555556	0.576471	0.506667	0.5	0.293333	0.454545	0.619048	0.535088	0.571429	0.381579	0.551724	0.3125	0.430233	0.228916	0.5	0.294574	0.606061	0.566667	0.596491	0.95	0.727273	0.766667	0.918367	0.782609	0.674419	0.61157	0.8	0.833333
51568989	Island	0.888889	0.959459	1	0.775862	0.77551	0.833333	0.746835	0.76087	0.870968	0.78	0.653333	0.78	0.561404	0.615385	0.531532	0.625	0.666667	0.594937	0.654545	0.735294	0.725	0.697368	0.689189	0.571429	0.439394	0.545455	0.704545	0.648148	0.606557	0.438356	0.618182	0.47482	0.555556	0.395349	0.636364	0.4	0.666667	0.612903	0.767857	0.95082	0.95	0.814815	0.958333	0.909091	0.795455	0.788618	0.958333	0.857143
51568991	Island	0.720588	0.75	0.875	0.555556	0.608696	0.637931	0.6	0.688889	0.8	0.546392	0.486842	0.680851	0.490196	0.367089	0.285714	0.404494	0.442623	0.474359	0.481481	0.575758	0.621622	0.58209	0.507692	0.464286	0.213115	0.53125	0.618421	0.554455	0.606557	0.346667	0.557692	0.273438	0.402778	0.209877	0.489796	0.274336	0.508772	0.482759	0.6	0.84127	0.882353	0.692308	0.790698	0.844828	0.534884	0.622951	0.666667	0.888889
51568993	Island	0.666667	0.85	0.734694	0.513514	0.452381	0.489796	0.453125	0.625	0.75	0.518072	0.451613	0.692308	0.414634	0.411765	0.191011	0.323944	0.4	0.347222	0.377778	0.491525	0.388889	0.431034	0.340426	0.27907	0.211538	0.5	0.478261	0.4875	0.454545	0.306452	0.375	0.245455	0.267606	0.2	0.368421	0.215054	0.347826	0.321429	0.444444	0.729167	0.625	0.666667	0.6	0.75	0.470588	0.38	0.4	0.642857
51568995	Island	0.490909	0.709677	0.744681	0.3125	0.432432	0.382979	0.438596	0.588235	0.47619	0.394737	0.37931	0.513514	0.380952	0.421875	0.17284	0.210526	0.333333	0.28125	0.357143	0.384615	0.59375	0.306122	0.166667	0.309524	0.133333	0.409091	0.5	0.458333	0.301887	0.237288	0.25641	0.196078	0.231884	0.111111	0.297297	0.166667	0.25641	0.208333	0.35	0.767442	0.75	0.6	0.518519	0.565217	0.454545	0.355556	0.315789	0.571429
51568997	Island	0.648649	0.804878	0.666667	0.5	0.517241	0.294118	0.564103	0.636364	0.533333	0.36	0.414634	0.538462	0.322581	0.44	0.157895	0.325	0.357143	0.38	0.3125	0.363636	0.538462	0.466667	0.285714	0.333333	0.222222	0.625	0.530612	0.418182	0.348837	0.261905	0.384615	0.185185	0.34	0.188679	0.481481	0.151515	0.375	0.409091	0.24	0.590909	0.642857	0.5	0.727273	0.653846	0.5	0.451613	0.5	0.636364
51841487	Open Sea	0.428571	0.732394	0.474576	0.333333	0.491525	0.602941	0.211538	0.692308	0.444444	0.371429	0.4	0.428571	0.311688	0.366667	0.0487805	0.272727	0.147541	0.181818	0.313725	0.118644	0.340909	0.339286	0.111111	0.186047	0.166667	0.264706	0.3	0.251969	0.14	0.0597015	0.0727273	0.0840336	0.126984	0.0561798	0.0487805	0.117021	0.103448	0.136364	0.181818	0.125	0.642857	0.266667	0.402985	0.5	0.310345	0.373494	0.333333	0.217391
52347681	Open Sea	0.736842	0.785714	0.488372	0.571429	0.684211	0.5	0.521739	0.571429	0.619048	0.44	0.463415	0.282609	0.280702	0.491525	0.451613	0.27027	0.254545	0.269231	0.387755	0.804348	0.2	0.538462	0.409091	0.290323	0.166667	0.285714	0.459459	0.65	0.341463	0.324324	0.419355	0.415842	0.377358	0.630137	0.25	0.439394	0.736842	0.347826	0.896552	0.787879	0.806452	0.8	0.531915	0.775	0.857143	0.931507	0.772727	0.678571
52369925	Open Sea	0.770492	0.65	0.808511	0.827586	0.756098	0.886076	0.528571	0.764706	0.695652	0.630769	0.732143	0.630435	0.569444	0.561224	0.72043	0.649351	0.578125	0.692308	0.333333	0.490196	0.722222	0.425926	0.136364	0.16	0.519231	0.52381	0.568966	0.527473	0.673077	0.548387	0.325	0.516667	0.527778	0.590164	0.633333	0.44898	0.537037	0.65	0.421053	0.822222	0.785714	0.71875	0.835821	0.765625	0.710526	0.783505	0.75	0.777778
52416577	Open Sea	0.309524	0.436782	0.535714	0.27027	0.428571	0.638889	0.311828	0.479167	0.488372	0.391304	0.462963	0.456522	0.318182	0.53125	0.291667	0.25641	0.27027	0.346939	0.444444	0.125	0.189189	0.363636	0.333333	0.2	0.3	0.64	0.343284	0.27193	0.418605	0.278689	0.396226	0.401961	0.3125	0.40625	0.407407	0.243902	0.155556	0.4375	0.511628	0.538462	0.75	0.666667	0.711111	0.761905	0.758621	0.6875	0.866667	0.428571
52416583	Open Sea	0.21875	0.298701	0.340426	0.15625	0.394737	0.421053	0.267442	0.529412	0.466667	0.35	0.309524	0.378378	0.2	0.45614	0.179104	0.108108	0.228571	0.25	0.275862	0.12	0.111111	0.111111	0.18	0.136364	0.210526	0.315789	0.214286	0.206522	0.317073	0.148148	0.354167	0.252747	0.108108	0.266667	0.380952	0.242424	0.125	0.24	0.447368	0.394737	0.636364	0.68	0.46875	0.46	0.548387	0.636364	0.583333	0.454545
52525867	Open Sea	0.410959	0.578431	0.641791	0.326923	0.447368	0.147541	0.257576	0.309091	0.617021	0.302632	0.25	0.317757	0.516667	0.390244	0.24	0.42623	0.327273	0.189655	0.328125	0.2	0.229167	0.411765	0.183099	0.362069	0.288462	0.459459	0.135135	0.184783	0.287671	0.482759	0.285714	0.212389	0.3625	0.25641	0.12	0.264368	0.193878	0.111111	0.72	0.525	0.673469	0.571429	0.433333	0.606061	0.567568	0.401709	0.62069	0.459459
53054581	Open Sea	0.858974	0.726316	0.703704	0.615385	0.791045	0.74	0.795181	0.836364	0.769231	0.662791	0.415385	0.633803	0.492958	0.495327	0.549451	0.565217	0.464789	0.571429	0.365854	0.569231	0.55814	0.767123	0.442623	0.324324	0.368421	0.428571	0.424658	0.465278	0.733333	0.338983	0.33871	0.379562	0.403226	0.346154	0.371429	0.225806	0.371795	0.40625	0.512195	0.444444	0.71875	0.44898	0.564516	0.659574	0.612245	0.604167	0.741935	0.833333
53221851	Open Sea	0.764706	0.552632	0.64	0.222222	0.35	0.909091	0.619048	0.870968	0.535714	0.166667	0.333333	0.62069	0.230769	0.48	0.328125	0.3125	0.62963	0.307692	0.333333	0.395349	0.25	0.302326	0.333333	0.166667	0.477273	0.357143	0.333333	0.2875	0.272727	0.235294	0.4	0.224138	0.1	0.392857	0.4	0.191176	0.307692	0.285714	0.666667	0.6	0.535714	0.464286	0.4	0.416667	0.580645	0.603448	0.423077	0.2
53358851	Open Sea	0.416667	0.322581	0.275862	0.341463	0.138889	0.270833	0.25	0.605263	0.52381	0.857143	0.763158	0.651163	0.454545	0.521127	0.923077	0.611111	0.5625	0.694444	0.71875	0.795455	0.944444	0.548387	0.551724	0.85	0.8	0.736842	0.622642	0.526316	0.525	0.521739	0.692308	0.797297	0.293103	0.619048	0.777778	0.45283	0.884615	0.727273	0.545455	0.136364	0.692308	0.285714	0.815789	0.266667	0.434783	0.64	0.4	0.444444
